# Supplementary material for: Caspase-3 Cleaves Extracellular Vesicle Proteins During Auditory Brainstem Development
Source: Front Cell Neurosci. 2020 Nov 12;14:573345. doi: 10.3389/fncel.2020.573345 (PMC7689216; doi:10.3389/fncel.2020.573345)
Supplement: Supplementary file 5 [file Table_5.XLSX]

## Sheet: NTA 1
NTA Experiment Summary File
Created with NTA 3.3 Dev Build 3.3.301
[Experiment Details]
Software Version	NTA 3.3 Dev Build 3.3.301
Experiment Name	Capture 2019-07-24 14-17-40.nano
Operator Name	Mel
Time Captured	14:17:40 24/07/2019
Sample Description	25 4-6 7/24/19
Pre-treatment
Diluent	PBS
Remarks
Filename:	Capture 2019-07-24 14-17-58	Capture 2019-07-24 14-18-33	Capture 2019-07-24 14-19-08	Capture 2019-07-24 14-19-43	Capture 2019-07-24 14-20-18
[Conditions]
Temperature/C	25.256	25.232	25.21	25.217	25.2
Viscosity/cP	0.883532	0.884014	0.884456	0.884315	0.884657
Camera Type	sCMOS	sCMOS	sCMOS	sCMOS	sCMOS
Laser Type	Blue488	Blue488	Blue488	Blue488	Blue488
Camera Level	13	13	13	13	13
Slider Shutter	1232	1232	1232	1232	1232
Slider Gain	219	219	219	219	219
Shutter/ms	30.8	30.8	30.8	30.8	30.8
Camera Histogram Upper Limit	8235	8235	8235	8235	8235
Camera Histogram Lower Limit	0	0	0	0	0
Frame rate/fps	24.9825	24.9825	24.9825	24.9825	24.9825
Syringe Pump Speed/AU	80	80	80	80	80
[Settings]
Detection Threshold	3	3	3	3	3
Max Jump Mode	Auto	Auto	Auto	Auto	Auto
Max Jump Distance	14.5023	15.0121	16.2458	15.5041	14.7647
Blur	Auto	Auto	Auto	Auto	Auto
Min Track Length	Auto	Auto	Auto	Auto	Auto
First frame	0	0	0	0	0
Total frames analysed	749	749	749	749	749
[Exclusion Regions]
No Exclusion Regions Used
[Results]						Average	Standard Error
Dilution factor (concentrations adjusted for this factor)	Not recorded	Not recorded	Not recorded	Not recorded	Not recorded
Concentration (Particles / ml)	960000000	1230000000	1130000000	1160000000	1420000000	1180000000	74300000
Particles per frame	48.7	62.2	57.3	58.8	72	59.8	3.8
Centres per frame	50.3	61.6	59.7	63.7	72.8	61.6	3.6
Completed tracks	3481	4411	4407	4785	5453
X-Drift (pix/frame)	-9.6	-9.5	-9.5	-9.4	-9.4
Y-Drift (pix/frame)	0.6	0.4	0.3	0.3	0.3
[Information]
Completed Tracks	OK	OK	OK	OK	OK
Concentration	OK	OK	OK	OK	OK
Video length	OK	OK	OK	OK	OK
Noise level	No	No	No	No	No
Vibration detected	Minor vibration	No	No	Minor vibration	No
Vibration correction applied	Yes	No	No	Yes	No
Settings changed?	No	No	No	No	No
Errors (1)
Errors (2)
[Data Included]
Size distribution - Number weighting - With Percentiles
Size distribution - Surface area weighting - With Percentiles
Size distribution - Volume weighting - With Percentiles
Diffusion distribution - Number weighting - With Percentiles
Diffusion distribution - Surface area weighting - With Percentiles
Diffusion distribution - Volume weighting - With Percentiles
[Size Data]
Analysis Method	FTLA
Weighting	Number
Filename	Capture 2019-07-24 14-17-58	Capture 2019-07-24 14-18-33	Capture 2019-07-24 14-19-08	Capture 2019-07-24 14-19-43	Capture 2019-07-24 14-20-18	Average	Standard Error
Mean	118.9	121.7	121.8	121.2	122.6	121.2	0.6
Mode	102.6	84.2	99.7	95.3	95	95.4	3.1
SD	38.1	40.7	43.7	37.5	39	39.8	1.1
D10	83.1	80.8	78.6	85.5	83	82.2	1.2
D50	108.5	113	109.7	110.5	112.5	110.9	0.8
D90	169.5	164	191.7	165.5	179.6	174	5.2
Valid Tracks	1524	1889	1761	1869	2283
Graph Data
Bin centre (nm)	Concentration (particles / ml)	Concentration (particles / ml)	Concentration (particles / ml)	Concentration (particles / ml)	Concentration (particles / ml)	Concentration average	Standard Error
0.5	0	0	0	0	0	0	0
1.5	0	0	0	0	0	0	0
2.5	0	0	0	0	0	0	0
3.5	0	0	0	0	0	0	0
4.5	0	0	0	0	0	0	0
5.5	0	0	0	0	0	0	0
6.5	0	0	0	0	0	0	0
7.5	0	0	0	0	0	0	0
8.5	0	0	0	0	0	0	0
9.5	0	0	0	0	0	0	0
10.5	0	0	0	0	0	0	0
11.5	0	0	0	0	0	0	0
12.5	0	0	0	4	0	0	0
13.5	0	0	0	30	0	6	6
14.5	0	0	0	168	0	34	34
15.5	0	0	0	682	0	136	136
16.5	0	0	0	2130	0	426	426
17.5	0	0	0	5359	0	1072	1072
18.5	0	0	0	11241	0	2248	2248
19.5	0	0	0	20238	0	4048	4048
20.5	0	0	0	32036	0	6407	6407
21.5	0	0	3	45516	0	9104	9103
22.5	0	0	28	59085	0	11823	11816
23.5	4	0	177	71168	0	14270	14225
24.5	72	0	851	80625	0	16310	16080
25.5	731	0	3217	86935	0	18177	17200
26.5	4603	0	9727	90158	0	20898	17408
27.5	18921	0	24026	90750	0	26739	16727
28.5	53300	0	49548	89361	0	38442	17165
29.5	107781	0	87181	86663	0	56325	23308
30.5	163602	0	133634	83246	0	76096	33616
31.5	194581	0	181975	79573	0	91226	42248
32.5	188952	0	224108	75977	0	97808	46834
33.5	155803	0	253632	72680	0	96423	48682
34.5	113200	0	267533	69818	0	90110	49327
35.5	75014	0	266293	67466	0	81755	48822
36.5	46791	0	252881	65663	0	73067	46774
37.5	28261	0	231391	64425	0	64815	43293
38.5	16940	0	205901	63761	2	57321	38935
39.5	10290	2	179765	63677	4	50748	34351
40.5	6443	4	155347	64186	11	45198	30066
41.5	4215	10	134053	65312	26	40723	26421
42.5	2908	21	116534	67089	58	37322	23585
43.5	2130	39	102942	69567	124	34960	21599
44.5	1664	67	93166	72813	255	33593	20423
45.5	1388	107	87028	76913	502	33188	19981
46.5	1236	164	84425	81976	954	33751	20192
47.5	1173	242	85439	88133	1747	35347	21006
48.5	1185	348	90437	95546	3096	38122	22419
49.5	1270	496	100176	104406	5316	42333	24501
50.5	1439	704	115933	114941	8867	48377	27415
51.5	1718	1003	139676	127423	14395	56843	31465
52.5	2153	1442	174270	142173	22789	68565	37151
53.5	2818	2100	223710	159569	35243	84688	45223
54.5	3840	3105	293313	180058	53323	106728	56730
55.5	5421	4668	389805	204171	79043	136621	73009
56.5	7888	7137	521169	232536	114933	176733	95614
57.5	11774	11091	696133	265900	164101	229800	126185
58.5	17932	17485	923212	305150	230279	298812	166230
59.5	27716	27895	1209352	351347	317838	386829	216836
60.5	43230	44892	1558374	405753	431763	496803	278335
61.5	67678	72600	1969580	469874	577580	631462	349982
62.5	105773	117493	2436940	545500	761217	793385	429732
63.5	164197	189430	2949206	634759	988814	985281	514171
64.5	251981	302869	3491026	740162	1266464	1210500	598653
65.5	380659	478025	4044875	864662	1599919	1473628	677640
66.5	563985	741554	4593351	1011704	1994262	1780971	745258
67.5	817018	1126113	5121333	1185274	2453581	2140664	796129
68.5	1154468	1668083	5617571	1389932	2980663	2562144	826613
69.5	1588435	2402962	6075495	1630832	3576751	3054895	836655
70.5	2125866	3358529	6493241	1913709	4241362	3626541	832275
71.5	2766329	4546834	6873067	2244827	4972202	4280652	827873
72.5	3500723	5957025	7220412	2630879	5765166	5014841	845313
73.5	4311383	7551416	7542822	3078812	6614428	5819772	905181
74.5	5173730	9266730	7848947	3595587	7512602	6679519	1013244
75.5	6059151	11021025	8147691	4187840	8450961	7573334	1156309
76.5	6938512	12724974	8447575	4861460	9419696	8478443	1310990
77.5	7785537	14294733	8756280	5621079	10408184	9373163	1453829
78.5	8579447	15663201	9080356	6469487	11405277	10239553	1566652
79.5	9306450	16787207	9425035	7407013	12399574	11065056	1638408
80.5	9960062	17649630	9794122	8430901	13379690	11842881	1665295
81.5	10540424	18256919	10189924	9534746	14334504	12571303	1650019
82.5	11052975	18633550	10613208	10708058	15253398	13252238	1600582
83.5	11506829	18815207	11063174	11936021	16126477	13889542	1528855
84.5	11913162	18842261	11537458	13199518	16944771	14487434	1448982
85.5	12283791	18754495	12032158	14475474	17700416	15049267	1375452
86.5	12630067	18587491	12541923	15737550	18386810	15576768	1320605
87.5	12962065	18370597	13060087	16957162	18998731	16069729	1291822
88.5	13288070	18126180	13578886	18104806	19532425	16526073	1289602
89.5	13614268	17869788	14089735	19151567	19985646	16942201	1307975
90.5	13944622	17610862	14583582	20070723	20357648	17313487	1337149
91.5	14280847	17353744	15051302	20839271	20649131	17634859	1366698
92.5	14622478	17098785	15484114	21439263	20862144	17901357	1387827
93.5	14966991	16843448	15873998	21858793	20999939	18108634	1394409
94.5	15309978	16583359	16214062	22092567	21066803	18253354	1383223
95.5	15645374	16313250	16498848	22141999	21067857	18333466	1353786
96.5	15965744	16027786	16724537	22014850	21008849	18348353	1308053
97.5	16262613	15722262	16889047	21724454	20895942	18298863	1250045
98.5	16526867	15393133	16992025	21288643	20735506	18187235	1185428
99.5	16749197	15038388	17034726	20728481	20533935	18016945	1120969
100.5	16920568	14657738	17019818	20066932	20297479	17792507	1063767
101.5	17032715	14252637	16951116	19327585	20032102	17519231	1020166
102.5	17078603	13826149	16833287	18533520	19743374	17202987	994461
103.5	17052844	13382696	16671543	17706384	19436389	16849971	987876
104.5	16952032	12927711	16471345	16865711	19115709	16466502	998410
105.5	16774963	12467261	16238145	16028479	18785337	16058837	1021742
106.5	16522730	12007667	15977165	15208907	18448709	15633035	1052644
107.5	16198678	11555155	15693228	14418424	18108707	15194838	1086205
108.5	15808229	11115579	15390643	13665808	17767686	14749589	1118508
109.5	15358593	10694201	15073136	12957413	17427506	14302170	1146821
110.5	14858382	10295567	14743825	12297472	17089586	13856966	1169504
111.5	14317180	9923438	14405231	11688421	16754948	13417844	1185786
112.5	13745082	9580797	14059322	11131228	16424271	12988140	1195523
113.5	13152255	9269890	13707574	10625703	16097949	12570674	1198969
114.5	12548533	8992303	13351045	10170776	15776138	12167759	1196600
115.5	11943091	8749065	12990470	9764741	15458808	11781235	1188976
116.5	11344180	8540742	12626337	9405451	15145792	11412500	1176664
117.5	10758962	8367541	12258982	9090483	14836828	11062559	1160192
118.5	10193414	8229399	11888664	8817267	14531595	10732068	1140046
119.5	9652308	8126058	11515637	8583170	14229749	10421384	1116693
120.5	9139249	8057125	11140210	8385573	13930954	10130622	1090624
121.5	8656759	8022118	10762795	8221908	13634900	9859696	1062399
122.5	8206392	8020486	10383936	8089689	13341326	9608366	1032709
123.5	7788862	8051620	10004330	7986522	13050034	9376274	1002421
124.5	7404183	8114844	9624833	7910108	12760896	9162973	972624
125.5	7051799	8209389	9246451	7858236	12473862	8967947	944656
126.5	6730713	8334358	8870324	7828775	12188956	8790625	920097
127.5	6439592	8488672	8497696	7819659	11906282	8630380	900723
128.5	6176868	8671005	8129884	7828873	11626011	8486528	888387
129.5	5940815	8879718	7768240	7854436	11348377	8358317	884837
130.5	5729613	9112777	7414113	7894387	11073670	8244912	891484
131.5	5541397	9367674	7068809	7946776	10802220	8145375	909175
132.5	5374296	9641354	6733561	8009649	10534389	8058650	938037
133.5	5226461	9930151	6409493	8081045	10270560	7983542	977455
134.5	5096079	10229732	6097602	8158991	10011125	7918706	1026169
135.5	4981390	10535084	5798735	8241500	9756473	7862636	1082437
136.5	4880694	10840514	5513581	8326577	9506979	7813669	1144223
137.5	4792353	11139706	5242666	8412223	9262999	7769989	1209343
138.5	4714796	11425813	4986352	8496450	9024862	7729654	1275582
139.5	4646517	11691607	4744848	8577286	8792857	7690623	1340767
140.5	4586082	11929671	4518218	8652801	8567238	7650802	1402822
141.5	4532126	12132638	4306391	8721116	8348215	7608097	1459810
142.5	4483358	12293467	4109184	8780431	8135949	7560478	1509979
143.5	4438565	12405737	3926315	8829038	7930561	7506043	1551796
144.5	4396616	12463943	3757420	8865348	7732121	7443089	1583990
145.5	4356467	12463770	3602071	8887913	7540656	7370175	1605589
146.5	4317170	12402333	3459792	8895439	7356150	7286177	1615950
147.5	4277876	12278343	3330074	8886814	7178547	7190331	1614776
148.5	4237841	12092210	3212389	8861118	7007753	7082262	1602125
149.5	4196434	11846045	3106197	8817640	6843641	6961992	1578399
150.5	4153137	11543580	3010962	8755886	6686054	6829924	1544316
151.5	4107546	11189995	2926156	8675589	6534809	6686819	1500869
152.5	4059376	10791680	2851265	8576711	6389698	6533746	1449269
153.5	4008451	10355935	2785795	8459441	6250498	6372024	1390884
154.5	3954705	9890647	2729275	8324193	6116968	6203158	1327162
155.5	3898172	9403948	2681261	8171593	5988859	6028766	1259571
156.5	3838975	8903899	2641330	8002469	5865911	5850517	1189526
157.5	3777318	8398203	2609089	7817833	5747861	5670061	1118342
158.5	3713472	7893967	2584168	7618863	5634442	5488982	1047184
159.5	3647760	7397519	2566220	7406878	5525390	5308753	977046
160.5	3580545	6914297	2554918	7183318	5420441	5130704	908737
161.5	3512214	6448780	2549955	6949711	5319336	4955999	842878
162.5	3443169	6004487	2551038	6707653	5221824	4785634	779925
163.5	3373808	5584008	2557888	6458778	5127661	4620428	720189
164.5	3304518	5189081	2570231	6204731	5036609	4461034	663871
165.5	3235665	4820678	2587800	5947144	4948444	4307946	611097
166.5	3167584	4479115	2610327	5687611	4862949	4161517	561958
167.5	3100573	4164166	2637544	5427664	4779918	4021973	516541
168.5	3034887	3875167	2669172	5168761	4699157	3889429	474964
169.5	2970739	3611120	2704923	4912262	4620481	3763905	437398
170.5	2908289	3370788	2744496	4659418	4543718	3645342	404078
171.5	2847652	3152770	2787569	4411364	4468704	3533612	375300
172.5	2788892	2955571	2833801	4169106	4395285	3428531	351397
173.5	2732025	2777653	2882828	3933523	4323318	3329870	332682
174.5	2677024	2617481	2934259	3705362	4252668	3237359	319372
175.5	2623815	2473547	2987677	3485238	4183208	3150697	311505
176.5	2572286	2344403	3042636	3273644	4114819	3069557	308875
177.5	2522284	2228664	3098663	3070949	4047390	2993590	311027
178.5	2473627	2125027	3155256	2877409	3980815	2922427	317308
179.5	2426102	2032269	3211890	2693177	3914995	2855687	326954
180.5	2379468	1949247	3268015	2518310	3849838	2792976	339185
181.5	2333469	1874900	3323061	2352777	3785255	2733892	353266
182.5	2287829	1808241	3376445	2196476	3721165	2678031	368551
183.5	2242267	1748354	3427573	2049236	3657488	2624984	384490
184.5	2196493	1694387	3475849	1910834	3594154	2574343	400629
185.5	2150223	1645550	3520681	1780999	3531093	2525709	416595
186.5	2103180	1601105	3561488	1659425	3468242	2478688	432089
187.5	2055101	1560365	3597710	1545779	3405544	2432900	446870
188.5	2005745	1522692	3628814	1439707	3342947	2387981	460743
189.5	1954900	1487487	3654304	1340840	3280402	2343587	473555
190.5	1902386	1454198	3673731	1248803	3217869	2299397	485186
191.5	1848063	1422310	3686697	1163219	3155312	2255120	495544
192.5	1791838	1391352	3692863	1083712	3092703	2210494	504560
193.5	1733666	1360895	3691960	1009913	3030020	2165291	512188
194.5	1673553	1330551	3683786	941462	2967248	2119320	518399
195.5	1611562	1299980	3668218	878009	2904380	2072430	523183
196.5	1547809	1268890	3645208	819218	2841415	2024508	526542
197.5	1482465	1237036	3614787	764769	2778361	1975484	528495
198.5	1415749	1204226	3577064	714356	2715233	1925326	529070
199.5	1347930	1170321	3532224	667691	2652054	1874044	528307
200.5	1279314	1135235	3480523	624499	2588854	1821685	526257
201.5	1210244	1098932	3422284	584524	2525670	1768331	522976
202.5	1141085	1061429	3357890	547527	2462546	1714096	518528
203.5	1072219	1022792	3287776	513284	2399532	1659121	512983
204.5	1004032	983128	3212424	481585	2336685	1603571	506415
205.5	936909	942587	3132350	452237	2274064	1547629	498898
206.5	871220	901348	3048098	425059	2211736	1491492	490513
207.5	807315	859621	2960228	399885	2149769	1435364	481338
208.5	745512	817632	2869312	376562	2088235	1379450	471453
209.5	686095	775619	2775920	354946	2027207	1323957	460938
210.5	629305	733828	2680614	334908	1966759	1269083	449870
211.5	575341	692499	2583943	316327	1906966	1215015	438327
212.5	524353	651865	2486431	299092	1847901	1161929	426381
213.5	476446	612144	2388580	283100	1789636	1109981	414107
214.5	431678	573534	2290856	268259	1732241	1059314	401572
215.5	390065	536211	2193691	254483	1675781	1010046	388844
216.5	351582	500326	2097482	241692	1620319	962280	375985
217.5	316169	466003	2002582	229814	1565912	916096	363056
218.5	283735	433336	1909309	218782	1512614	871555	350112
219.5	254164	402394	1817937	208536	1460471	828701	337206
220.5	227319	373221	1728701	199020	1409527	787558	324385
221.5	203047	345833	1641802	190183	1359816	748136	311695
222.5	181186	320227	1557399	181976	1311369	710431	299174
223.5	161566	296380	1475622	174358	1264210	674427	286860
224.5	144016	274252	1396566	167288	1218356	640096	274783
225.5	128366	253790	1320299	160730	1173819	607401	262972
226.5	114449	234928	1246862	154650	1130606	576299	251450
227.5	102105	217594	1176274	149019	1088717	546742	240236
228.5	91182	201709	1108533	143807	1048147	518676	229349
229.5	81536	187190	1043619	138990	1008888	492045	218799
230.5	73035	173953	981497	134543	970926	466791	208598
231.5	65555	161914	922122	130444	934242	442855	198751
232.5	58983	150988	865434	126674	898814	420179	189264
233.5	53218	141095	811370	123214	864618	398703	180137
234.5	48168	132158	759859	120049	831625	378372	171371
235.5	43749	124102	710824	117161	799806	359128	162963
236.5	39887	116858	664187	114538	769128	340920	154909
237.5	36519	110361	619868	112167	739556	323694	147205
238.5	33585	104552	577787	110036	711055	307403	139843
239.5	31035	99374	537863	108134	683589	291999	132817
240.5	28825	94777	500017	106453	657120	277438	126117
241.5	26916	90716	464172	104982	631612	263680	119735
242.5	25276	87148	430252	103716	607028	250684	113661
243.5	23875	84038	398185	102646	583330	238414	107886
244.5	22689	81351	367900	101766	560481	226837	102397
245.5	21698	79059	339330	101071	538446	215921	97185
246.5	20884	77136	312410	100556	517191	205635	92237
247.5	20234	75560	287077	100216	496681	195954	87544
248.5	19736	74311	263270	100048	476884	186850	83092
249.5	19381	73374	240932	100049	457769	178301	78871
250.5	19164	72736	220007	100215	439305	170285	74869
251.5	19081	72384	200439	100544	421465	162783	71074
252.5	19130	72310	182177	101034	404221	155774	67475
253.5	19311	72508	165167	101684	387549	149244	64061
254.5	19628	72973	149358	102492	371425	143175	60821
255.5	20085	73702	134701	103456	355828	137555	57745
256.5	20691	74694	121144	104577	340735	132368	54824
257.5	21453	75949	108639	105852	326130	127605	52049
258.5	22386	77468	97135	107282	311994	123253	49412
259.5	23503	79253	86583	108865	298312	119303	46907
260.5	24823	81308	76934	110601	285070	115747	44529
261.5	26367	83637	68139	112490	272253	112577	42273
262.5	28160	86244	60148	114530	259850	109786	40139
263.5	30230	89133	52914	116720	247851	107370	38125
264.5	32611	92311	46387	119060	236246	105323	36235
265.5	35338	95780	40521	121547	225025	103642	34472
266.5	38453	99545	35268	124180	214181	102325	32843
267.5	42003	103609	30582	126957	203707	101372	31359
268.5	46040	107974	26420	129875	193595	100781	30032
269.5	50618	112640	22737	132931	183839	100553	28879
270.5	55800	117607	19492	136121	174435	100691	27918
271.5	61650	122871	16644	139440	165375	101196	27170
272.5	68239	128427	14157	142883	156656	102072	26658
273.5	75638	134265	11993	146445	148271	103323	26405
274.5	83922	140376	10120	150119	140215	104950	26433
275.5	93163	146743	8504	153897	132485	106958	26759
276.5	103432	153351	7118	157770	125073	109349	27399
277.5	114797	160176	5933	161730	117975	112122	28362
278.5	127312	167194	4926	165765	111185	115276	29651
279.5	141024	174376	4073	169864	104697	118807	31266
280.5	155958	181691	3354	174015	98505	122705	33202
281.5	172120	189101	2751	178204	92603	126956	35451
282.5	189488	196568	2248	182417	86984	131541	37998
283.5	208007	204051	1829	186638	81641	136433	40826
284.5	227584	211505	1483	190851	76567	141598	43913
285.5	248085	218884	1197	195038	71754	146992	47230
286.5	269330	226140	963	199182	67194	152562	50740
287.5	291090	233225	772	203264	62881	158246	54401
288.5	313089	240092	616	207263	58804	163973	58159
289.5	335003	246692	490	211159	54957	169660	61955
290.5	356465	252979	389	214932	51330	175219	65722
291.5	377074	258910	307	218560	47915	180553	69385
292.5	396400	264444	242	222022	44703	185562	72866
293.5	414001	269543	190	225296	41686	190143	76084
294.5	429435	274173	149	228362	38855	194195	78958
295.5	442279	278306	116	231197	36201	197620	81412
296.5	452143	281919	90	233781	33716	200330	83379
297.5	458690	284991	70	236094	31392	202247	84800
298.5	461654	287512	54	238116	29220	203311	85634
299.5	460855	289472	42	239829	27192	203478	85855
300.5	456205	290871	32	241214	25301	202725	85460
301.5	447726	291711	25	242257	23538	201051	84465
302.5	435542	292002	19	242942	21897	198480	82913
303.5	419885	291757	15	243257	20369	195057	80864
304.5	401085	290993	11	243189	18949	190846	78402
305.5	379554	289734	9	242731	17630	185931	75625
306.5	355774	288003	7	241874	16405	180412	72646
307.5	330275	285829	5	240615	15268	174398	69583
308.5	303613	283243	4	238949	14213	168004	66550
309.5	276347	280277	3	236878	13235	161348	63657
310.5	249018	276964	2	234403	12329	154543	60991
311.5	222129	273337	2	231529	11490	147697	58617
312.5	196127	269432	1	228263	10713	140907	56570
313.5	171394	265282	1	224616	9994	134257	54853
314.5	148235	260920	0	220598	9329	127817	53441
315.5	126874	256378	0	216226	8713	121638	52286
316.5	107460	251687	0	211515	8144	115761	51330
317.5	90063	246875	0	206484	7618	110208	50509
318.5	74691	241971	0	201155	7131	104990	49764
319.5	61291	236998	0	195551	6681	100104	49044
320.5	49766	231981	0	189696	6265	95542	48309
321.5	39982	226939	0	183616	5880	91284	47532
322.5	31783	221892	0	177339	5525	87308	46697
323.5	25000	216856	0	170893	5196	83589	45797
324.5	19458	211845	0	164306	4892	80100	44831
325.5	14986	206871	0	157609	4611	76816	43806
326.5	11422	201945	0	150832	4352	73710	42729
327.5	8615	197075	0	144003	4111	70761	41612
328.5	6430	192267	0	137153	3889	67948	40466
329.5	4750	187526	0	130310	3684	65254	39302
330.5	3473	182855	0	123503	3494	62665	38131
331.5	2514	178257	0	116759	3319	60170	36962
332.5	1801	173732	0	110104	3156	57759	35804
333.5	1278	169279	0	103561	3006	55425	34664
334.5	897	164896	0	97154	2867	53163	33546
335.5	624	160582	0	90904	2738	50970	32456
336.5	430	156333	0	84830	2620	48842	31397
337.5	293	152145	0	78949	2510	46779	30369
338.5	198	148015	0	73275	2408	44779	29375
339.5	132	143937	0	67822	2314	42841	28413
340.5	88	139907	0	62600	2228	40965	27484
341.5	58	135920	0	57618	2148	39149	26585
342.5	38	131971	0	52881	2074	37393	25716
343.5	24	128055	0	48395	2006	35696	24873
344.5	16	124167	0	44160	1943	34057	24054
345.5	10	120304	0	40179	1886	32476	23257
346.5	6	116462	0	36448	1833	30950	22479
347.5	4	112637	0	32965	1784	29478	21717
348.5	2	108826	0	29725	1740	28059	20968
349.5	1	105027	0	26722	1699	26690	20231
350.5	0	101239	0	23949	1663	25370	19503
351.5	0	97462	0	21397	1629	24098	18783
352.5	0	93694	0	19058	1599	22870	18068
353.5	0	89938	0	16921	1572	21686	17358
354.5	0	86195	0	14976	1548	20544	16652
355.5	0	82468	0	13213	1527	19442	15950
356.5	0	78760	0	11620	1509	18378	15251
357.5	0	75076	0	10186	1493	17351	14555
358.5	0	71422	0	8900	1479	16360	13864
359.5	0	67801	0	7751	1468	15404	13177
360.5	0	64222	0	6728	1459	14482	12497
361.5	0	60692	0	5820	1453	13593	11823
362.5	0	57217	0	5019	1448	12737	11158
363.5	0	53805	0	4313	1446	11913	10503
364.5	0	50464	0	3694	1446	11121	9859
365.5	0	47202	0	3153	1447	10361	9229
366.5	0	44028	0	2683	1451	9632	8613
367.5	0	40947	0	2274	1457	8936	8015
368.5	0	37969	0	1922	1464	8271	7434
369.5	0	35099	0	1618	1474	7638	6874
370.5	0	32343	0	1358	1485	7037	6334
371.5	0	29707	0	1136	1499	6468	5817
372.5	0	27195	0	946	1514	5931	5324
373.5	0	24812	0	786	1531	5426	4855
374.5	0	22559	0	650	1550	4952	4411
375.5	0	20438	0	536	1571	4509	3992
376.5	0	18450	0	441	1593	4097	3600
377.5	0	16595	0	361	1618	3715	3234
378.5	0	14871	0	295	1645	3362	2893
379.5	0	13276	0	240	1673	3038	2578
380.5	0	11807	0	194	1704	2741	2289
381.5	0	10461	0	157	1736	2471	2024
382.5	0	9232	0	126	1770	2226	1783
383.5	0	8116	0	101	1807	2005	1566
384.5	0	7107	0	81	1845	1807	1371
385.5	0	6198	0	64	1886	1630	1198
386.5	0	5385	0	51	1928	1473	1046
387.5	0	4659	0	40	1973	1335	914
388.5	0	4016	1	32	2019	1214	801
389.5	0	3447	1	25	2068	1108	708
390.5	0	2947	2	20	2119	1017	632
391.5	0	2509	2	15	2172	940	574
392.5	0	2128	3	12	2227	874	532
393.5	0	1798	4	9	2284	819	505
394.5	0	1513	5	7	2343	774	489
395.5	0	1268	6	5	2404	737	483
396.5	0	1059	8	4	2467	708	485
397.5	0	880	10	3	2532	685	492
398.5	0	729	13	2	2600	669	503
399.5	0	602	17	2	2669	658	516
400.5	0	495	21	1	2739	651	530
401.5	0	405	27	1	2812	649	546
402.5	0	331	34	0	2887	650	562
403.5	0	269	44	0	2963	655	579
404.5	0	218	55	0	3040	663	596
405.5	0	176	69	0	3119	673	612
406.5	0	141	87	0	3200	686	629
407.5	0	113	109	0	3281	701	646
408.5	0	90	136	0	3364	718	662
409.5	0	72	170	0	3448	738	678
410.5	0	57	211	0	3532	760	694
411.5	0	45	262	0	3617	785	710
412.5	0	36	323	0	3703	812	725
413.5	0	28	398	0	3789	843	740
414.5	0	22	488	0	3874	877	755
415.5	0	17	596	0	3960	915	770
416.5	0	13	726	0	4045	957	785
417.5	0	10	881	0	4130	1004	800
418.5	0	8	1065	0	4213	1057	815
419.5	0	6	1282	0	4296	1117	833
420.5	0	5	1537	0	4377	1184	852
421.5	0	4	1836	0	4457	1259	875
422.5	0	3	2184	0	4534	1344	903
423.5	0	2	2587	0	4610	1440	937
424.5	0	2	3052	0	4682	1547	982
425.5	0	1	3585	0	4753	1668	1038
426.5	0	0	4192	0	4820	1803	1108
427.5	0	0	4882	0	4884	1953	1196
428.5	0	0	5660	0	4944	2121	1304
429.5	0	0	6533	0	5000	2307	1433
430.5	0	0	7507	0	5053	2512	1586
431.5	0	0	8587	0	5101	2738	1765
432.5	0	0	9778	0	5144	2984	1969
433.5	0	0	11083	0	5183	3253	2200
434.5	0	0	12505	0	5217	3544	2457
435.5	0	0	14043	0	5245	3858	2742
436.5	0	0	15698	0	5268	4193	3052
437.5	0	0	17465	0	5285	4550	3387
438.5	0	0	19340	0	5297	4927	3746
439.5	0	0	21315	0	5302	5324	4128
440.5	0	0	23380	0	5302	5737	4529
441.5	0	0	25524	0	5296	6164	4947
442.5	0	0	27730	0	5284	6603	5380
443.5	0	0	29983	0	5265	7050	5823
444.5	0	0	32263	0	5240	7501	6273
445.5	0	0	34549	0	5209	7952	6725
446.5	0	0	36819	0	5172	8398	7175
447.5	0	0	39048	0	5129	8835	7618
448.5	0	0	41211	0	5081	9258	8048
449.5	0	0	43283	0	5026	9662	8461
450.5	0	0	45238	0	4965	10041	8852
451.5	0	0	47052	0	4899	10390	9214
452.5	0	0	48700	0	4828	10706	9544
453.5	0	0	50160	0	4752	10982	9838
454.5	0	0	51413	0	4671	11217	10090
455.5	0	0	52440	0	4585	11405	10297
456.5	0	0	53226	0	4494	11544	10457
457.5	0	0	53762	0	4400	11632	10567
458.5	0	0	54037	0	4302	11668	10625
459.5	0	0	54050	0	4200	11650	10631
460.5	0	0	53800	0	4096	11579	10585
461.5	0	0	53289	0	3988	11456	10487
462.5	0	0	52528	0	3878	11281	10339
463.5	0	0	51525	0	3766	11058	10143
464.5	0	0	50296	0	3652	10790	9902
465.5	0	0	48858	0	3537	10479	9619
466.5	0	0	47231	0	3420	10130	9299
467.5	0	0	45438	0	3303	9748	8945
468.5	0	0	43501	0	3185	9337	8563
469.5	0	0	41446	0	3068	8903	8158
470.5	0	0	39298	0	2950	8450	7733
471.5	0	0	37082	0	2833	7983	7295
472.5	0	0	34822	0	2717	7508	6849
473.5	0	0	32544	0	2601	7029	6399
474.5	0	0	30269	0	2488	6551	5949
475.5	0	0	28019	0	2375	6079	5504
476.5	0	0	25812	0	2265	5615	5068
477.5	0	0	23666	0	2156	5164	4644
478.5	0	0	21595	0	2050	4729	4235
479.5	0	0	19612	0	1947	4312	3844
480.5	0	0	17727	0	1845	3914	3472
481.5	0	0	15947	0	1747	3539	3121
482.5	0	0	14279	0	1652	3186	2792
483.5	0	0	12725	0	1559	2857	2485
484.5	0	0	11287	0	1469	2551	2202
485.5	0	0	9965	0	1383	2270	1942
486.5	0	0	8757	0	1300	2011	1705
487.5	0	0	7659	0	1220	1776	1490
488.5	0	0	6668	0	1143	1562	1295
489.5	0	0	5778	0	1070	1370	1121
490.5	0	0	4984	0	1000	1197	966
491.5	0	0	4279	0	933	1042	829
492.5	0	0	3657	0	869	905	708
493.5	0	0	3111	0	809	784	603
494.5	0	0	2635	0	751	677	511
495.5	0	0	2221	0	697	584	431
496.5	0	0	1864	0	646	502	363
497.5	0	0	1557	0	597	431	304
498.5	0	0	1295	0	552	369	255
499.5	0	0	1072	0	509	316	213
500.5	0	0	884	0	469	270	178
501.5	0	0	725	0	431	231	149
502.5	0	0	592	0	396	198	125
503.5	0	0	482	0	363	169	105
504.5	0	0	390	0	333	144	89
505.5	0	0	314	0	304	124	76
506.5	0	0	252	0	278	106	65
507.5	0	0	201	0	253	91	56
508.5	0	0	160	0	231	78	49
509.5	0	0	127	0	210	67	43
510.5	0	0	100	0	190	58	38
511.5	0	0	79	0	173	50	34
512.5	0	0	61	0	156	44	31
513.5	0	0	48	0	141	38	27
514.5	0	0	37	0	128	33	25
515.5	0	0	29	0	115	29	22
516.5	0	0	22	0	103	25	20
517.5	0	0	17	0	93	22	18
518.5	0	0	13	0	84	19	16
519.5	0	0	10	0	75	17	15
520.5	0	0	7	0	67	15	13
521.5	0	0	6	0	60	13	12
522.5	0	0	4	0	53	12	11
523.5	0	0	3	0	48	10	9
524.5	0	0	2	0	42	9	8
525.5	0	0	2	0	38	8	7
526.5	0	0	1	0	33	7	7
527.5	0	0	0	0	30	6	6
528.5	0	0	0	0	26	5	5
529.5	0	0	0	0	23	5	5
530.5	0	0	0	0	21	4	4
531.5	0	0	0	0	18	4	4
532.5	0	0	0	0	16	3	3
533.5	0	0	0	0	14	3	3
534.5	0	0	0	0	12	2	2
535.5	0	0	0	0	11	2	2
536.5	0	0	0	0	9	2	2
537.5	0	0	0	0	8	2	2
538.5	0	0	0	0	7	1	1
539.5	0	0	0	0	6	1	1
540.5	0	0	0	0	5	1	1
541.5	0	0	0	0	5	0	0
542.5	0	0	0	0	4	0	0
543.5	0	0	0	0	4	0	0
544.5	0	0	0	0	3	0	0
545.5	0	0	0	0	3	0	0
546.5	0	0	0	0	2	0	0
547.5	0	0	0	0	2	0	0
548.5	0	0	0	0	2	0	0
549.5	0	0	0	0	1	0	0
550.5	0	0	0	0	1	0	0
551.5	0	0	0	0	1	0	0
552.5	0	0	0	0	0	0	0
553.5	0	0	0	0	0	0	0
554.5	0	0	0	0	0	0	0
555.5	0	0	0	0	0	0	0
556.5	0	0	0	0	0	0	0
557.5	0	0	0	0	0	0	0
558.5	0	0	0	0	0	0	0
559.5	0	0	0	0	0	0	0
560.5	0	0	0	0	0	0	0
561.5	0	0	0	0	0	0	0
562.5	0	0	0	0	0	0	0
563.5	0	0	0	0	0	0	0
564.5	0	0	0	0	0	0	0
565.5	0	0	0	0	0	0	0
566.5	0	0	0	0	0	0	0
567.5	0	0	0	0	0	0	0
568.5	0	0	0	0	0	0	0
569.5	0	0	0	0	0	0	0
570.5	0	0	0	0	0	0	0
571.5	0	0	0	0	0	0	0
572.5	0	0	0	0	0	0	0
573.5	0	0	0	0	0	0	0
574.5	0	0	0	0	0	0	0
575.5	0	0	0	0	0	0	0
576.5	0	0	0	0	0	0	0
577.5	0	0	0	0	0	0	0
578.5	0	0	0	0	0	0	0
579.5	0	0	0	0	0	0	0
580.5	0	0	0	0	0	0	0
581.5	0	0	0	0	0	0	0
582.5	0	0	0	0	0	0	0
583.5	0	0	0	0	0	0	0
584.5	0	0	0	0	0	0	0
585.5	0	0	0	0	0	0	0
586.5	0	0	0	0	0	0	0
587.5	0	0	0	0	0	0	0
588.5	0	0	0	0	0	0	0
589.5	0	0	0	0	0	0	0
590.5	0	0	0	0	0	0	0
591.5	0	0	0	0	0	0	0
592.5	0	0	0	0	0	0	0
593.5	0	0	0	0	0	0	0
594.5	0	0	0	0	0	0	0
595.5	0	0	0	0	0	0	0
596.5	0	0	0	0	0	0	0
597.5	0	0	0	0	0	0	0
598.5	0	0	0	0	0	0	0
599.5	0	0	0	0	0	0	0
600.5	0	0	0	0	0	0	0
601.5	0	0	0	0	0	0	0
602.5	0	0	0	0	0	0	0
603.5	0	0	0	0	0	0	0
604.5	0	0	0	0	0	0	0
605.5	0	0	0	0	0	0	0
606.5	0	0	0	0	0	0	0
607.5	0	0	0	0	0	0	0
608.5	0	0	0	0	0	0	0
609.5	0	0	0	0	0	0	0
610.5	0	0	0	0	0	0	0
611.5	0	0	0	0	0	0	0
612.5	0	0	0	0	0	0	0
613.5	0	0	0	0	0	0	0
614.5	0	0	0	0	0	0	0
615.5	0	0	0	0	0	0	0
616.5	0	0	0	0	0	0	0
617.5	0	0	0	0	0	0	0
618.5	0	0	0	0	0	0	0
619.5	0	0	0	0	0	0	0
620.5	0	0	0	0	0	0	0
621.5	0	0	0	0	0	0	0
622.5	0	0	0	0	0	0	0
623.5	0	0	0	0	0	0	0
624.5	0	0	0	0	0	0	0
625.5	0	0	0	0	0	0	0
626.5	0	0	0	0	0	0	0
627.5	0	0	0	0	0	0	0
628.5	0	0	0	0	0	0	0
629.5	0	0	0	0	0	0	0
630.5	0	0	0	0	0	0	0
631.5	0	0	0	0	0	0	0
632.5	0	0	0	0	0	0	0
633.5	0	0	0	0	0	0	0
634.5	0	0	0	0	0	0	0
635.5	0	0	0	0	0	0	0
636.5	0	0	0	0	0	0	0
637.5	0	0	0	0	0	0	0
638.5	0	0	0	0	0	0	0
639.5	0	0	0	0	0	0	0
640.5	0	0	0	0	0	0	0
641.5	0	0	0	0	0	0	0
642.5	0	0	0	0	0	0	0
643.5	0	0	0	0	0	0	0
644.5	0	0	0	0	0	0	0
645.5	0	0	0	0	0	0	0
646.5	0	0	0	0	0	0	0
647.5	0	0	0	0	0	0	0
648.5	0	0	0	0	0	0	0
649.5	0	0	0	0	0	0	0
650.5	0	0	0	0	0	0	0
651.5	0	0	0	0	0	0	0
652.5	0	0	0	0	0	0	0
653.5	0	0	0	0	0	0	0
654.5	0	0	0	0	0	0	0
655.5	0	0	0	0	0	0	0
656.5	0	0	0	0	0	0	0
657.5	0	0	0	0	0	0	0
658.5	0	0	0	0	0	0	0
659.5	0	0	0	0	0	0	0
660.5	0	0	0	0	0	0	0
661.5	0	0	0	0	0	0	0
662.5	0	0	0	0	0	0	0
663.5	0	0	0	0	0	0	0
664.5	0	0	0	0	0	0	0
665.5	0	0	0	0	0	0	0
666.5	0	0	0	0	0	0	0
667.5	0	0	0	0	0	0	0
668.5	0	0	0	0	0	0	0
669.5	0	0	0	0	0	0	0
670.5	0	0	0	0	0	0	0
671.5	0	0	0	0	0	0	0
672.5	0	0	0	0	0	0	0
673.5	0	0	0	0	0	0	0
674.5	0	0	0	0	0	0	0
675.5	0	0	0	0	0	0	0
676.5	0	0	0	0	0	0	0
677.5	0	0	0	0	0	0	0
678.5	0	0	0	0	0	0	0
679.5	0	0	0	0	0	0	0
680.5	0	0	0	0	0	0	0
681.5	0	0	0	0	0	0	0
682.5	0	0	0	0	0	0	0
683.5	0	0	0	0	0	0	0
684.5	0	0	0	0	0	0	0
685.5	0	0	0	0	0	0	0
686.5	0	0	0	0	0	0	0
687.5	0	0	0	0	0	0	0
688.5	0	0	0	0	0	0	0
689.5	0	0	0	0	0	0	0
690.5	0	0	0	0	0	0	0
691.5	0	0	0	0	0	0	0
692.5	0	0	0	0	0	0	0
693.5	0	0	0	0	0	0	0
694.5	0	0	0	0	0	0	0
695.5	0	0	0	0	0	0	0
696.5	0	0	0	0	0	0	0
697.5	0	0	0	0	0	0	0
698.5	0	0	0	0	0	0	0
699.5	0	0	0	0	0	0	0
700.5	0	0	0	0	0	0	0
701.5	0	0	0	0	0	0	0
702.5	0	0	0	0	0	0	0
703.5	0	0	0	0	0	0	0
704.5	0	0	0	0	0	0	0
705.5	0	0	0	0	0	0	0
706.5	0	0	0	0	0	0	0
707.5	0	0	0	0	0	0	0
708.5	0	0	0	0	0	0	0
709.5	0	0	0	0	0	0	0
710.5	0	0	0	0	0	0	0
711.5	0	0	0	0	0	0	0
712.5	0	0	0	0	0	0	0
713.5	0	0	0	0	0	0	0
714.5	0	0	0	0	0	0	0
715.5	0	0	0	0	0	0	0
716.5	0	0	0	0	0	0	0
717.5	0	0	0	0	0	0	0
718.5	0	0	0	0	0	0	0
719.5	0	0	0	0	0	0	0
720.5	0	0	0	0	0	0	0
721.5	0	0	0	0	0	0	0
722.5	0	0	0	0	0	0	0
723.5	0	0	0	0	0	0	0
724.5	0	0	0	0	0	0	0
725.5	0	0	0	0	0	0	0
726.5	0	0	0	0	0	0	0
727.5	0	0	0	0	0	0	0
728.5	0	0	0	0	0	0	0
729.5	0	0	0	0	0	0	0
730.5	0	0	0	0	0	0	0
731.5	0	0	0	0	0	0	0
732.5	0	0	0	0	0	0	0
733.5	0	0	0	0	0	0	0
734.5	0	0	0	0	0	0	0
735.5	0	0	0	0	0	0	0
736.5	0	0	0	0	0	0	0
737.5	0	0	0	0	0	0	0
738.5	0	0	0	0	0	0	0
739.5	0	0	0	0	0	0	0
740.5	0	0	0	0	0	0	0
741.5	0	0	0	0	0	0	0
742.5	0	0	0	0	0	0	0
743.5	0	0	0	0	0	0	0
744.5	0	0	0	0	0	0	0
745.5	0	0	0	0	0	0	0
746.5	0	0	0	0	0	0	0
747.5	0	0	0	0	0	0	0
748.5	0	0	0	0	0	0	0
749.5	0	0	0	0	0	0	0
750.5	0	0	0	0	0	0	0
751.5	0	0	0	0	0	0	0
752.5	0	0	0	0	0	0	0
753.5	0	0	0	0	0	0	0
754.5	0	0	0	0	0	0	0
755.5	0	0	0	0	0	0	0
756.5	0	0	0	0	0	0	0
757.5	0	0	0	0	0	0	0
758.5	0	0	0	0	0	0	0
759.5	0	0	0	0	0	0	0
760.5	0	0	0	0	0	0	0
761.5	0	0	0	0	0	0	0
762.5	0	0	0	0	0	0	0
763.5	0	0	0	0	0	0	0
764.5	0	0	0	0	0	0	0
765.5	0	0	0	0	0	0	0
766.5	0	0	0	0	0	0	0
767.5	0	0	0	0	0	0	0
768.5	0	0	0	0	0	0	0
769.5	0	0	0	0	0	0	0
770.5	0	0	0	0	0	0	0
771.5	0	0	0	0	0	0	0
772.5	0	0	0	0	0	0	0
773.5	0	0	0	0	0	0	0
774.5	0	0	0	0	0	0	0
775.5	0	0	0	0	0	0	0
776.5	0	0	0	0	0	0	0
777.5	0	0	0	0	0	0	0
778.5	0	0	0	0	0	0	0
779.5	0	0	0	0	0	0	0
780.5	0	0	0	0	0	0	0
781.5	0	0	0	0	0	0	0
782.5	0	0	0	0	0	0	0
783.5	0	0	0	0	0	0	0
784.5	0	0	0	0	0	0	0
785.5	0	0	0	0	0	0	0
786.5	0	0	0	0	0	0	0
787.5	0	0	0	0	0	0	0
788.5	0	0	0	0	0	0	0
789.5	0	0	0	0	0	0	0
790.5	0	0	0	0	0	0	0
791.5	0	0	0	0	0	0	0
792.5	0	0	0	0	0	0	0
793.5	0	0	0	0	0	0	0
794.5	0	0	0	0	0	0	0
795.5	0	0	0	0	0	0	0
796.5	0	0	0	0	0	0	0
797.5	0	0	0	0	0	0	0
798.5	0	0	0	0	0	0	0
799.5	0	0	0	0	0	0	0
800.5	0	0	0	0	0	0	0
801.5	0	0	0	0	0	0	0
802.5	0	0	0	0	0	0	0
803.5	0	0	0	0	0	0	0
804.5	0	0	0	0	0	0	0
805.5	0	0	0	0	0	0	0
806.5	0	0	0	0	0	0	0
807.5	0	0	0	0	0	0	0
808.5	0	0	0	0	0	0	0
809.5	0	0	0	0	0	0	0
810.5	0	0	0	0	0	0	0
811.5	0	0	0	0	0	0	0
812.5	0	0	0	0	0	0	0
813.5	0	0	0	0	0	0	0
814.5	0	0	0	0	0	0	0
815.5	0	0	0	0	0	0	0
816.5	0	0	0	0	0	0	0
817.5	0	0	0	0	0	0	0
818.5	0	0	0	0	0	0	0
819.5	0	0	0	0	0	0	0
820.5	0	0	0	0	0	0	0
821.5	0	0	0	0	0	0	0
822.5	0	0	0	0	0	0	0
823.5	0	0	0	0	0	0	0
824.5	0	0	0	0	0	0	0
825.5	0	0	0	0	0	0	0
826.5	0	0	0	0	0	0	0
827.5	0	0	0	0	0	0	0
828.5	0	0	0	0	0	0	0
829.5	0	0	0	0	0	0	0
830.5	0	0	0	0	0	0	0
831.5	0	0	0	0	0	0	0
832.5	0	0	0	0	0	0	0
833.5	0	0	0	0	0	0	0
834.5	0	0	0	0	0	0	0
835.5	0	0	0	0	0	0	0
836.5	0	0	0	0	0	0	0
837.5	0	0	0	0	0	0	0
838.5	0	0	0	0	0	0	0
839.5	0	0	0	0	0	0	0
840.5	0	0	0	0	0	0	0
841.5	0	0	0	0	0	0	0
842.5	0	0	0	0	0	0	0
843.5	0	0	0	0	0	0	0
844.5	0	0	0	0	0	0	0
845.5	0	0	0	0	0	0	0
846.5	0	0	0	0	0	0	0
847.5	0	0	0	0	0	0	0
848.5	0	0	0	0	0	0	0
849.5	0	0	0	0	0	0	0
850.5	0	0	0	0	0	0	0
851.5	0	0	0	0	0	0	0
852.5	0	0	0	0	0	0	0
853.5	0	0	0	0	0	0	0
854.5	0	0	0	0	0	0	0
855.5	0	0	0	0	0	0	0
856.5	0	0	0	0	0	0	0
857.5	0	0	0	0	0	0	0
858.5	0	0	0	0	0	0	0
859.5	0	0	0	0	0	0	0
860.5	0	0	0	0	0	0	0
861.5	0	0	0	0	0	0	0
862.5	0	0	0	0	0	0	0
863.5	0	0	0	0	0	0	0
864.5	0	0	0	0	0	0	0
865.5	0	0	0	0	0	0	0
866.5	0	0	0	0	0	0	0
867.5	0	0	0	0	0	0	0
868.5	0	0	0	0	0	0	0
869.5	0	0	0	0	0	0	0
870.5	0	0	0	0	0	0	0
871.5	0	0	0	0	0	0	0
872.5	0	0	0	0	0	0	0
873.5	0	0	0	0	0	0	0
874.5	0	0	0	0	0	0	0
875.5	0	0	0	0	0	0	0
876.5	0	0	0	0	0	0	0
877.5	0	0	0	0	0	0	0
878.5	0	0	0	0	0	0	0
879.5	0	0	0	0	0	0	0
880.5	0	0	0	0	0	0	0
881.5	0	0	0	0	0	0	0
882.5	0	0	0	0	0	0	0
883.5	0	0	0	0	0	0	0
884.5	0	0	0	0	0	0	0
885.5	0	0	0	0	0	0	0
886.5	0	0	0	0	0	0	0
887.5	0	0	0	0	0	0	0
888.5	0	0	0	0	0	0	0
889.5	0	0	0	0	0	0	0
890.5	0	0	0	0	0	0	0
891.5	0	0	0	0	0	0	0
892.5	0	0	0	0	0	0	0
893.5	0	0	0	0	0	0	0
894.5	0	0	0	0	0	0	0
895.5	0	0	0	0	0	0	0
896.5	0	0	0	0	0	0	0
897.5	0	0	0	0	0	0	0
898.5	0	0	0	0	0	0	0
899.5	0	0	0	0	0	0	0
900.5	0	0	0	0	0	0	0
901.5	0	0	0	0	0	0	0
902.5	0	0	0	0	0	0	0
903.5	0	0	0	0	0	0	0
904.5	0	0	0	0	0	0	0
905.5	0	0	0	0	0	0	0
906.5	0	0	0	0	0	0	0
907.5	0	0	0	0	0	0	0
908.5	0	0	0	0	0	0	0
909.5	0	0	0	0	0	0	0
910.5	0	0	0	0	0	0	0
911.5	0	0	0	0	0	0	0
912.5	0	0	0	0	0	0	0
913.5	0	0	0	0	0	0	0
914.5	0	0	0	0	0	0	0
915.5	0	0	0	0	0	0	0
916.5	0	0	0	0	0	0	0
917.5	0	0	0	0	0	0	0
918.5	0	0	0	0	0	0	0
919.5	0	0	0	0	0	0	0
920.5	0	0	0	0	0	0	0
921.5	0	0	0	0	0	0	0
922.5	0	0	0	0	0	0	0
923.5	0	0	0	0	0	0	0
924.5	0	0	0	0	0	0	0
925.5	0	0	0	0	0	0	0
926.5	0	0	0	0	0	0	0
927.5	0	0	0	0	0	0	0
928.5	0	0	0	0	0	0	0
929.5	0	0	0	0	0	0	0
930.5	0	0	0	0	0	0	0
931.5	0	0	0	0	0	0	0
932.5	0	0	0	0	0	0	0
933.5	0	0	0	0	0	0	0
934.5	0	0	0	0	0	0	0
935.5	0	0	0	0	0	0	0
936.5	0	0	0	0	0	0	0
937.5	0	0	0	0	0	0	0
938.5	0	0	0	0	0	0	0
939.5	0	0	0	0	0	0	0
940.5	0	0	0	0	0	0	0
941.5	0	0	0	0	0	0	0
942.5	0	0	0	0	0	0	0
943.5	0	0	0	0	0	0	0
944.5	0	0	0	0	0	0	0
945.5	0	0	0	0	0	0	0
946.5	0	0	0	0	0	0	0
947.5	0	0	0	0	0	0	0
948.5	0	0	0	0	0	0	0
949.5	0	0	0	0	0	0	0
950.5	0	0	0	0	0	0	0
951.5	0	0	0	0	0	0	0
952.5	0	0	0	0	0	0	0
953.5	0	0	0	0	0	0	0
954.5	0	0	0	0	0	0	0
955.5	0	0	0	0	0	0	0
956.5	0	0	0	0	0	0	0
957.5	0	0	0	0	0	0	0
958.5	0	0	0	0	0	0	0
959.5	0	0	0	0	0	0	0
960.5	0	0	0	0	0	0	0
961.5	0	0	0	0	0	0	0
962.5	0	0	0	0	0	0	0
963.5	0	0	0	0	0	0	0
964.5	0	0	0	0	0	0	0
965.5	0	0	0	0	0	0	0
966.5	0	0	0	0	0	0	0
967.5	0	0	0	0	0	0	0
968.5	0	0	0	0	0	0	0
969.5	0	0	0	0	0	0	0
970.5	0	0	0	0	0	0	0
971.5	0	0	0	0	0	0	0
972.5	0	0	0	0	0	0	0
973.5	0	0	0	0	0	0	0
974.5	0	0	0	0	0	0	0
975.5	0	0	0	0	0	0	0
976.5	0	0	0	0	0	0	0
977.5	0	0	0	0	0	0	0
978.5	0	0	0	0	0	0	0
979.5	0	0	0	0	0	0	0
980.5	0	0	0	0	0	0	0
981.5	0	0	0	0	0	0	0
982.5	0	0	0	0	0	0	0
983.5	0	0	0	0	0	0	0
984.5	0	0	0	0	0	0	0
985.5	0	0	0	0	0	0	0
986.5	0	0	0	0	0	0	0
987.5	0	0	0	0	0	0	0
988.5	0	0	0	0	0	0	0
989.5	0	0	0	0	0	0	0
990.5	0	0	0	0	0	0	0
991.5	0	0	0	0	0	0	0
992.5	0	0	0	0	0	0	0
993.5	0	0	0	0	0	0	0
994.5	0	0	0	0	0	0	0
995.5	0	0	0	0	0	0	0
996.5	0	0	0	0	0	0	0
997.5	0	0	0	0	0	0	0
998.5	0	0	0	0	0	0	0
999.5	0	0	0	0	0	0	0
Percentile	Size (nm)	Size (nm)	Size (nm)	Size (nm)	Size (nm)
0	23	39	21	12	38
1	71.4	71.4	61.8	69	69
2	74	73.5	65.5	74	72.3
3	75.7	74.9	67.9	76.8	74.4
4	77.1	76	69.9	78.8	76.2
5	78.3	77	71.6	80.3	77.6
6	79.4	77.8	73.2	81.6	78.9
7	80.4	78.6	74.6	82.7	80
8	81.4	79.4	76	83.7	81.1
9	82.3	80.1	77.3	84.6	82.1
10	83.1	80.8	78.6	85.5	83
11	84	81.5	79.8	86.2	83.9
12	84.8	82.1	81	87	84.7
13	85.6	82.8	82.1	87.7	85.5
14	86.3	83.5	83.1	88.3	86.3
15	87.1	84.1	84.2	89	87.1
16	87.8	84.8	85.1	89.6	87.8
17	88.6	85.4	86.1	90.2	88.6
18	89.3	86.1	87	90.7	89.3
19	90	86.7	87.8	91.3	90
20	90.7	87.4	88.7	91.9	90.7
21	91.3	88.1	89.5	92.4	91.4
22	92	88.7	90.3	93	92.1
23	92.7	89.4	91	93.5	92.8
24	93.3	90.1	91.8	94	93.4
25	94	90.8	92.5	94.5	94.1
26	94.6	91.5	93.2	95.1	94.8
27	95.2	92.2	94	95.6	95.5
28	95.8	92.9	94.7	96.1	96.1
29	96.4	93.7	95.3	96.6	96.8
30	97	94.4	96	97.2	97.5
31	97.6	95.1	96.7	97.7	98.2
32	98.2	95.9	97.4	98.2	98.8
33	98.8	96.6	98	98.8	99.5
34	99.4	97.4	98.7	99.3	100.2
35	99.9	98.2	99.4	99.9	100.9
36	100.5	99	100	100.5	101.6
37	101.1	99.8	100.7	101	102.3
38	101.6	100.6	101.4	101.6	103.1
39	102.2	101.5	102	102.2	103.8
40	102.8	102.4	102.7	102.9	104.5
41	103.3	103.3	103.4	103.5	105.3
42	103.9	104.2	104	104.2	106
43	104.5	105.1	104.7	104.9	106.8
44	105	106.1	105.4	105.6	107.6
45	105.6	107.1	106.1	106.3	108.4
46	106.2	108.2	106.8	107.1	109.2
47	106.7	109.3	107.5	107.9	110
48	107.3	110.5	108.3	108.7	110.8
49	107.9	111.7	109	109.6	111.7
50	108.5	113	109.7	110.5	112.5
51	109.1	114.3	110.5	111.5	113.4
52	109.8	115.7	111.3	112.5	114.3
53	110.4	117.1	112.1	113.6	115.2
54	111.1	118.6	112.9	114.7	116.1
55	111.7	120.1	113.7	115.9	117
56	112.4	121.6	114.5	117.1	118
57	113.1	123.1	115.4	118.4	119
58	113.8	124.7	116.3	119.7	120
59	114.6	126.2	117.2	121.1	121
60	115.4	127.6	118.1	122.5	122
61	116.2	129	119	124	123.1
62	117	130.4	120	125.4	124.2
63	117.9	131.7	121	126.9	125.3
64	118.9	133	122.1	128.4	126.4
65	119.9	134.2	123.2	129.9	127.6
66	120.9	135.4	124.3	131.3	128.8
67	122	136.6	125.5	132.8	130.1
68	123.2	137.7	126.7	134.2	131.4
69	124.4	138.8	128.1	135.6	132.7
70	125.8	139.8	129.5	137	134.1
71	127.2	140.8	131	138.4	135.5
72	128.7	141.9	132.6	139.7	137
73	130.3	142.9	134.4	141.1	138.5
74	132	143.8	136.3	142.4	140.1
75	133.9	144.8	138.4	143.7	141.8
76	135.8	145.8	140.8	145	143.6
77	137.7	146.8	143.5	146.3	145.4
78	139.8	147.8	146.6	147.6	147.3
79	141.9	148.8	150	148.9	149.3
80	144	149.8	153.9	150.3	151.4
81	146.2	150.9	158.2	151.6	153.7
82	148.5	152	162.6	152.9	156
83	150.7	153.1	167	154.3	158.4
84	153.1	154.3	171.2	155.7	161
85	155.5	155.6	175.1	157.2	163.7
86	158	156.9	178.8	158.7	166.6
87	160.7	158.4	182.2	160.2	169.6
88	163.4	160	185.5	161.9	172.7
89	166.3	161.9	188.7	163.6	176.1
90	169.5	164	191.7	165.5	179.6
91	172.8	166.5	194.8	167.5	183.3
92	176.4	169.5	197.9	169.7	187.3
93	180.3	173.4	201.1	172.3	191.6
94	184.4	178.4	204.5	175.3	196.4
95	189	184.9	208.1	179	201.7
96	194.3	193	212.3	183.8	207.8
97	200.8	203.1	217.3	191.3	215.2
98	211.3	221.1	223.8	207.6	225.1
99	290.4	299.3	234.2	282.2	241
100	350	426	527	402	552
Weighting	Surface Area
Filename	Capture 2019-07-24 14-17-58	Capture 2019-07-24 14-18-33	Capture 2019-07-24 14-19-08	Capture 2019-07-24 14-19-43	Capture 2019-07-24 14-20-18	Average	Standard Error
Mean	147.9	154	157.8	148.3	149.9	151.6	1.9
Mode	106.8	147.7	107.5	98	107.3	113.5	8.7
SD	56.7	62.4	65.5	55.4	50.2	58.1	2.7
D10	92.3	90.5	93.1	93.2	93.3	92.5	0.5
D50	133.1	143.7	145.1	141.2	141.1	140.8	2.1
D90	210.4	234.9	219.8	203.9	216.8	217.2	5.2
Valid Tracks	1524	1889	1761	1869	2283
Graph Data
Bin centre (nm)	Surface area conc. (nm² / ml)	Surface area conc. (nm² / ml)	Surface area conc. (nm² / ml)	Surface area conc. (nm² / ml)	Surface area conc. (nm² / ml)	Surface area average	Standard Error
0.5	0	0	0	0	0	0	0
1.5	0	0	0	0	0	0	0
2.5	0	0	0	0	0	0	0
3.5	0	0	0	0	0	0	0
4.5	0	0	0	0	0	0	0
5.5	0	0	0	0	0	0	0
6.5	0	0	0	0	0	0	0
7.5	0	0	0	0	0	0	0
8.5	0	0	0	0	0	0	0
9.5	0	0	0	0	0	0	0
10.5	0	0	0	4	0	0	0
11.5	0	0	0	111	0	22	22
12.5	0	0	0	1701	0	340	340
13.5	0	0	0	16142	0	3228	3228
14.5	0	0	0	103622	0	20724	20724
15.5	0	0	0	481790	0	96358	96358
16.5	0	0	0	1712917	0	342583	342583
17.5	0	0	0	4865279	0	973056	973056
18.5	0	0	1	11442358	0	2288472	2288472
19.5	0	0	24	22952351	0	4590475	4590469
20.5	0	0	390	40257155	0	8051509	8051411
21.5	3	0	4743	63059807	0	12612911	12611724
22.5	204	0	42937	89840496	0	17976727	17965944
23.5	6936	0	293573	118274189	0	23714939	23639880
24.5	130353	0	1540446	145895110	0	29513182	29096936
25.5	1435418	0	6317267	170697192	0	35689975	33771754
26.5	9775618	0	20657350	191469599	0	44380513	36969410
27.5	43334133	0	55024038	207837417	0	61239118	38308443
28.5	131277927	0	122036890	220097242	0	94682412	42276410
29.5	284765731	0	230337968	228970747	0	148814889	61581388
30.5	462572433	0	377841836	235371765	0	215157207	95045899
31.5	587453367	0	549393935	240235198	1	275416500	127549375
32.5	607856938	0	720954202	244416988	5	314645627	150664417
33.5	533031089	0	867723967	248652818	19	329881579	166551189
34.5	411107381	1	971593143	253556475	71	327251414	179140442
35.5	288687754	11	1024814610	259640579	252	314628641	187888654
36.5	190509600	84	1029603374	267347383	834	297492255	190439417
37.5	121544073	477	995174619	277082326	2592	278760818	186196420
38.5	76847348	2088	934059421	289246830	7579	260032653	176628330
39.5	49170400	7341	858982422	304269284	20921	242490073	164140359
40.5	32388195	21387	780859500	322634534	54656	227191654	151129640
41.5	22257382	53170	707935964	344912883	135496	215058979	139531684
42.5	16115138	115855	645805325	371789906	319608	206829166	130702055
43.5	12375544	226638	597969796	404098489	719198	203077933	125461937
44.5	10120121	406709	566649364	442854577	1547955	204315745	124215949
45.5	8827823	682447	553650763	489298137	3195010	211130836	127112015
46.5	8214238	1088865	561223058	544940999	6340140	224361460	134229383
47.5	8142577	1676169	592925166	611623360	12126109	245298676	145774198
48.5	8579670	2520626	654603155	691581078	22407335	275938373	162274737
49.5	9581891	3741965	755623518	787526289	40097108	319314154	184806724
50.5	11305125	5531596	910535120	902744515	69638147	379950901	215315618
51.5	14040537	8199397	1141328831	1041212320	117622675	464480752	257113031
52.5	18285765	12252764	1480403141	1207740690	193587531	582453978	315589011
53.5	24871621	18531808	1974180330	1408150779	311005566	747348021	399081305
54.5	35180044	28442266	2687000425	1649490416	488484992	977719629	519700671
55.5	51513539	44357920	3704433149	1940301722	751171363	1298355539	693824181
56.5	77713718	70314946	5134572276	2290952411	1132321033	1741174877	941992043
57.5	120180627	113202916	7105447855	2714045497	1674979615	2345571302	1287977553
58.5	189515966	184784358	9756785235	3224924262	2433655798	3157933124	1756773017
59.5	303093381	305057997	13225317146	3842291020	3475833954	4230318700	2371292686
60.5	488920353	507715826	17624779176	4588959289	4883125630	5618700055	3147889541
61.5	791141137	848686246	23024102120	5492758848	6751830162	7381703703	4091242560
62.5	1277344821	1418878913	29429150041	6587611365	9192669314	9581130891	5189562343
63.5	2047372334	2361999941	36773562593	7914789839	12329489637	12285442869	6411183056
64.5	3242479638	3897300460	44922361807	9524367009	16296794278	15576660638	7703435931
65.5	5052564609	6344928572	53688511808	11476844655	21236070758	19559784080	8994458644
66.5	7718004314	10147996533	62858938711	13844935932	27291011498	24372177398	10198681297
67.5	11522070517	15881114603	72224098819	16715444720	34601860141	30188917760	11227487252
68.5	16770630951	24231758961	81604838409	20191148193	43299235073	37219522317	12007963758
69.5	23758398464	35941372642	90871849037	24392540669	53497859174	45692403997	12513941772
70.5	32725129331	51700488406	99955592295	29459238713	65290645841	55826218917	12811862880
71.5	43809678180	72007090711	108847083962	35550782143	78743551532	67791637305	13110818582
72.5	57012783290	97016126414	117591644561	42846498149	93891513264	81671713136	13766764594
73.5	72179165513	126422288726	126278402340	51544035160	110735665008	97431911349	15154125243
74.5	89005470437	159418776638	135028149160	61856131909	129241894994	114910084628	17431196042
75.5	107073952290	194757418872	143981465716	74005182016	149340690685	133831741916	20433647585
76.5	125905009023	230905131193	153288209549	88215204028	170928137270	153848338213	23788989652
77.5	145017210878	266260662043	163098742907	104700950493	193867896744	174589092613	27079720886
78.5	163982689358	299377544116	173556781541	123654102190	217993995079	195713022457	29944094436
79.5	182468439123	329141118121	184793483677	145226801261	243114273728	216948823182	32123708548
80.5	200258763540	354866565116	196922330717	169513170585	269014402880	238115046567	33482713970
81.5	217258922130	376311110747	210034419972	196529917137	295462391695	259119352336	34010136982
82.5	233483603402	393616062178	224193940704	226197572005	322213552388	279940946135	33810774036
83.5	249035559150	407206497046	239433793898	258324305562	349015873451	300603205821	33088119191
84.5	264079758370	417677501265	255751509581	292594485664	375615731976	321143797371	32119672084
85.5	278817339322	425689290771	273105785092	328564133094	401763831232	341588075902	31219984372
86.5	293462121555	431884070700	291414089304	365665105524	427221197087	361929316834	30684529877
87.5	308220998039	436828825940	310551830100	403219184439	451765017216	382117171147	30717849075
88.5	323278442251	440982287635	330353549760	440462282989	475194071729	402054126873	31374050532
89.5	338784715531	444681341875	350616489183	476577837302	497333491627	421598775104	32548350829
90.5	354847096682	448141466515	371106654577	510737248135	518038597285	440574212639	34026258833
91.5	371523472160	451466448878	391567252687	542144197036	537197612842	458779796721	35555347300
92.5	388817807341	454663824263	411729070576	570078961051	554733119506	476004556547	36902895819
93.5	406677270749	457663633443	431322110047	593938637159	570602193219	492040768923	37888350940
94.5	424991031872	460338951497	450087591707	613269525394	584795259845	506696472063	38397005322
95.5	443590949703	462527120614	467789356149	627788771628	597333783654	519805996350	38383701854
96.5	462254481706	464050784972	484223727980	637393605149	608266973639	531237914689	37871932032
97.5	480710153883	464737799594	499227067705	642157921766	617667740774	540900136744	36950361552
98.5	498645836992	464439006719	512680490370	642317334243	625628164700	548742166605	35766519401
99.5	515719879858	463042862873	524511536025	638244934073	632254730749	554754788715	34515432180
100.5	531574879811	460486033516	534692887471	630420738639	637663580484	558967623984	33419193655
101.5	545853557623	456759369471	543238500822	619398074909	641975985896	561445097744	32693615208
102.5	558215895297	451909104791	550197712089	605769997996	645314214499	562281384934	32504071923
103.5	568356440054	446033593809	555647992136	590138349821	647797905587	561594856282	32925056056
104.5	576020524051	439276344735	559687043568	573087357782	649541031523	559522460332	33925426388
105.5	581018132075	431816427816	562424880017	555162891780	650649476000	556214361538	35389080180
106.5	583234284394	423857488474	563976422624	536857758266	651219226093	551829035970	37157176055
107.5	582635080374	415616570270	564455014327	518602796559	651335147709	546528921848	39068693812
108.5	579268937761	407313776585	563967111890	500763100310	651070294931	540476644295	40986043096
109.5	573263010631	399163525011	562608285308	483638424548	650485691865	533831787473	42805347910
110.5	564815214433	391367834808	560460544849	467466737664	649630519943	526748170339	44456618964
111.5	554182668912	384111789117	557590932241	452429903525	648542642579	519371587275	45898852537
112.5	541667641256	377561068193	554051254159	438660590996	647249401416	511837991204	47113289824
113.5	527602204653	371861277139	549878799861	426249667983	645768622666	504272114460	48096598991
114.5	512332817138	367138693575	545097865903	415253512939	644109777432	496786533398	48854890142
115.5	496205889501	363502027549	539721904111	405700845563	642275245402	489481182425	49399023163
116.5	479555182409	361044801097	533756110248	397598826032	640261636732	482443311304	49741408015
117.5	462691593615	359848000149	527200276958	390938291767	638061131766	475747858851	49894316245
118.5	445895607803	359982710764	520051743695	385698091125	635662802700	469458191217	49869585398
119.5	429412419632	361512512743	512308287970	381848536956	633053885241	463627128508	49679502955
120.5	413449529376	364495458300	503970816421	379354043820	630220972082	458298164000	49338608033
121.5	398176462725	368985507805	495045731495	378175035834	627151103720	453506768316	48866142059
122.5	383726183311	375033327572	485546870617	378269222353	623832735950	449281667961	48288893811
123.5	370197741227	382686377673	475496939615	379592340239	620256567468	445645993245	47644185705
124.5	357659721230	391988233666	464928390660	382098457588	616416215387	442618203706	46982693935
125.5	346154106059	402977098531	453883725941	385739927125	612308731147	440212717761	46370644260
126.5	335700239772	415683474303	442415240069	390467069666	607934954154	438440195593	45890664549
127.5	326298651544	430126980950	430584244765	396227660272	603299705369	437307448580	45640273841
128.5	317934573337	446312337140	418459846526	402966282575	598411827810	436816973478	45726872474
129.5	310581049670	464224557054	406117369557	410623610396	593284085274	436966134390	46258560222
130.5	304201591426	483823471946	393636530887	419135670324	587932934380	437746039792	47331462780
131.5	298752367432	505037755516	381099481165	428433134047	582378188057	439140185243	49016180432
132.5	294183958037	527758717158	368588823190	438440684740	576642590787	441122954782	51347244643
133.5	290442715488	551834222297	356185711318	449076497452	570751327108	443658094733	54318732347
134.5	287471788415	577063196668	343968119928	460251868820	564731485191	446697291804	57886574524
135.5	285211873890	603191259726	332009349756	471871026504	558611496667	450179001309	61975447118
136.5	283601761946	629908096444	320376819335	483831143178	552420572505	454027678682	66487169703
137.5	282578735416	656847199254	309131166744	496022573794	546188152679	458153565577	71308311827
138.5	282078883395	683588575302	298325666329	508329328059	539943384861	462453167589	76316100361
139.5	282037380253	709664904176	288005947228	520629782831	533714644564	466810531810	81382773136
140.5	282388774374	734571439713	278209986367	532797631456	527529106202	471099387622	86378968891
141.5	283067321948	757779678788	268968338535	544703059316	521412371654	475186154048	91176750496
142.5	284007391464	778754485347	260304560073	556214127116	515388160144	478933744829	95652669066
143.5	285143954336	796973988441	252235780448	567198336032	509478060820	482206024016	99691047932
144.5	286413166513	811951210437	244773376751	577524342080	503701347211	484872688598	103187467306
145.5	287753035556	823256074965	237923709383	587063781034	498074851050	486814290398	106052284157
146.5	289104157808	830536243444	231688882070	595693160355	492612891521	487927067040	108213929845
147.5	290410501568	833535175546	226067495133	603295770843	487327255024	488127239623	109621688307
148.5	291620205125	832105926973	221055367137	609763568472	482227219893	487354457520	110247666143
149.5	292686353638	826219488075	216646206047	614998976013	477319620141	485574128783	110087717350
150.5	293567696508	815966903477	212832216557	618916554836	472608942250	482778462725	109161171255
151.5	294229267390	801554946621	209604635091	621444499580	468097449092	478986159555	107509320520
152.5	294642872242	783295688114	206954187980	622525912311	463785325360	474240797201	105192743089
153.5	294787416714	761590821595	204871471481	622119818106	459670839237	468608073427	102287642592
154.5	294649052127	736912030558	203347254647	620201890757	455750515467	462172148711	98881482872
155.5	294221128821	709778946603	202372707732	616764865166	452019315443	455031392753	95068253640
156.5	293503955795	680736340745	201939559801	611818621836	448470820419	447293859719	90943730287
157.5	292504375672	650332107773	202040189815	605389938333	445097414360	439072805190	86601080508
158.5	291235173175	619097376305	202667655597	597521912440	441890463442	430482516192	82127127023
159.5	289714342942	587529747575	203815665084	588273071477	438840489546	421634663325	77599505614
160.5	287964248001	556080285668	205478493987	577716191662	435937335534	412635310971	73084869518
161.5	286010703502	525144501151	207650853792	565936859949	433170320404	403582647760	68638194452
162.5	283882021088	495057230640	210327713740	553031818252	430528382760	394565433296	64303143498
163.5	281608047946	466091045605	213504080253	539107135922	428000211370	385662104219	60113367701
164.5	279219231331	438457639035	217174737266	524276260597	425574361880	376940446022	56094555243
165.5	276745734717	412311539423	221333950977	508657999950	423239359033	368457716820	52267004701
166.5	274216626221	387755478649	225975142863	492374487197	420983784090	360261103804	48648485099
167.5	271659154093	364846777794	231090535268	475549181743	418796347407	352388399261	45257147474
168.5	269098118313	343604194237	236670774527	458304952884	416665946424	344868797277	42114248873
169.5	266555342188	324014776172	242704537449	440762289530	414581709636	337723730995	39246411031
170.5	264049243433	306040381440	249178127966	423037672534	412533027354	330967690546	36687032861
171.5	261594500924	289623624130	256075071859	405242138901	410509570370	324608981237	34476306360
172.5	259201811009	274693106870	263375718652	387480059216	408501297824	318650398714	32659129335
173.5	256877726150	261167874727	271056860921	369848141493	406498455835	313089811825	31280295596
174.5	254624568385	248961086754	279091382400	352434666643	404491568581	307920654553	30377021807
175.5	252440410822	237982944230	287447947179	335318953306	402471423680	303132335843	29970274651
176.5	250319121561	228142942689	296090743026	318571043060	400429053767	298710580821	30057839352
177.5	248250466186	219351530514	304979292237	302251591346	398355716233	294637719303	30612194906
178.5	246220266841	211521263293	314068343345	286411944872	396242873034	290892938277	31584250678
179.5	244210617791	204567542769	323307856487	271094382911	394082172440	287452514480	32911136520
180.5	242200159029	198409024575	332643094073	256332497778	391865434444	284290041980	34524784131
181.5	240164410744	192967771702	342014826621	242151688762	389584641392	281376667844	36358722389
182.5	238076172131	188169222301	351359661247	228569743859	387231935185	278681346945	38352161132
183.5	235905987963	183942031791	360610497207	215597484561	384799622134	276171124731	40451706255
184.5	233622685464	180217840972	369697109286	203239450631	382280186295	273811454530	42611520714
185.5	231193982288	176931014158	378546855713	191494604001	379666311756	271566553583	44792683390
186.5	228587163718	174018384326	387085502796	180357033476	376950914078	269399799679	46962254412
187.5	225769823764	171419035822	395238153857	169816644742	374127180707	267274167778	49092328217
188.5	222710660661	169074149136	402930265420	159859822969	371188619867	265152703610	51159201728
189.5	219380312632	166926926417	410088729268	150470058122	368129117111	262999028710	53142697499
190.5	215752214940	164922610553	416642995123	141628525676	364942998403	260777868939	55025638495
191.5	211803454566	163008604707	422526205627	133314617827	361625098311	258455596208	56793452975
192.5	207515594715	161134693026	427676313094	125506422421	358170831662	256000770984	58433882778
193.5	202875438210	159253356948	432037146512	118181148600	354576266799	253384671414	59936768940
194.5	197875697028	157320175182	435559397436	111315499696	350838198433	250581793555	61293891757
195.5	192515535237	155294289359	438201494967	104885995076	346954217980	247570306524	62498846302
196.5	186800954524	153138911774	439930342768	98869243578	342922779267	244332446382	63546938356
197.5	180744995662	150821847074	440721895121	93242171811	338743257485	240854833431	64435089436
198.5	174367735448	148315996443	440561554006	87982211047	334415999416	237128699272	65161742943
199.5	167696066750	145599811325	439444375109	83067446660	329942363076	233150012584	65726766421
200.5	160763258922	142657664160	437375076995	78476734152	325324745179	228919495882	66131347406
201.5	153608306316	139480106218	434367854338	74189785760	320566595090	224442529544	66377882438
202.5	146275083374	136063987340	430446002632	70187231498	315672414268	219728943822	66469860342
203.5	138811334988	132412419073	425641367917	66450658263	310647740566	214792704161	66411741969
204.5	131267539699	128534570880	419993640492	62962630399	305499117151	209651499724	66208839163
205.5	123695690196	124445298286	413549516118	59706694781	300234046189	204326249114	65867195867
206.5	116148039981	120164611331	406361751592	56667373217	294860927874	198840540799	65393473991
207.5	108675866479	115717000803	398488143769	53830144634	289388985727	193220028282	64794846183
208.5	101328299369	111130647721	389990462047	51181419220	283828179477	187491801567	64078896865
209.5	94151258511	106436547851	380933364054	48708506418	278189107132	181683756793	63253532138
210.5	87186538913	101667587160	371383322842	46399578400	272482898107	175823985084	62326898412
211.5	80471071345	96857605865	361407591541	44243630382	266721099494	169940199725	61307308982
212.5	74036377156	92040487999	351073228241	42230438974	260915557669	164059218008	60203177368
213.5	67908225248	87249310431	340446200132	40350519497	255078297529	158206510567	59022956032
214.5	62106488929	82515580337	329590581843	38595083072	249221401609	152405827158	57775079102
215.5	56645191023	77868583815	318567858681	36955994118	243356891297	146678903787	56467907947
216.5	51532717851	73334861099	307436341301	35425728757	237496612231	141045252248	55109678816
217.5	46772176715	68937816411	296250694413	33997334526	231652125745	135522029562	53708452138
218.5	42361867729	64697463284	285061578528	32664391673	225834608060	130123981855	52272063551
219.5	38295839003	60630299801	273915400689	31420976275	220054758618	124863454877	50808077111
220.5	34564494418	56749302839	262854167526	30261625295	214322718688	119750461753	49323741390
221.5	31155224983	53064026405	251915432001	29181303688	208648001090	114792797633	47825949402
222.5	28053037926	49580786508	241132323761	28175373580	203039431567	109996190668	46321203314
223.5	25241161672	46302913707	230533652087	27239565534	197505102083	105364479017	44815584841
224.5	22701609382	43231054422	220144070057	26369951865	192052336016	100899804349	43314732054
225.5	20415688389	40363503004	209984288469	25562921965	186687665022	96602813370	41823823120
226.5	18364447346	37696548272	200071328488	24815159555	181416817078	92472860148	40347567153
227.5	16529056996	35224820478	190418802560	24123621789	176244715074	88508203379	38890202149
228.5	14891123947	32941627149	181037213990	23485520113	171175485159	84706194072	37455499613
229.5	13432939719	30839268893	171934266553	22898302780	166212473928	81063450375	36046775318
230.5	12137669455	28909328777	163115176543	22359638905	161358273487	77576017433	34666905399
231.5	10989486197	27142931162	154582980750	21867403973	156614753353	74239511087	33318346859
232.5	9973657526	25530967948	146338834911	21419666675	151983098165	71049245045	32003161495
233.5	9076591742	24064291812	138382298185	21014676971	147463850179	68000341778	30723042214
234.5	8285850742	22733877374	130711600155	20650855273	143056955534	65087827816	29479340749
235.5	7590136419	21530952197	123323887717	20326782658	138761813379	62306714474	28273095831
236.5	6979256826	20447100214	116215449952	20041191985	134577326946	59652065185	27105061004
237.5	6444077704	19474340564	109381919800	19792959856	130501955794	57119050744	25975731360
238.5	5976464169	18605185019	102818451887	19581099292	126533768472	54702993768	24885368652
239.5	5569216649	17832677176	96519876372	19404753068	122670494974	52399403648	23834024366
240.5	5216004378	17150416484	90480829116	19263187598	118909578411	50204003197	22821560501
241.5	4911299144	16552569931	84695858807	19155787294	115248225415	48112748118	21847667977
242.5	4650311345	16033873964	79159511989	19082049332	111683454864	46121840299	20911882726
243.5	4428929947	15589628889	73866397208	19041578723	108212144578	44227735869	20013599676
244.5	4243667497	15215687700	68811229681	19034083632	104831075707	42427148843	19152084971
245.5	4091611018	14908440934	63988858099	19059370868	101536974565	40717051097	18326486876
246.5	3970379347	14664798890	59394275329	19117341461	98326551751	39094669356	17535845922
247.5	3878087321	14482172243	55022614918	19207986264	95196538376	37557479824	16779104904
248.5	3813317037	14358451825	50869135400	19331381504	92143719318	36103201017	16055119377
249.5	3775096380	14291988154	46929194510	19487684204	89164963405	34729785330	15362669307
250.5	3762884951	14281571028	43198215468	19677127419	86257250457	33435409865	14700472492
251.5	3776567520	14326409379	39671647519	19900015190	83417695175	32218466957	14067200312
252.5	3816455149	14426111391	36344922909	20156717170	80643567822	31077554888	13461496258
253.5	3883294158	14580664742	33213412461	20447662829	77932311721	30011469182	12881997590
254.5	3978283141	14790416740	30272381791	20773335183	75281557548	29019194881	12327360357
255.5	4103098268	15056053976	27516950118	21134263962	72689134475	28099900160	11796287890
256.5	4259927114	15378581065	24942053424	21531018169	70153078181	27252931591	11287562810
257.5	4451511267	15759297937	22542413517	21964197946	67671635804	26477811294	10800082547
258.5	4681197897	16199775091	20312514289	22434425707	65243267898	25774236176	10332898369
259.5	4953000365	16701826197	18246586176	22942336465	62866647508	25142079342	9885258017
260.5	5271667781	17267477372	16338599507	23488567322	60540656472	24581393691	9456652134
261.5	5642763116	17898932475	14582267092	24073746071	58264379101	24092417571	9046864851
262.5	6072749108	18598533788	12971056068	24698478894	56037093394	23675582250	8656028990
263.5	6569080628	19368717491	11498208666	25363337126	53858259999	23331520782	8284686386
264.5	7140301440	20211963427	10156771278	26068843094	51727509118	23061077671	7933853528
265.5	7796142390	21130738780	8939630896	26815455040	49644625608	22865318543	7605091974
266.5	8547616873	22127435449	7839557743	27603551153	47609532534	22745538750	7300581410
267.5	9407108012	23204301092	6849252769	28433412776	45622273456	22703269621	7023190421
268.5	10388440372	24363364094	5961398494	29305206837	43682993735	22740280706	6776535736
269.5	11506927090	25606352948	5168711665	30218967620	41791921177	22858576100	6565014987
270.5	12779381283	26934610906	4463996153	31174577978	39949346309	23060382526	6393791847
271.5	14224078409	28349007076	3840194574	32171750131	38155602606	23348126559	6268708602
272.5	15860654106	29849845504	3290437260	33210006222	36411046961	23724398011	6196104227
273.5	17709920177	31436774164	2808087327	34288658820	34716040712	24191896240	6182530974
274.5	19793579927	33108696082	2386780810	35406791581	33070931472	24753355974	6234390603
275.5	22133823438	34863685180	2020461061	36563240308	31476036042	25411449206	6357545046
276.5	24752783956	36698909632	1703406839	37756574682	29931624617	26168659945	6556977749
277.5	27671838681	38610565704	1430253780	38985080922	28437906491	27027129116	6836572916
278.5	30910741464	40593825128	1196009155	40246745705	26995017413	27988467773	7199037706
279.5	34486581554	42642798972	996060072	41539241621	25603008730	29053538190	7645936799
280.5	38412571887	44750520808	826175445	42859914519	24261838399	30222204212	8177769548
281.5	42696682746	46908951607	682502235	44205773050	22971363916	31493054711	8794014225
282.5	47340151669	49109008342	561556583	45573480739	21731337178	32863106902	9493087464
283.5	52335917999	51340617619	460210565	46959350919	20541401249	34327499670	10272202198
284.5	57667049461	53592794960	375675307	48359344821	19401088978	35879190705	11127138567
285.5	63305247478	55853749485	305481271	49769073133	18309823366	37508674947	12051962080
286.5	69209535730	58111012867	247456474	51183801285	17266919587	39203745189	13038732164
287.5	75325250743	60351590511	199703359	52598458711	16271588507	40949318366	14077245533
288.5	81583461509	62562132007	160574998	54007652287	15322941543	42727352469	15154855881
289.5	87900945002	64729117107	128651217	55405684113	14419996709	44516878830	16256406304
290.5	94180833668	66839052727	102715145	56786573750	13561685645	46294172187	17364304382
291.5	100314027927	68878675978	81730601	58144084979	12746861470	48033076191	18458762062
292.5	106181430795	70835157825	64820656	59471757079	11974307248	49705494721	19518213198
293.5	111657013426	72696301853	51247596	60762940565	11242744915	51282049671	20519910750
294.5	116611661879	74450732671	40394452	62010837264	10550844469	52732894147	21440693255
295.5	120917690320	76088068822	31748184	63208544534	9897233277	54028657027	22257896896
296.5	124453839452	77599075531	24884554	64349103351	9280505346	55141481647	22950376018
297.5	127110517501	78975793353	19454658	65425549941	8699230418	56046109174	23499582338
298.5	128794991404	80211639606	15173058	66430970541	8151962776	56720947477	23890642624
299.5	129436204705	81301480443	11807436	67358558812	7637249658	57149060211	24113367209
300.5	128988891553	82241672382	9169643	68201675370	7153639191	57319009628	24163118236
301.5	127436676807	83030073192	7108026	68953908825	6699687784	57225490927	24041467301
302.5	124793901546	83666022939	5500915	69609137667	6273966923	56869705998	23756576662
303.5	121105989080	84150296959	4251127	70161592296	5875069333	56259439759	23323245647
304.5	116448263619	84485033255	3281363	70605916440	5501614489	55408821833	22762572865
305.5	110923243856	84673637482	2530391	70937227176	5152253469	54337778475	22101194522
306.5	104656546851	84720669146	1949889	71151172754	4825673145	53071202357	21370070766
307.5	97791642627	84631712945	1501867	71243987404	4520599733	51637888915	20602810380
308.5	90483786336	84413239332	1156554	71212542305	4235801725	50069305251	19833560096
309.5	82893513883	84072458345	890700	71054391928	3970092231	48398269417	19094552533
310.5	75180112618	83617170585	686198	70767814961	3722330754	46657623023	18413515417
311.5	67495468914	83055618954	528986	70351849094	3491424468	44878978083	17811279447
312.5	59978650838	82396344379	408175	69806318986	3276329001	43091610276	17300026365
313.5	52751512016	81648048291	315345	69131856794	3076048801	41321556249	16882604147
314.5	45915510542	80819464169	244005	68329914748	2889637114	39590954116	16553140050
315.5	39549834348	79919239920	189157	67402769339	2716195612	37917645675	16298843627
316.5	33710822423	78955832402	146960	66353516782	2554873734	36315038460	16102561126
317.5	28432579334	77937414899	114464	65186059568	2404867761	34792207205	15945484547
318.5	23728606403	76871797926	89409	63905084005	2265419679	33354199484	15809489002
319.5	19594221846	75766363369	70062	62516028810	2135815859	32002499989	15678792823
320.5	16009516146	74628011639	55096	61025044944	2015385599	30735602685	15540875548
321.5	12942587308	73463121219	43496	59438947019	1903499539	29549639716	15386758011
322.5	10352819957	72277519837	34483	57765156747	1799568009	28439019807	15210823936
323.5	8194007803	71076466292	27464	56011639052	1703039301	27397035982	15010366374
324.5	6417164631	69864641912	21982	54186831569	1613397922	26416411603	14785009215
325.5	4972919015	68646150553	17687	52299568414	1530162815	25489763697	14536110032
326.5	3813436863	67424526056	14312	50358999181	1452885599	24609972402	14266210046
327.5	2893859588	66202746109	11650	48374504251	1381148810	23770454082	13978565400
328.5	2173281174	64983251534	9543	46355607547	1314564185	22965342797	13676771754
329.5	1615313446	63767970059	7870	44311887954	1252770980	22189590062	13364480081
330.5	1188304965	62558343794	6535	42252890634	1195434333	21438996052	13045193595
331.5	865286367	61355359651	5467	40188039503	1142243694	20710186936	12722132100
332.5	623714809	60159582132	4608	38126552101	1092911306	20000552991	12398149404
333.5	445084614	58971187947	3915	36077358084	1047170751	19308161062	12075690504
334.5	314461973	57790002047	3354	34049022464	1004775572	18631653082	11756777290
335.5	219990511	56615534755	2897	32049674676	965497951	17970140158	11443013847
336.5	152403070	55447019720	2525	30086944433	929127467	17323099443	11135604730
337.5	104564318	54283452515	2221	28167905196	895469916	16690278833	10835381540
338.5	71059431	53123629722	1971	26299025954	864346203	16071612656	10542834718
339.5	47836456	51966188396	1766	24486131865	835591302	15467149957	10258148596
340.5	31904220	50809645814	1598	22734374095	809053274	14876995800	9981238496
341.5	21083564	49652439401	1460	21048209097	784592356	14301265176	9711789089
342.5	13807137	48492966744	1348	19431387318	762080109	13740048531	9449293427
343.5	8961606	47329625546	1257	17886951208	741398621	13193387648	9193092086
344.5	5765692	46160853353	1184	16417242203	722439766	12661260440	8942411858
345.5	3677588	44985166831	1127	15023916234	705104520	12143573260	8696403343
346.5	2325868	43801200311	1085	13707967133	689302322	11640159344	8454176799
347.5	1458759	42607743264	1055	12469757213	674950485	11150782155	8214835598
348.5	907457	41403776296	1036	11309054199	661973650	10675142528	7977506717
349.5	559992	40188505189	1029	10225073561	650303285	10212888611	7741367787
350.5	342864	38961392460	1033	9216525322	639877215	9763627779	7505670348
351.5	208314	37722185862	1048	8281664283	630639199	9326939741	7269759111
352.5	125616	36470943199	1074	7418342687	622538533	8902390222	7033087167
353.5	75193	35208052834	1113	6624064298	615529688	8489544625	6795227183
354.5	44687	33934249250	1165	5896038928	609571978	8087981202	6555878757
355.5	26373	32650623050	1232	5231236505	604629249	7697303282	6314872162
356.5	15458	31358624861	1317	4626439828	600669606	7317150214	6072168749
357.5	9001	30060062665	1421	4078295273	597665145	6947206701	5827858349
358.5	5207	28757092182	1548	3583360766	595591724	6587210286	5582153966
359.5	2993	27452200121	1704	3138150500	594428741	6236956812	5335384120
360.5	1710	26148180205	1892	2739175925	594158930	5896303733	5087983142
361.5	972	24848102129	2122	2382982711	594768184	5565171224	4840479736
362.5	549	23555273775	2400	2066183433	596245378	5243541107	4593484127
363.5	308	22273197212	2738	1785485885	598582213	4931453671	4347674079
364.5	172	21005519248	3151	1537716998	601773068	4629002527	4103780094
365.5	96	19755977476	3656	1319842431	605814865	4336327705	3862570076
366.5	53	18528342944	4275	1128981991	610706937	4053607240	3624833771
367.5	29	17326360733	5038	962421093	616450907	3781047560	3391367269
368.5	16	16153689842	5979	817618547	623050574	3518872992	3162957888
369.5	9	15013843852	7148	692210963	630511797	3267314754	2940369703
370.5	5	13910133864	8601	584014149	638842389	3026599802	2724330050
371.5	3	12845615166	10416	491021842	648052008	2796939887	2515517235
372.5	1	11823039006	12692	411402152	658152052	2578521181	2314549738
373.5	0	10844810705	15552	343492097	669155554	2371494782	2121977117
374.5	0	9912955160	19162	285790567	681077069	2175968392	1938272814
375.5	0	9029090554	23729	236950088	693932567	1991999388	1763829019
376.5	0	8194410824	29525	195767669	707739314	1819589466	1598953713
377.5	0	7409677185	36900	161175055	722515758	1658680980	1443869964
378.5	0	6675218685	46307	132228625	738281396	1509155003	1298717525
379.5	0	5990941507	58333	108099169	755056645	1370831131	1163556749
380.5	0	5356346458	73739	88061736	772862698	1243468926	1038374791
381.5	0	4770553857	93510	71485727	791721376	1126770894	923094086
382.5	0	4232334820	118920	57825342	811654965	1020386809	817583005
383.5	0	3740147804	151623	46610507	832686047	923919196	721668581
384.5	0	3292179162	193756	37438335	854837314	836929713	635150982
385.5	0	2886386401	248085	29965190	878131375	758946210	557819074
386.5	0	2520542861	318183	23899372	902590548	689470193	489465604
387.5	0	2192282555	408662	18994435	928236635	627984457	429899094
388.5	0	1899144025	525464	15043143	955090691	573960665	378947134
389.5	0	1638612189	676237	11872040	983172772	526866648	336442988
390.5	0	1408157299	870804	9336614	1012501671	486173278	302186388
391.5	0	1205270332	1121755	7317011	1043094643	451360748	275875441
392.5	0	1027494278	1445195	5714283	1074967113	421924174	257024657
393.5	0	872451014	1861671	4447104	1108132369	397378432	244908480
394.5	0	737863581	2397335	3448930	1142601254	377262220	238575357
395.5	0	621573893	3085374	2665556	1178381828	361141330	236942942
396.5	0	521555984	3967780	2053016	1215479037	348611164	238933168
397.5	0	435925081	5097516	1575809	1253894367	339298555	243587016
398.5	0	362942826	6541156	1205387	1293625487	332862971	250124954
399.5	0	301019077	8382092	918899	1334665894	328997192	257955507
400.5	0	248710735	10724383	698126	1377004551	327427559	266652398
401.5	0	204718080	13697376	528605	1420625529	327913918	275919970
402.5	0	167879079	17461186	398903	1465507651	330249364	285558917
403.5	0	137162136	22213171	300020	1511624136	334259893	295437482
404.5	0	111657709	28195506	224898	1558942265	339804076	305469263
405.5	0	90569169	35703976	168029	1607423052	346772845	315597007
406.5	0	73203258	45098104	125128	1657020931	355089484	325781232
407.5	0	58960431	56812689	92876	1707683472	364709894	335992584
408.5	0	47325323	71370828	68713	1759351119	375623197	346207013
409.5	0	37857523	89398448	50673	1811956953	387852719	356403186
410.5	0	30182827	111640320	37250	1865426503	401457380	366561759
411.5	0	23985045	138977477	27296	1919677580	416533479	376666386
412.5	0	18998447	172445853	19938	1974620169	433216881	386706542
413.5	0	15000885	213255894	14519	2030156360	451685531	396682420
414.5	0	11807587	262812756	10539	2086180338	472162244	406612373
415.5	0	9265638	322736585	7627	2142578421	494917654	416543492
416.5	0	7249093	394882236	5503	2199229168	520273200	426566082
417.5	0	5654710	481357634	3958	2256003543	548603969	436832780
418.5	0	4398243	584539837	2839	2312765151	580341214	447582908
419.5	0	3411253	707087681	2030	2369370538	615974300	459172063
420.5	0	2638383	851949792	1447	2425669563	656051837	472105824
421.5	0	2035043	1022366583	1029	2481505847	701181700	487074427
422.5	0	1565465	1221864809	729	2536717287	752029658	504982555
423.5	0	1201073	1454243162	516	2591136650	809316280	526965348
424.5	0	919120	1723547461	363	2644592228	873811834	554380246
425.5	0	701572	2034034005	255	2696908572	946328881	588766461
426.5	0	534181	2390119881	179	2747907290	1027712306	631771513
427.5	0	405734	2796319215	125	2797407905	1118826596	685055748
428.5	0	307430	3257164735	87	2845228770	1220540204	750195208
429.5	0	232393	3777114429	61	2891188046	1333706986	828603951
430.5	0	175260	4360443623	42	2935104712	1459144728	921487700
431.5	0	131870	5011123409	29	2976799627	1597610987	1029827401
432.5	0	98998	5732687043	20	3016096616	1749776535	1154381867
433.5	0	74153	6528086655	14	3052823579	1916196880	1295696623
434.5	0	55421	7399543365	10	3086813621	2097282483	1454109543
435.5	0	41330	8348394604	7	3117906174	2293268423	1629748923
436.5	0	30755	9374943160	4	3145948123	2504184409	1822523677
437.5	0	22837	10478313006	3	3170794909	2729826151	2032107647
438.5	0	16921	11656317428	2	3192311605	2969729191	2257920858
439.5	0	12511	12905345240	1	3210373953	3223146341	2499110592
440.5	0	9231	14220270928	0	3224869353	3489029903	2754534800
441.5	0	6797	15594394345	0	3235697791	3766019787	3022749990
442.5	0	4994	17019415172	0	3242772694	4052438572	3302005267
443.5	0	3661	18485446590	0	3246021707	4346294392	3590243849
444.5	0	2679	19981071644	0	3245387379	4645292340	3885112988
445.5	0	1956	21493444533	0	3240827756	4946854849	4183982899
446.5	0	1425	23008437618	0	3232316861	5248151181	4483974910
447.5	0	1036	24510833331	0	3219845066	5546135886	4781998727
448.5	0	752	25984558468	0	3203419350	5837595714	5074798300
449.5	0	544	27412956620	0	3183063432	6119204119	5359005450
450.5	0	393	28779092822	0	3158817777	6387582199	5631200057
451.5	0	283	30066082958	0	3130739486	6639364545	5887975316
452.5	0	204	31257439157	0	3098902049	6871268282	6126006275
453.5	0	146	32337421376	0	3063394983	7080163301	6342119710
454.5	0	105	33291384684	0	3024323345	7263141627	6533363201
455.5	0	75	34106111503	0	2981807120	7417583740	6697071274
456.5	0	53	34770118217	0	2935980511	7541219756	6830926457
457.5	0	38	35273926120	0	2886991107	7632183453	6933013271
458.5	0	27	35610287748	0	2834998969	7689057349	7001863317
459.5	0	19	35774360964	0	2780175608	7710907318	7036489965
460.5	0	13	35763824960	0	2722702903	7697305575	7036411448
461.5	0	9	35578934276	0	2662771934	7648341244	7001661587
462.5	0	7	35222509107	0	2600581762	7564618175	6932787796
463.5	0	5	34699862382	0	2536338172	7447240112	6830836458
464.5	0	3	34018666287	0	2470252361	7297783730	6697326204
465.5	0	2	33188762970	0	2402539631	7118260521	6534210051
466.5	0	2	32221926007	0	2333418048	6911068811	6343827688
467.5	0	1	31131580759	0	2263107120	6678937576	6128849560
468.5	0	0	29932492943	0	2191826486	6424863886	5892214598
469.5	0	0	28640435535	0	2119794629	6152046033	5637063619
470.5	0	0	27271844479	0	2047227630	5863814422	5366670497
471.5	0	0	25843473652	0	1974337973	5563562325	5084373177
472.5	0	0	24372059055	0	1901333399	5254678491	4793506551
473.5	0	0	22874001404	0	1828415840	4940483449	4497338998
474.5	0	0	21365075158	0	1755780418	4624171115	4199014223
475.5	0	0	19860170674	0	1683614530	4308757041	3901499717
476.5	0	0	18373074628	0	1612097021	3997034330	3607542868
477.5	0	0	16916292215	0	1541397444	3691537932	3319635423
478.5	0	0	15500913030	0	1471675425	3394517691	3039986690
479.5	0	0	14136520892	0	1403080115	3107920201	2770505521
480.5	0	0	12831146476	0	1335749748	2833379245	2512790854
481.5	0	0	11591260253	0	1269811297	2572214310	2268130317
482.5	0	0	10421802197	0	1205380226	2325436485	2037506176
483.5	0	0	9326243860	0	1142560339	2093760840	1821607757
484.5	0	0	8306677780	0	1081443720	1877624300	1620849333
485.5	0	0	7363928884	0	1022110766	1677207930	1435392400
486.5	0	0	6497682383	0	964630302	1492462537	1265171250
487.5	0	0	5706622772	0	909059777	1323136510	1109920763
488.5	0	0	4988578826	0	855445525	1168804870	969205387
489.5	0	0	4340669918	0	803823112	1028898606	842448373
490.5	0	0	3759449523	0	754217721	902733449	728960448
491.5	0	0	3241042415	0	706644608	789537405	627967195
492.5	0	0	2781272710	0	661109592	688476460	538634598
493.5	0	0	2375780620	0	617609596	598678043	460092283
494.5	0	0	2020126409	0	576133211	519251924	391454172
495.5	0	0	1709880675	0	536661287	449308393	331836338
496.5	0	0	1440700650	0	499167546	387973639	280371974
497.5	0	0	1208392652	0	463619202	334402371	236223500
498.5	0	0	1008961284	0	429977590	287787775	198591866
499.5	0	0	838646220	0	398198790	247369002	166723220
500.5	0	0	693947717	0	368234252	212436394	139913150
501.5	0	0	571642103	0	340031403	182334701	117508794
502.5	0	0	468788585	0	313534241	156464565	98909215
503.5	0	0	382728765	0	288683908	134282535	83564559
504.5	0	0	311080191	0	265419247	115299888	70974623
505.5	0	0	251725222	0	243677321	99080508	60687514
506.5	0	0	202796379	0	223393909	85238058	52298938
507.5	0	0	162659241	0	204503976	73432643	45452249
508.5	0	0	129893787	0	186942104	63367178	39838894
509.5	0	0	103274983	0	170642890	54783575	35198379
510.5	0	0	81753254	0	155541313	47458913	31316890
511.5	0	0	64435349	0	141573065	41201683	28024055
512.5	0	0	50566001	0	128674851	35848171	25187974
513.5	0	0	39510672	0	116784648	31259064	22709141
514.5	0	0	30739564	0	105841938	27316300	20514063
515.5	0	0	23813025	0	95787908	23920186	18549268
516.5	0	0	18368391	0	86565616	20986801	16776136
517.5	0	0	14108261	0	78120134	18445679	15166712
518.5	0	0	10790157	0	70398653	16237762	13700499
519.5	0	0	8217508	0	63350575	14313617	12362089
520.5	0	0	6231846	0	56927573	12631884	11139484
521.5	0	0	4706127	0	51083629	11157951	10022937
522.5	0	0	3539052	0	45775053	9862821	9004177
523.5	0	0	2650287	0	40960488	8722155	8075908
524.5	0	0	1976458	0	36600893	7715470	7231491
525.5	0	0	1467835	0	32659509	6825469	6464762
526.5	0	0	1085595	0	29101825	6037484	5769916
527.5	0	0	799587	0	25895515	5339020	5141456
528.5	0	0	586512	0	23010382	4719379	4574161
529.5	0	0	428457	0	20418286	4169349	4063082
530.5	0	0	311719	0	18093064	3680957	3603533
531.5	0	0	225866	0	16010452	3247264	3191097
532.5	0	0	162996	0	14147996	2862198	2821626
533.5	0	0	117151	0	12484968	2520424	2491239
534.5	0	0	83862	0	11002270	2217226	2196321
535.5	0	0	59791	0	9682353	1948429	1933516
536.5	0	0	42460	0	8509117	1710315	1699720
537.5	0	0	30032	0	7467830	1499572	1492076
538.5	0	0	21157	0	6545035	1313238	1307956
539.5	0	0	14846	0	5728468	1148663	1144955
540.5	0	0	10377	0	5006974	1003470	1000878
541.5	0	0	7224	0	4370426	875530	873725
542.5	0	0	5010	0	3809652	762932	761680
543.5	0	0	3461	0	3316356	663963	663098
544.5	0	0	2381	0	2883054	577087	576492
545.5	0	0	1632	0	2503004	500927	500519
546.5	0	0	1115	0	2170145	434252	433973
547.5	0	0	758	0	1879040	375960	375770
548.5	0	0	514	0	1624817	325066	324938
549.5	0	0	347	0	1403123	280694	280607
550.5	0	0	233	0	1210072	242061	242003
551.5	0	0	156	0	1042203	208472	208433
552.5	0	0	104	0	896438	179308	179282
553.5	0	0	69	0	770046	154023	154006
554.5	0	0	46	0	660607	132131	132119
555.5	0	0	30	0	565979	113202	113194
556.5	0	0	20	0	484274	96859	96854
557.5	0	0	13	0	413824	82767	82764
558.5	0	0	9	0	353163	70634	70632
559.5	0	0	6	0	301005	60202	60201
560.5	0	0	4	0	256218	51244	51243
561.5	0	0	2	0	217814	43563	43563
562.5	0	0	1	0	184928	36986	36986
563.5	0	0	0	0	156806	31361	31361
564.5	0	0	0	0	132791	26558	26558
565.5	0	0	0	0	112310	22462	22462
566.5	0	0	0	0	94867	18974	18973
567.5	0	0	0	0	80032	16006	16006
568.5	0	0	0	0	67431	13486	13486
569.5	0	0	0	0	56743	11349	11349
570.5	0	0	0	0	47689	9538	9538
571.5	0	0	0	0	40029	8006	8006
572.5	0	0	0	0	33557	6711	6711
573.5	0	0	0	0	28097	5619	5619
574.5	0	0	0	0	23496	4699	4699
575.5	0	0	0	0	19624	3925	3925
576.5	0	0	0	0	16369	3274	3274
577.5	0	0	0	0	13638	2728	2728
578.5	0	0	0	0	11348	2270	2270
579.5	0	0	0	0	9432	1886	1886
580.5	0	0	0	0	7829	1566	1566
581.5	0	0	0	0	6491	1298	1298
582.5	0	0	0	0	5375	1075	1075
583.5	0	0	0	0	4445	889	889
584.5	0	0	0	0	3672	734	734
585.5	0	0	0	0	3029	606	606
586.5	0	0	0	0	2496	499	499
587.5	0	0	0	0	2055	411	411
588.5	0	0	0	0	1689	338	338
589.5	0	0	0	0	1387	277	277
590.5	0	0	0	0	1138	228	228
591.5	0	0	0	0	932	186	186
592.5	0	0	0	0	762	152	152
593.5	0	0	0	0	623	125	125
594.5	0	0	0	0	509	102	102
595.5	0	0	0	0	415	83	83
596.5	0	0	0	0	338	68	68
597.5	0	0	0	0	275	55	55
598.5	0	0	0	0	223	45	45
599.5	0	0	0	0	181	36	36
600.5	0	0	0	0	147	29	29
601.5	0	0	0	0	119	24	24
602.5	0	0	0	0	96	19	19
603.5	0	0	0	0	78	16	16
604.5	0	0	0	0	63	13	13
605.5	0	0	0	0	50	10	10
606.5	0	0	0	0	41	8	8
607.5	0	0	0	0	33	7	7
608.5	0	0	0	0	26	5	5
609.5	0	0	0	0	21	4	4
610.5	0	0	0	0	17	3	3
611.5	0	0	0	0	14	3	3
612.5	0	0	0	0	11	2	2
613.5	0	0	0	0	9	2	2
614.5	0	0	0	0	7	1	1
615.5	0	0	0	0	5	1	1
616.5	0	0	0	0	4	0	0
617.5	0	0	0	0	3	0	0
618.5	0	0	0	0	3	0	0
619.5	0	0	0	0	2	0	0
620.5	0	0	0	0	2	0	0
621.5	0	0	0	0	1	0	0
622.5	0	0	0	0	1	0	0
623.5	0	0	0	0	0	0	0
624.5	0	0	0	0	0	0	0
625.5	0	0	0	0	0	0	0
626.5	0	0	0	0	0	0	0
627.5	0	0	0	0	0	0	0
628.5	0	0	0	0	0	0	0
629.5	0	0	0	0	0	0	0
630.5	0	0	0	0	0	0	0
631.5	0	0	0	0	0	0	0
632.5	0	0	0	0	0	0	0
633.5	0	0	0	0	0	0	0
634.5	0	0	0	0	0	0	0
635.5	0	0	0	0	0	0	0
636.5	0	0	0	0	0	0	0
637.5	0	0	0	0	0	0	0
638.5	0	0	0	0	0	0	0
639.5	0	0	0	0	0	0	0
640.5	0	0	0	0	0	0	0
641.5	0	0	0	0	0	0	0
642.5	0	0	0	0	0	0	0
643.5	0	0	0	0	0	0	0
644.5	0	0	0	0	0	0	0
645.5	0	0	0	0	0	0	0
646.5	0	0	0	0	0	0	0
647.5	0	0	0	0	0	0	0
648.5	0	0	0	0	0	0	0
649.5	0	0	0	0	0	0	0
650.5	0	0	0	0	0	0	0
651.5	0	0	0	0	0	0	0
652.5	0	0	0	0	0	0	0
653.5	0	0	0	0	0	0	0
654.5	0	0	0	0	0	0	0
655.5	0	0	0	0	0	0	0
656.5	0	0	0	0	0	0	0
657.5	0	0	0	0	0	0	0
658.5	0	0	0	0	0	0	0
659.5	0	0	0	0	0	0	0
660.5	0	0	0	0	0	0	0
661.5	0	0	0	0	0	0	0
662.5	0	0	0	0	0	0	0
663.5	0	0	0	0	0	0	0
664.5	0	0	0	0	0	0	0
665.5	0	0	0	0	0	0	0
666.5	0	0	0	0	0	0	0
667.5	0	0	0	0	0	0	0
668.5	0	0	0	0	0	0	0
669.5	0	0	0	0	0	0	0
670.5	0	0	0	0	0	0	0
671.5	0	0	0	0	0	0	0
672.5	0	0	0	0	0	0	0
673.5	0	0	0	0	0	0	0
674.5	0	0	0	0	0	0	0
675.5	0	0	0	0	0	0	0
676.5	0	0	0	0	0	0	0
677.5	0	0	0	0	0	0	0
678.5	0	0	0	0	0	0	0
679.5	0	0	0	0	0	0	0
680.5	0	0	0	0	0	0	0
681.5	0	0	0	0	0	0	0
682.5	0	0	0	0	0	0	0
683.5	0	0	0	0	0	0	0
684.5	0	0	0	0	0	0	0
685.5	0	0	0	0	0	0	0
686.5	0	0	0	0	0	0	0
687.5	0	0	0	0	0	0	0
688.5	0	0	0	0	0	0	0
689.5	0	0	0	0	0	0	0
690.5	0	0	0	0	0	0	0
691.5	0	0	0	0	0	0	0
692.5	0	0	0	0	0	0	0
693.5	0	0	0	0	0	0	0
694.5	0	0	0	0	0	0	0
695.5	0	0	0	0	0	0	0
696.5	0	0	0	0	0	0	0
697.5	0	0	0	0	0	0	0
698.5	0	0	0	0	0	0	0
699.5	0	0	0	0	0	0	0
700.5	0	0	0	0	0	0	0
701.5	0	0	0	0	0	0	0
702.5	0	0	0	0	0	0	0
703.5	0	0	0	0	0	0	0
704.5	0	0	0	0	0	0	0
705.5	0	0	0	0	0	0	0
706.5	0	0	0	0	0	0	0
707.5	0	0	0	0	0	0	0
708.5	0	0	0	0	0	0	0
709.5	0	0	0	0	0	0	0
710.5	0	0	0	0	0	0	0
711.5	0	0	0	0	0	0	0
712.5	0	0	0	0	0	0	0
713.5	0	0	0	0	0	0	0
714.5	0	0	0	0	0	0	0
715.5	0	0	0	0	0	0	0
716.5	0	0	0	0	0	0	0
717.5	0	0	0	0	0	0	0
718.5	0	0	0	0	0	0	0
719.5	0	0	0	0	0	0	0
720.5	0	0	0	0	0	0	0
721.5	0	0	0	0	0	0	0
722.5	0	0	0	0	0	0	0
723.5	0	0	0	0	0	0	0
724.5	0	0	0	0	0	0	0
725.5	0	0	0	0	0	0	0
726.5	0	0	0	0	0	0	0
727.5	0	0	0	0	0	0	0
728.5	0	0	0	0	0	0	0
729.5	0	0	0	0	0	0	0
730.5	0	0	0	0	0	0	0
731.5	0	0	0	0	0	0	0
732.5	0	0	0	0	0	0	0
733.5	0	0	0	0	0	0	0
734.5	0	0	0	0	0	0	0
735.5	0	0	0	0	0	0	0
736.5	0	0	0	0	0	0	0
737.5	0	0	0	0	0	0	0
738.5	0	0	0	0	0	0	0
739.5	0	0	0	0	0	0	0
740.5	0	0	0	0	0	0	0
741.5	0	0	0	0	0	0	0
742.5	0	0	0	0	0	0	0
743.5	0	0	0	0	0	0	0
744.5	0	0	0	0	0	0	0
745.5	0	0	0	0	0	0	0
746.5	0	0	0	0	0	0	0
747.5	0	0	0	0	0	0	0
748.5	0	0	0	0	0	0	0
749.5	0	0	0	0	0	0	0
750.5	0	0	0	0	0	0	0
751.5	0	0	0	0	0	0	0
752.5	0	0	0	0	0	0	0
753.5	0	0	0	0	0	0	0
754.5	0	0	0	0	0	0	0
755.5	0	0	0	0	0	0	0
756.5	0	0	0	0	0	0	0
757.5	0	0	0	0	0	0	0
758.5	0	0	0	0	0	0	0
759.5	0	0	0	0	0	0	0
760.5	0	0	0	0	0	0	0
761.5	0	0	0	0	0	0	0
762.5	0	0	0	0	0	0	0
763.5	0	0	0	0	0	0	0
764.5	0	0	0	0	0	0	0
765.5	0	0	0	0	0	0	0
766.5	0	0	0	0	0	0	0
767.5	0	0	0	0	0	0	0
768.5	0	0	0	0	0	0	0
769.5	0	0	0	0	0	0	0
770.5	0	0	0	0	0	0	0
771.5	0	0	0	0	0	0	0
772.5	0	0	0	0	0	0	0
773.5	0	0	0	0	0	0	0
774.5	0	0	0	0	0	0	0
775.5	0	0	0	0	0	0	0
776.5	0	0	0	0	0	0	0
777.5	0	0	0	0	0	0	0
778.5	0	0	0	0	0	0	0
779.5	0	0	0	0	0	0	0
780.5	0	0	0	0	0	0	0
781.5	0	0	0	0	0	0	0
782.5	0	0	0	0	0	0	0
783.5	0	0	0	0	0	0	0
784.5	0	0	0	0	0	0	0
785.5	0	0	0	0	0	0	0
786.5	0	0	0	0	0	0	0
787.5	0	0	0	0	0	0	0
788.5	0	0	0	0	0	0	0
789.5	0	0	0	0	0	0	0
790.5	0	0	0	0	0	0	0
791.5	0	0	0	0	0	0	0
792.5	0	0	0	0	0	0	0
793.5	0	0	0	0	0	0	0
794.5	0	0	0	0	0	0	0
795.5	0	0	0	0	0	0	0
796.5	0	0	0	0	0	0	0
797.5	0	0	0	0	0	0	0
798.5	0	0	0	0	0	0	0
799.5	0	0	0	0	0	0	0
800.5	0	0	0	0	0	0	0
801.5	0	0	0	0	0	0	0
802.5	0	0	0	0	0	0	0
803.5	0	0	0	0	0	0	0
804.5	0	0	0	0	0	0	0
805.5	0	0	0	0	0	0	0
806.5	0	0	0	0	0	0	0
807.5	0	0	0	0	0	0	0
808.5	0	0	0	0	0	0	0
809.5	0	0	0	0	0	0	0
810.5	0	0	0	0	0	0	0
811.5	0	0	0	0	0	0	0
812.5	0	0	0	0	0	0	0
813.5	0	0	0	0	0	0	0
[truncated: 4,742 more rows]

## Sheet: NTA 2
NTA Experiment Summary File
Created with NTA 3.3 Dev Build 3.3.301
[Experiment Details]
Software Version	NTA 3.3 Dev Build 3.3.301
Experiment Name	Capture 2019-07-24 13-50-33.nano
Operator Name	Mel
Time Captured	13:50:33 24/07/2019
Sample Description	24 4-6 7/24/19 1
Pre-treatment
Diluent	PBS
Remarks
Filename:	Capture 2019-07-24 13-50-41	Capture 2019-07-24 13-51-16	Capture 2019-07-24 13-51-51	Capture 2019-07-24 13-52-26	Capture 2019-07-24 13-53-01
[Conditions]
Temperature/C	25.238	25.143	25.073	25.016	24.969
Viscosity/cP	0.883894	0.885804	0.887216	0.888368	0.88932
Camera Type	sCMOS	sCMOS	sCMOS	sCMOS	sCMOS
Laser Type	Blue488	Blue488	Blue488	Blue488	Blue488
Camera Level	13	13	13	13	13
Slider Shutter	1232	1232	1232	1232	1232
Slider Gain	219	219	219	219	219
Shutter/ms	30.8	30.8	30.8	30.8	30.8
Camera Histogram Upper Limit	8235	8235	8235	8235	8235
Camera Histogram Lower Limit	0	0	0	0	0
Frame rate/fps	24.9825	24.9825	24.9825	24.9825	24.9825
Syringe Pump Speed/AU	80	80	80	80	80
[Settings]
Detection Threshold	3	3	3	3	3
Max Jump Mode	Auto	Auto	Auto	Auto	Auto
Max Jump Distance	14.4197	14.623	14.5725	14.5113	14.1184
Blur	Auto	Auto	Auto	Auto	Auto
Min Track Length	Auto	Auto	Auto	Auto	Auto
First frame	0	0	0	0	0
Total frames analysed	749	749	749	749	749
[Exclusion Regions]
No Exclusion Regions Used
[Results]						Average	Standard Error
Dilution factor (concentrations adjusted for this factor)	Not recorded	Not recorded	Not recorded	Not recorded	Not recorded
Concentration (Particles / ml)	1460000000	1650000000	1570000000	1550000000	1430000000	1530000000	40200000
Particles per frame	74	83.8	79.6	78.6	72.4	77.7	2
Centres per frame	75.1	81.1	77.5	77.4	74.7	77.1	1.1
Completed tracks	5467	5724	5480	5479	5301
X-Drift (pix/frame)	-9.3	-9.3	-9.3	-9.4	-9.4
Y-Drift (pix/frame)	0.4	0.3	0.3	0.3	0.4
[Information]
Completed Tracks	OK	OK	OK	OK	OK
Concentration	OK	OK	OK	OK	OK
Video length	OK	OK	OK	OK	OK
Noise level	No	No	No	No	No
Vibration detected	No	No	Moderate vibration	No	No
Vibration correction applied	No	No	Yes	No	No
Settings changed?	No	No	No	No	No
Errors (1)
Errors (2)
[Data Included]
Size distribution - Number weighting - With Percentiles
Size distribution - Surface area weighting - With Percentiles
Size distribution - Volume weighting - With Percentiles
Diffusion distribution - Number weighting - With Percentiles
Diffusion distribution - Surface area weighting - With Percentiles
Diffusion distribution - Volume weighting - With Percentiles
[Size Data]
Analysis Method	FTLA
Weighting	Number
Filename	Capture 2019-07-24 13-50-41	Capture 2019-07-24 13-51-16	Capture 2019-07-24 13-51-51	Capture 2019-07-24 13-52-26	Capture 2019-07-24 13-53-01	Average	Standard Error
Mean	123.9	121.7	125.6	125.1	124.7	124.2	0.7
Mode	91.7	95.7	93.1	89.1	105.7	95	2.9
SD	40	42.7	39.8	39.5	42.5	40.9	0.7
D10	81.4	81.5	83.8	82.1	82.8	82.3	0.4
D50	116.5	109.3	116.8	118.7	110.9	114.4	1.8
D90	176.9	180.7	172.8	178.8	169.3	175.7	2.1
Valid Tracks	2251	2542	2400	2422	2252
Graph Data
Bin centre (nm)	Concentration (particles / ml)	Concentration (particles / ml)	Concentration (particles / ml)	Concentration (particles / ml)	Concentration (particles / ml)	Concentration average	Standard Error
0.5	0	0	0	0	0	0	0
1.5	0	0	0	0	0	0	0
2.5	0	0	0	0	0	0	0
3.5	0	0	0	0	0	0	0
4.5	0	0	0	0	0	0	0
5.5	0	0	0	0	0	0	0
6.5	0	0	0	0	0	0	0
7.5	0	0	0	0	0	0	0
8.5	0	0	0	0	0	0	0
9.5	0	0	0	0	0	0	0
10.5	0	0	0	0	0	0	0
11.5	0	0	0	0	0	0	0
12.5	0	0	0	0	0	0	0
13.5	0	0	0	0	0	0	0
14.5	0	0	0	0	0	0	0
15.5	0	0	0	0	0	0	0
16.5	0	0	0	0	0	0	0
17.5	0	0	0	0	0	0	0
18.5	0	0	0	0	0	0	0
19.5	0	0	0	0	0	0	0
20.5	0	0	0	0	0	0	0
21.5	0	0	0	0	0	0	0
22.5	0	0	0	0	0	0	0
23.5	0	0	0	0	0	0	0
24.5	0	0	0	0	0	0	0
25.5	0	0	0	4	0	0	0
26.5	0	0	0	17	0	3	3
27.5	0	0	0	58	0	12	12
28.5	0	0	0	171	0	34	34
29.5	0	0	0	431	0	86	86
30.5	0	2	0	940	0	188	188
31.5	0	5	0	1802	0	362	360
32.5	0	14	0	3080	0	619	615
33.5	0	32	0	4753	0	957	949
34.5	0	73	0	6709	0	1356	1338
35.5	0	159	0	8771	0	1786	1747
36.5	0	330	0	10749	0	2216	2134
37.5	0	657	0	12493	0	2630	2469
38.5	0	1252	0	13923	0	3035	2733
39.5	0	2293	0	15037	0	3466	2927
40.5	0	4044	0	15896	0	3988	3078
41.5	0	6874	0	16600	0	4695	3260
42.5	0	11283	0	17268	0	5710	3623
43.5	0	17913	0	18029	0	7188	4402
44.5	0	27556	2	19010	0	9314	5861
45.5	0	41147	5	20352	0	12301	8218
46.5	0	59749	12	22211	0	16394	11661
47.5	0	84528	25	24779	0	21867	16383
48.5	1	116719	54	28305	0	29016	22600
49.5	5	157597	113	33121	0	38167	30537
50.5	22	208453	229	39680	0	49677	40428
51.5	82	270578	454	48603	0	63944	52503
52.5	275	345270	880	60739	0	81433	66987
53.5	832	433845	1666	77239	0	102716	84094
54.5	2283	537675	3086	99652	0	128539	104026
55.5	5723	658229	5599	130038	0	159918	126959
56.5	13215	797125	9947	171084	0	198274	153034
57.5	28311	956177	17306	226247	0	245609	182338
58.5	56655	1137439	29486	299872	5	304691	214894
59.5	106541	1343239	49195	397300	22	379259	250671
60.5	189297	1576188	80360	524924	100	474174	289655
61.5	319276	1839183	128491	690177	400	595506	331983
62.5	513310	2135374	201051	901409	1442	750517	378146
63.5	789477	2468115	307755	1167646	4709	947541	429176
64.5	1165226	2840895	460726	1498197	13965	1195802	486610
65.5	1655021	3257241	674361	1902116	37753	1505298	551966
66.5	2267889	3720606	964829	2387547	93323	1886839	625516
67.5	3005360	4234249	1349097	2960968	211614	2352258	704544
68.5	3860292	4801088	1843495	3626432	441563	2914574	781763
69.5	4816961	5423566	2461904	4384865	850595	3587578	844870
70.5	5852456	6103501	3213791	5233519	1517652	4384184	878068
71.5	6939186	6841944	4102396	6165653	2516813	5313198	865835
72.5	8047962	7639040	5123405	7170511	3893760	6374935	798514
73.5	9151079	8493902	6264413	8233608	5642316	7557063	678729
74.5	10224819	9404493	7505351	9337323	7690963	8832590	528441
75.5	11251040	10367526	8819857	10461735	9907021	10161436	399027
76.5	12217730	11378385	10177389	11585626	12119430	11495712	365387
77.5	13118640	12431069	11545770	12687556	14153189	12787245	427416
78.5	13952248	13518179	12893732	13746909	15863865	13994987	499809
79.5	14720368	14630939	14193133	14744816	17161523	15090156	527356
80.5	15426673	15759272	15420551	15664917	18018727	16058028	494627
81.5	16075360	16891937	16558172	16493897	18463683	16896610	412729
82.5	16670079	18016726	17593947	17221802	18563998	17613310	324799
83.5	17213195	19120723	18521180	17842151	18407667	18220983	323547
84.5	17705396	20190624	19337694	18351848	18086474	18734407	453297
85.5	18145612	21213104	20044789	18750965	17684426	19167779	646970
86.5	18531210	22175213	20646157	19042404	17271590	19533315	853775
87.5	18858399	23064782	21146880	19231489	16902271	19840764	1050505
88.5	19122787	23870817	21552614	19325524	16615988	20097546	1225198
89.5	19320012	24583854	21868975	19333337	16439813	20309198	1371286
90.5	19446381	25196253	22101153	19264837	16391019	20479929	1485529
91.5	19499445	25702417	22253725	19130600	16479405	20613118	1567135
92.5	19478458	26098918	22330633	18941488	16708985	20711696	1617395
93.5	19384668	26384529	22335295	18708322	17078956	20778354	1639607
94.5	19221424	26560168	22270787	18441607	17584021	20815602	1639176
95.5	18994100	26628750	22140081	18151303	18214169	20825681	1623734
96.5	18709844	26594979	21946273	17846655	18954130	20810376	1603019
97.5	18377215	26465082	21692799	17536069	19782702	20770773	1588144
98.5	18005725	26246509	21383594	17227031	20672229	20707017	1589846
99.5	17605359	25947627	21023195	16926076	21588482	20618148	1615816
100.5	17186115	25577407	20616773	16638772	22491204	20502054	1668075
101.5	16757593	25145137	20170099	16369747	23335489	20355613	1741931
102.5	16328661	24660158	19689451	16122725	24074076	20175014	1827162
103.5	15907218	24131635	19181479	15900579	24660439	19956270	1910584
104.5	15500034	23568376	18653032	15705390	25052408	19695848	1978703
105.5	15112688	22978678	18110978	15538509	25215862	19391343	2019710
106.5	14749558	22370224	17562027	15400618	25127988	19042083	2024739
107.5	14413877	21750009	17012566	15291787	24779567	18649561	1988532
108.5	14107808	21124302	16468520	15211525	24175923	18217616	1909669
109.5	13832560	20498627	15935246	15158833	23336348	17752323	1790475
110.5	13588495	19877775	15417463	15132237	22292111	17261616	1636721
111.5	13375249	19265828	14919213	15129834	21083353	16754695	1457273
112.5	13191839	18666192	14443857	15149322	19755368	16241315	1263946
113.5	13036766	18081645	13994089	15188039	18354791	15731066	1071923
114.5	12908109	17514388	13571981	15242999	16926177	15232731	900993
115.5	12803607	16966095	13179037	15310932	15509313	14753797	776485
116.5	12720738	16437970	12816254	15388334	14137440	14300147	723788
117.5	12656785	15930800	12484188	15471516	12836398	13875938	750742
118.5	12608907	15445003	12183028	15556671	11624583	13483638	838369
119.5	12574196	14980683	11912652	15639935	10513506	13124194	958163
120.5	12549744	14537666	11672693	15717465	9508767	12797267	1088501
121.5	12532700	14115554	11462584	15785519	8611212	12501514	1216647
122.5	12520327	13713755	11281609	15840534	7818117	12234868	1335773
123.5	12510052	13331521	11128933	15879204	7124300	11994802	1442435
124.5	12499521	12967983	11003634	15898560	6523064	11778552	1535084
125.5	12486631	12622179	10904723	15896030	6006962	11583305	1613241
126.5	12469572	12293080	10831157	15869500	5568388	11406339	1677037
127.5	12446837	11979614	10781847	15817352	5199985	11245127	1726951
128.5	12417243	11680688	10755662	15738491	4894933	11097403	1763651
129.5	12379920	11395208	10751423	15632353	4647115	10961204	1787911
130.5	12334302	11122094	10767900	15498898	4451204	10834880	1800550
131.5	12280100	10860296	10803803	15338585	4302699	10717096	1802410
132.5	12217265	10608809	10857766	15152329	4197914	10606817	1794328
133.5	12145953	10366679	10928340	14941457	4133944	10503275	1777126
134.5	12066472	10133016	11013976	14707641	4108623	10405946	1751605
135.5	11979235	9907002	11113010	14452835	4120464	10314509	1718530
136.5	11884716	9687890	11223658	14179205	4168607	10228815	1678631
137.5	11783398	9475016	11343997	13889059	4252754	10148845	1632594
138.5	11675737	9267795	11471969	13584786	4373106	10074679	1581070
139.5	11562123	9065723	11605367	13268790	4530297	10006460	1524676
140.5	11442856	8868374	11741849	12943439	4725318	9944367	1464020
141.5	11318127	8675400	11878938	12611020	4959426	9888582	1399735
142.5	11188003	8486523	12014038	12273704	5234049	9839263	1332538
143.5	11052427	8301534	12144458	11933512	5550659	9796518	1263312
144.5	10911225	8120284	12267439	11592302	5910634	9760377	1193235
145.5	10764115	7942675	12380188	11251752	6315083	9730762	1123940
146.5	10610729	7768657	12479920	10913359	6764648	9707463	1057727
147.5	10450636	7598220	12563905	10578436	7259282	9690096	997776
148.5	10283373	7431380	12629518	10248118	7797994	9678077	948280
149.5	10108476	7268181	12674297	9923371	8378581	9670581	914296
150.5	9925516	7108679	12695992	9605006	8997353	9666509	901080
151.5	9734129	6952942	12692622	9293687	9648867	9664449	912816
152.5	9534053	6801039	12662525	8989949	10325688	9662651	951229
153.5	9325154	6653036	12604402	8694212	11018221	9659005	1014913
154.5	9107454	6508994	12517354	8406794	11714612	9651042	1099777
155.5	8881151	6368962	12400911	8127924	12400785	9635947	1200133
156.5	8646628	6232973	12255047	7857757	13060619	9610605	1309691
157.5	8404462	6101045	12080184	7596380	13676302	9571675	1422147
158.5	8155422	5973176	11877185	7343829	14228872	9515697	1531461
159.5	7900456	5849347	11647336	7100093	14698942	9439235	1631976
160.5	7640675	5729517	11392308	6865122	15067593	9339043	1718511
161.5	7377328	5613624	11114123	6638835	15317389	9212260	1786468
162.5	7111777	5501589	10815095	6421124	15433446	9056606	1831975
163.5	6845458	5393314	10497780	6211858	15404487	8870579	1852040
164.5	6579850	5288683	10164906	6010889	15223769	8653620	1844698
165.5	6316439	5187565	9819317	5818050	14889804	8406235	1809133
166.5	6056682	5089813	9463902	5633161	14406772	8130066	1745748
167.5	5801976	4995270	9101541	5456032	13784574	7827879	1656171
168.5	5553631	4903766	8735044	5286458	13038483	7503477	1543189
169.5	5312848	4815126	8367102	5124229	12188412	7161543	1410617
170.5	5080697	4729163	8000242	4969122	11257835	6807412	1263113
171.5	4858111	4645690	7636798	4820908	10272467	6446795	1105967
172.5	4645874	4564515	7278876	4679354	9258811	6085486	944913
173.5	4444622	4485445	6928341	4544215	8242699	5729064	786030
174.5	4254850	4408287	6586807	4415246	7247961	5382630	635868
175.5	4076913	4332852	6255632	4292195	6295338	5050586	501990
176.5	3911039	4258953	5935922	4174807	5401691	4736483	394083
177.5	3757346	4186410	5628540	4062826	4579579	4442940	324396
178.5	3615847	4115050	5334120	3955991	3837165	4171635	301815
179.5	3486473	4044707	5053085	3854045	3178452	3923352	319497
180.5	3369086	3975224	4785663	3756728	2603745	3698089	358392
181.5	3263487	3906456	4531914	3663782	2110292	3495186	402740
182.5	3169437	3838269	4291742	3574953	1693001	3313480	444267
183.5	3086664	3770541	4064928	3489990	1345168	3151458	479540
184.5	3014872	3703161	3851140	3408647	1059155	3007395	507577
185.5	2953752	3636035	3649958	3330682	826965	2879478	528580
186.5	2902982	3569081	3460893	3255862	640712	2765906	543295
187.5	2862236	3502230	3283400	3183959	492959	2664957	552691
188.5	2831179	3435430	3116896	3114755	376942	2575040	557782
189.5	2809467	3368640	2960771	3048042	286691	2494722	559534
190.5	2796745	3301836	2814402	2983619	217074	2422735	558822
191.5	2792635	3235005	2677157	2921299	163773	2357974	556410
192.5	2796731	3168149	2548411	2860903	123232	2299485	552949
193.5	2808583	3101282	2427547	2802267	92569	2246450	548984
194.5	2827687	3034431	2313964	2745235	69484	2198160	544959
195.5	2853464	2967630	2207080	2689668	52168	2154002	541235
196.5	2885245	2900929	2106339	2635435	39216	2113433	538087
197.5	2922249	2834381	2011210	2582420	29545	2075961	535720
198.5	2963568	2768050	1921192	2530520	22331	2041132	534263
199.5	3008143	2702007	1835813	2479643	16949	2008511	533775
200.5	3054752	2636327	1754636	2429708	12931	1977671	534239
201.5	3101993	2571089	1677254	2380649	9926	1948182	535563
202.5	3148284	2506375	1603296	2332408	7673	1919607	537582
203.5	3191859	2442270	1532424	2284938	5979	1891494	540056
204.5	3230783	2378857	1464335	2238202	4700	1863375	542675
205.5	3262981	2316220	1398758	2192174	3730	1834773	545075
206.5	3286272	2254441	1335460	2146832	2992	1805200	546842
207.5	3298433	2193599	1274237	2102166	2426	1774172	547535
208.5	3297267	2133770	1214918	2058168	1991	1741223	546706
209.5	3280694	2075024	1157365	2014837	1655	1705915	543922
210.5	3246852	2017427	1101466	1972179	1393	1667864	538792
211.5	3194207	1961039	1047140	1930199	1189	1626755	530997
212.5	3121661	1905914	994327	1888908	1030	1582368	520312
213.5	3028656	1852100	942993	1848317	904	1534594	506638
214.5	2915262	1799636	893122	1808438	806	1483453	490020
215.5	2782239	1748557	844716	1769285	730	1429106	470665
216.5	2631060	1698890	797790	1730869	671	1371856	448951
217.5	2463901	1650654	752371	1693201	626	1312150	425427
218.5	2283574	1603862	708490	1656290	594	1250562	400800
219.5	2093428	1558521	666187	1620141	572	1187770	375906
220.5	1897197	1514631	625499	1584761	560	1124529	351664
221.5	1698825	1472186	586464	1550148	556	1061636	329005
222.5	1502269	1431176	549115	1516302	561	999884	308782
223.5	1311299	1391583	513481	1483215	575	940031	291660
224.5	1129315	1353386	479582	1450879	598	882752	278011
225.5	959190	1316560	447428	1419280	631	828618	267851
226.5	803157	1281074	417023	1388403	675	778066	260849
227.5	662743	1246896	388358	1358225	733	731391	256409
228.5	538762	1213989	361415	1328724	806	688739	253807
229.5	431347	1182315	336167	1299873	897	650120	252322
230.5	340033	1151833	312576	1271641	1012	615419	251338
231.5	263864	1122499	290598	1243995	1155	584422	250385
232.5	201520	1094269	270180	1216899	1333	556840	249151
233.5	151450	1067098	251263	1190314	1554	532336	247458
234.5	111989	1040939	233785	1164202	1830	510549	245237
235.5	81470	1015747	217677	1138520	2176	491118	242488
236.5	58306	991474	202871	1113224	2608	473697	239260
237.5	41050	968075	189294	1088272	3152	457968	235622
238.5	28431	945502	176876	1063618	3835	443652	231649
239.5	19373	923711	165545	1039218	4697	430509	227413
240.5	12988	902656	155232	1015029	5785	418338	222973
241.5	8568	882295	145870	991006	7160	406980	218378
242.5	5562	862585	137392	967109	8899	396310	213662
243.5	3554	843485	129739	943297	11100	386235	208849
244.5	2236	824956	122851	919533	13882	376692	203948
245.5	1385	806959	116674	895782	17399	367640	198964
246.5	846	789459	111158	872012	21835	359062	193889
247.5	508	772422	106256	848196	27419	350960	188713
248.5	301	755814	101926	824311	34431	343357	183419
249.5	176	739606	98128	800336	43204	336290	177988
250.5	102	723769	94829	776259	54140	329820	172400
251.5	58	708277	91998	752070	67708	324022	166638
252.5	32	693105	89607	727766	84454	318993	160689
253.5	18	678230	87635	703349	105003	314847	154557
254.5	10	663633	86059	678828	130056	311717	148273
255.5	5	649295	84866	654215	160382	309753	141911
256.5	3	635200	84040	629533	196810	309117	135614
257.5	2	621333	83572	604805	240202	309983	129630
258.5	0	607681	83455	580064	291423	312525	124355
259.5	0	594234	83684	555345	351302	316913	120368
260.5	0	580983	84259	530690	420580	323302	118435
261.5	0	567920	85180	506145	499845	331818	119436
262.5	0	555038	86452	481759	589467	342543	124182
263.5	0	542334	88081	457585	689524	355505	133190
264.5	0	529804	90075	433676	799726	370656	146546
265.5	0	517446	92446	410091	919351	387867	163932
266.5	0	505258	95207	386887	1047185	406907	184765
267.5	0	493242	98374	364120	1181492	427446	208318
268.5	0	481397	101963	341848	1320005	449043	233796
269.5	0	469725	105994	320125	1459947	471158	260370
270.5	0	458228	110488	299005	1598098	493164	287180
271.5	0	446909	115465	278536	1730894	514361	313353
272.5	0	435770	120949	258763	1854565	534010	338014
273.5	0	424815	126964	239728	1965301	551362	360310
274.5	0	414047	133531	221467	2059443	565697	379444
275.5	0	403470	140674	204009	2133680	576366	394702
276.5	0	393086	148415	187378	2185242	582824	405495
277.5	0	382900	156773	171594	2212071	584668	411383
278.5	0	372915	165766	156667	2212955	581661	412105
279.5	0	363132	175409	142605	2187614	573752	407595
280.5	0	353556	185709	129406	2136732	561081	397982
281.5	0	344189	196672	117065	2061923	543970	383592
282.5	0	335032	208296	105569	1965646	522909	364923
283.5	0	326087	220570	94902	1851062	498524	342621
284.5	0	317355	233476	85043	1721856	471546	317448
285.5	0	308838	246985	75965	1582031	442764	290239
286.5	0	300535	261058	67638	1435694	412985	261866
287.5	0	292446	275644	60031	1286849	382994	233202
288.5	0	284570	290678	53108	1139220	353515	205092
289.5	0	276907	306083	46832	996094	325183	178331
290.5	0	269455	321768	41165	860217	298521	153661
291.5	0	262212	337627	36067	733731	273927	131763
292.5	0	255175	353541	31499	618154	251674	113250
293.5	0	248343	369376	27421	514397	231907	98632
294.5	0	241711	384987	23795	422824	214664	88200
295.5	0	235277	400219	20583	343320	199880	81873
296.5	0	229037	414906	17748	275383	187415	79099
297.5	0	222986	428875	15255	218223	177068	78976
298.5	0	217121	441948	13072	170849	168598	80528
299.5	0	211437	453949	11166	132163	161743	82935
300.5	0	205929	464700	9510	101022	156232	85617
301.5	0	200592	474032	8074	76309	151801	88208
302.5	0	195421	481785	6835	56966	148201	90493
303.5	0	190411	487810	5768	42032	145204	92356
304.5	0	185556	491979	4854	30656	142609	93742
305.5	0	180851	494182	4073	22104	140242	94628
306.5	0	176292	494336	3408	15757	137959	95012
307.5	0	171871	492384	2843	11107	135641	94900
308.5	0	167583	488296	2366	7742	133198	94307
309.5	0	163424	482078	1963	5338	130561	93249
310.5	0	159387	473764	1625	3640	127683	91749
311.5	0	155467	463422	1341	2456	124537	89830
312.5	0	151657	451149	1104	1639	121110	87522
313.5	0	147954	437075	907	1083	117404	84855
314.5	0	144352	421354	743	708	113431	81867
315.5	0	140844	404165	608	458	109215	78596
316.5	0	137427	385706	496	293	104784	75086
317.5	0	134095	366192	403	186	100175	71380
318.5	0	130842	345849	327	117	95427	67528
319.5	0	127665	324907	265	73	90582	63576
320.5	0	124559	303598	214	45	85683	59573
321.5	0	121519	282149	173	27	80774	55567
322.5	0	118540	260780	139	17	75895	51603
323.5	0	115619	239696	112	10	71087	47726
324.5	0	112751	219087	90	6	66387	43975
325.5	0	109934	199122	72	3	61826	40387
326.5	0	107162	179949	58	2	57434	36995
327.5	0	104433	161692	46	1	53234	33824
328.5	0	101744	144449	37	0	49246	30896
329.5	0	99091	128296	29	0	45483	28227
330.5	0	96472	113285	23	0	41956	25825
331.5	0	93885	99443	18	0	38669	23692
332.5	0	91327	86777	15	0	35624	21824
333.5	0	88795	75275	12	0	32816	20207
334.5	0	86290	64909	9	0	30242	18823
335.5	0	83808	55636	7	0	27890	17649
336.5	0	81348	47402	6	0	25751	16657
337.5	0	78910	40143	5	0	23812	15817
338.5	0	76493	33791	4	0	22058	15100
339.5	0	74096	28273	3	0	20474	14480
340.5	0	71720	23512	2	0	19047	13933
341.5	0	69363	19435	2	0	17760	13438
342.5	0	67026	15968	1	0	16599	12980
343.5	0	64710	13039	1	0	15550	12547
344.5	0	62416	10583	0	0	14600	12128
345.5	0	60143	8538	0	0	13736	11719
346.5	0	57894	6846	0	0	12948	11314
347.5	0	55670	5457	0	0	12225	10912
348.5	0	53471	4323	0	0	11559	10511
349.5	0	51300	3404	0	0	10941	10111
350.5	0	49158	2664	0	0	10365	9712
351.5	0	47047	2073	0	0	9824	9314
352.5	0	44969	1603	0	0	9315	8919
353.5	0	42926	1233	0	0	8832	8527
354.5	0	40919	942	0	0	8372	8139
355.5	0	38952	716	0	0	7934	7756
356.5	0	37025	541	0	0	7513	7379
357.5	0	35142	406	0	0	7110	7009
358.5	0	33303	303	0	0	6721	6646
359.5	0	31511	225	0	0	6347	6291
360.5	0	29768	166	0	0	5987	5945
361.5	0	28074	122	0	0	5639	5609
362.5	0	26433	89	0	0	5304	5282
363.5	0	24845	65	0	0	4982	4966
364.5	0	23311	47	0	0	4672	4660
365.5	0	21833	33	0	0	4373	4365
366.5	0	20411	24	0	0	4087	4081
367.5	0	19047	17	0	0	3813	3808
368.5	0	17740	12	0	0	3550	3547
369.5	0	16491	8	0	0	3300	3298
370.5	0	15299	6	0	0	3061	3060
371.5	0	14166	4	0	0	2834	2833
372.5	0	13090	3	0	0	2619	2618
373.5	0	12072	2	0	0	2415	2414
374.5	0	11109	1	0	0	2222	2222
375.5	0	10202	0	0	0	2041	2040
376.5	0	9348	0	0	0	1870	1870
377.5	0	8548	0	0	0	1710	1710
378.5	0	7799	0	0	0	1560	1560
379.5	0	7100	0	0	0	1420	1420
380.5	0	6450	0	0	0	1290	1290
381.5	0	5845	0	0	0	1169	1169
382.5	0	5286	0	0	0	1057	1057
383.5	0	4769	0	0	0	954	954
384.5	0	4292	0	0	0	858	858
385.5	0	3854	0	0	0	771	771
386.5	0	3453	0	0	0	691	691
387.5	0	3086	0	0	0	617	617
388.5	0	2752	0	0	0	550	550
389.5	1	2447	0	0	0	490	489
390.5	2	2172	0	0	0	435	434
391.5	4	1922	0	0	0	385	384
392.5	6	1697	0	0	0	341	339
393.5	9	1495	0	0	0	301	299
394.5	13	1313	0	0	0	265	262
395.5	20	1151	0	0	0	234	229
396.5	31	1006	0	0	0	207	200
397.5	46	878	0	0	0	185	173
398.5	69	763	0	0	0	166	150
399.5	102	662	0	0	0	153	129
400.5	149	573	0	0	0	144	111
401.5	216	495	0	0	0	142	98
402.5	311	426	0	0	0	147	92
403.5	443	366	0	0	0	162	100
404.5	625	314	0	0	0	188	125
405.5	874	268	0	0	0	228	170
406.5	1212	228	0	0	0	288	235
407.5	1663	194	0	0	0	372	325
408.5	2261	165	0	0	0	485	445
409.5	3044	139	0	0	0	637	602
410.5	4057	117	0	0	0	835	806
411.5	5353	99	0	0	0	1090	1066
412.5	6990	83	0	0	0	1415	1394
413.5	9035	69	0	0	0	1821	1804
414.5	11557	58	0	0	0	2323	2309
415.5	14627	48	0	0	0	2935	2923
416.5	18316	40	0	0	0	3671	3661
417.5	22689	33	0	0	0	4544	4536
418.5	27801	27	0	0	0	5566	5559
419.5	33693	23	0	0	0	6743	6737
420.5	40382	19	0	0	0	8080	8075
421.5	47860	15	0	0	0	9575	9571
422.5	56087	12	0	0	0	11220	11217
423.5	64985	10	0	0	0	12999	12997
424.5	74436	8	0	0	0	14889	14887
425.5	84284	7	0	0	0	16858	16856
426.5	94331	5	0	0	0	18867	18866
427.5	104347	4	0	0	0	20870	20869
428.5	114076	4	0	0	0	22816	22815
429.5	123244	3	0	0	0	24649	24649
430.5	131571	2	0	0	0	26315	26314
431.5	138788	2	0	0	0	27758	27758
432.5	144648	1	0	0	0	28930	28930
433.5	148941	1	0	0	0	29788	29788
434.5	151507	0	0	0	0	30302	30301
435.5	152246	0	0	0	0	30449	30449
436.5	151121	0	0	0	0	30224	30224
437.5	148168	0	0	0	0	29634	29634
438.5	143485	0	0	0	0	28697	28697
439.5	137235	0	0	0	0	27447	27447
440.5	129631	0	0	0	0	25926	25926
441.5	120926	0	0	0	0	24185	24185
442.5	111399	0	0	0	0	22280	22280
443.5	101339	0	0	0	0	20268	20268
444.5	91031	0	0	0	0	18206	18206
445.5	80743	0	0	0	0	16149	16149
446.5	70714	0	0	0	0	14143	14143
447.5	61148	0	0	0	0	12230	12230
448.5	52207	0	0	0	0	10441	10441
449.5	44007	0	0	0	0	8801	8801
450.5	36623	0	0	0	0	7325	7325
451.5	30090	0	0	0	0	6018	6018
452.5	24406	0	0	0	0	4881	4881
453.5	19543	0	0	0	0	3909	3909
454.5	15449	0	0	0	0	3090	3090
455.5	12056	0	0	0	0	2411	2411
456.5	9287	0	0	0	0	1857	1857
457.5	7063	0	0	0	0	1413	1413
458.5	5302	0	0	0	0	1060	1060
459.5	3929	0	0	0	0	786	786
460.5	2874	0	0	0	0	575	575
461.5	2075	0	0	0	0	415	415
462.5	1479	0	0	0	0	296	296
463.5	1040	0	0	0	0	208	208
464.5	723	0	0	0	0	145	145
465.5	495	0	0	0	0	99	99
466.5	335	0	0	0	0	67	67
467.5	224	0	0	0	0	45	45
468.5	148	0	0	0	0	30	30
469.5	96	0	0	0	0	19	19
470.5	62	0	0	0	0	12	12
471.5	39	0	0	0	0	8	8
472.5	24	0	0	0	0	5	5
473.5	15	0	0	0	0	3	3
474.5	9	0	0	0	0	2	2
475.5	6	0	0	0	0	1	1
476.5	3	0	0	0	0	0	0
477.5	2	0	0	0	0	0	0
478.5	1	0	0	0	0	0	0
479.5	0	0	0	0	0	0	0
480.5	0	0	0	0	0	0	0
481.5	0	0	0	0	0	0	0
482.5	0	0	0	0	0	0	0
483.5	0	0	0	0	0	0	0
484.5	0	0	0	0	0	0	0
485.5	0	0	0	0	0	0	0
486.5	0	0	0	0	0	0	0
487.5	0	0	0	0	0	0	0
488.5	0	0	0	0	0	0	0
489.5	0	0	0	0	0	0	0
490.5	0	0	0	0	0	0	0
491.5	0	0	0	0	0	0	0
492.5	0	0	0	0	0	0	0
493.5	0	0	0	0	0	0	0
494.5	0	0	0	0	0	0	0
495.5	0	0	0	0	0	0	0
496.5	0	0	0	0	0	0	0
497.5	0	0	0	0	0	0	0
498.5	0	0	0	0	0	0	0
499.5	0	0	0	0	0	0	0
500.5	0	0	0	0	0	0	0
501.5	0	0	0	0	0	0	0
502.5	0	0	0	0	0	0	0
503.5	0	0	0	0	0	0	0
504.5	0	0	0	0	0	0	0
505.5	0	0	0	0	0	0	0
506.5	0	0	0	0	0	0	0
507.5	0	0	0	0	0	0	0
508.5	0	0	0	0	0	0	0
509.5	0	0	0	0	0	0	0
510.5	0	0	0	0	0	0	0
511.5	0	0	0	0	0	0	0
512.5	0	0	0	0	0	0	0
513.5	0	0	0	0	0	0	0
514.5	0	0	0	0	0	0	0
515.5	0	0	0	0	0	0	0
516.5	0	0	0	0	0	0	0
517.5	0	0	0	0	0	0	0
518.5	0	0	0	0	0	0	0
519.5	0	0	0	0	0	0	0
520.5	0	0	0	0	0	0	0
521.5	0	0	0	0	0	0	0
522.5	0	0	0	0	0	0	0
523.5	0	0	0	0	0	0	0
524.5	0	0	0	0	0	0	0
525.5	0	0	0	0	0	0	0
526.5	0	0	0	0	0	0	0
527.5	0	0	0	0	0	0	0
528.5	0	0	0	0	0	0	0
529.5	0	0	0	0	0	0	0
530.5	0	0	0	0	0	0	0
531.5	0	0	0	0	0	0	0
532.5	0	0	0	0	0	0	0
533.5	0	0	0	0	0	0	0
534.5	0	0	0	0	0	0	0
535.5	0	0	0	0	0	0	0
536.5	0	0	0	0	0	0	0
537.5	0	0	0	0	0	0	0
538.5	0	0	0	0	0	0	0
539.5	0	0	0	0	0	0	0
540.5	0	0	0	0	0	0	0
541.5	0	0	0	0	0	0	0
542.5	0	0	0	0	0	0	0
543.5	0	0	0	0	0	0	0
544.5	0	0	0	0	0	0	0
545.5	0	0	0	0	0	0	0
546.5	0	0	0	0	0	0	0
547.5	0	0	0	0	0	0	0
548.5	0	0	0	0	0	0	0
549.5	0	0	0	0	0	0	0
550.5	0	0	0	0	0	0	0
551.5	0	0	0	0	0	0	0
552.5	0	0	0	0	0	0	0
553.5	0	0	0	0	0	0	0
554.5	0	0	0	0	0	0	0
555.5	0	0	0	0	0	0	0
556.5	0	0	0	0	0	0	0
557.5	0	0	0	0	0	0	0
558.5	0	0	0	0	0	0	0
559.5	0	0	0	0	0	0	0
560.5	0	0	0	0	0	0	0
561.5	0	0	0	0	0	0	0
562.5	0	0	0	0	0	0	0
563.5	0	0	0	0	0	0	0
564.5	0	0	0	0	0	0	0
565.5	0	0	0	0	0	0	0
566.5	0	0	0	0	0	0	0
567.5	0	0	0	0	0	0	0
568.5	0	0	0	0	0	0	0
569.5	0	0	0	0	0	0	0
570.5	0	0	0	0	0	0	0
571.5	0	0	0	0	0	0	0
572.5	0	0	0	0	0	0	0
573.5	0	0	0	0	0	0	0
574.5	0	0	0	0	0	0	0
575.5	0	0	0	0	0	0	0
576.5	0	0	0	0	0	0	0
577.5	0	0	0	0	0	0	0
578.5	0	0	0	0	0	0	0
579.5	0	0	0	0	0	0	0
580.5	0	0	0	0	0	0	0
581.5	0	0	0	0	0	0	0
582.5	0	0	0	0	0	0	0
583.5	0	0	0	0	0	0	0
584.5	0	0	0	0	0	0	0
585.5	0	0	0	0	0	0	0
586.5	0	0	0	0	0	0	0
587.5	0	0	0	0	0	0	0
588.5	0	0	0	0	0	0	0
589.5	0	0	0	0	0	0	0
590.5	0	0	0	0	0	0	0
591.5	0	0	0	0	0	0	0
592.5	0	0	0	0	0	0	0
593.5	0	0	0	0	0	0	0
594.5	0	0	0	0	0	0	0
595.5	0	0	0	0	0	0	0
596.5	0	0	0	0	0	0	0
597.5	0	0	0	0	0	0	0
598.5	0	0	0	0	0	0	0
599.5	0	0	0	0	0	0	0
600.5	0	0	0	0	0	0	0
601.5	0	0	0	0	0	0	0
602.5	0	0	0	0	0	0	0
603.5	0	0	0	0	0	0	0
604.5	0	0	0	0	0	0	0
605.5	0	0	0	0	0	0	0
606.5	0	0	0	0	0	0	0
607.5	0	0	0	0	0	0	0
608.5	0	0	0	0	0	0	0
609.5	0	0	0	0	0	0	0
610.5	0	0	0	0	0	0	0
611.5	0	0	0	0	0	0	0
612.5	0	0	0	0	0	0	0
613.5	0	0	0	0	0	0	0
614.5	0	0	0	0	0	0	0
615.5	0	0	0	0	0	0	0
616.5	0	0	0	0	0	0	0
617.5	0	0	0	0	0	0	0
618.5	0	0	0	0	0	0	0
619.5	0	0	0	0	0	0	0
620.5	0	0	0	0	0	0	0
621.5	0	0	0	0	0	0	0
622.5	0	0	0	0	0	0	0
623.5	0	0	0	0	0	0	0
624.5	0	0	0	0	0	0	0
625.5	0	0	0	0	0	0	0
626.5	0	0	0	0	0	0	0
627.5	0	0	0	0	0	0	0
628.5	0	0	0	0	0	0	0
629.5	0	0	0	0	0	0	0
630.5	0	0	0	0	0	0	0
631.5	0	0	0	0	0	0	0
632.5	0	0	0	0	0	0	0
633.5	0	0	0	0	0	0	0
634.5	0	0	0	0	0	0	0
635.5	0	0	0	0	0	0	0
636.5	0	0	0	0	0	0	0
637.5	0	0	0	0	0	0	0
638.5	0	0	0	0	0	0	0
639.5	0	0	0	0	0	0	0
640.5	0	0	0	0	0	0	0
641.5	0	0	0	0	0	0	0
642.5	0	0	0	0	0	0	0
643.5	0	0	0	0	0	0	0
644.5	0	0	0	0	0	0	0
645.5	0	0	0	0	0	0	0
646.5	0	0	0	0	0	0	0
647.5	0	0	0	0	0	0	0
648.5	0	0	0	0	0	0	0
649.5	0	0	0	0	0	0	0
650.5	0	0	0	0	0	0	0
651.5	0	0	0	0	0	0	0
652.5	0	0	0	0	0	0	0
653.5	0	0	0	0	0	0	0
654.5	0	0	0	0	0	0	0
655.5	0	0	0	0	0	0	0
656.5	0	0	0	0	0	0	0
657.5	0	0	0	0	0	0	0
658.5	0	0	0	0	0	0	0
659.5	0	0	0	0	0	0	0
660.5	0	0	0	0	0	0	0
661.5	0	0	0	0	0	0	0
662.5	0	0	0	0	0	0	0
663.5	0	0	0	0	0	0	0
664.5	0	0	0	0	0	0	0
665.5	0	0	0	0	0	0	0
666.5	0	0	0	0	0	0	0
667.5	0	0	0	0	0	0	0
668.5	0	0	0	0	0	0	0
669.5	0	0	0	0	0	0	0
670.5	0	0	0	0	0	0	0
671.5	0	0	0	0	0	0	0
672.5	0	0	0	0	0	0	0
673.5	0	0	0	0	0	0	0
674.5	0	0	0	0	0	0	0
675.5	0	0	0	0	0	0	0
676.5	0	0	0	0	0	0	0
677.5	0	0	0	0	0	0	0
678.5	0	0	0	0	0	0	0
679.5	0	0	0	0	0	0	0
680.5	0	0	0	0	0	0	0
681.5	0	0	0	0	0	0	0
682.5	0	0	0	0	0	0	0
683.5	0	0	0	0	0	0	0
684.5	0	0	0	0	0	0	0
685.5	0	0	0	0	0	0	0
686.5	0	0	0	0	0	0	0
687.5	0	0	0	0	0	0	0
688.5	0	0	0	0	0	0	0
689.5	0	0	0	0	0	0	0
690.5	0	0	0	0	0	0	0
691.5	0	0	0	0	0	0	0
692.5	0	0	0	0	0	0	0
693.5	0	0	0	0	0	0	0
694.5	0	0	0	0	0	0	0
695.5	0	0	0	0	0	0	0
696.5	0	0	0	0	0	0	0
697.5	0	0	0	0	0	0	0
698.5	0	0	0	0	0	0	0
699.5	0	0	0	0	0	0	0
700.5	0	0	0	0	0	0	0
701.5	0	0	0	0	0	0	0
702.5	0	0	0	0	0	0	0
703.5	0	0	0	0	0	0	0
704.5	0	0	0	0	0	0	0
705.5	0	0	0	0	0	0	0
706.5	0	0	0	0	0	0	0
707.5	0	0	0	0	0	0	0
708.5	0	0	0	0	0	0	0
709.5	0	0	0	0	0	0	0
710.5	0	0	0	0	0	0	0
711.5	0	0	0	0	0	0	0
712.5	0	0	0	0	0	0	0
713.5	0	0	0	0	0	0	0
714.5	0	0	0	0	0	0	0
715.5	0	0	0	0	0	0	0
716.5	0	0	0	0	0	0	0
717.5	0	0	0	0	0	0	0
718.5	0	0	0	0	0	0	0
719.5	0	0	0	0	0	0	0
720.5	0	0	0	0	0	0	0
721.5	0	0	0	0	0	0	0
722.5	0	0	0	0	0	0	0
723.5	0	0	0	0	0	0	0
724.5	0	0	0	0	0	0	0
725.5	0	0	0	0	0	0	0
726.5	0	0	0	0	0	0	0
727.5	0	0	0	0	0	0	0
728.5	0	0	0	0	0	0	0
729.5	0	0	0	0	0	0	0
730.5	0	0	0	0	0	0	0
731.5	0	0	0	0	0	0	0
732.5	0	0	0	0	0	0	0
733.5	0	0	0	0	0	0	0
734.5	0	0	0	0	0	0	0
735.5	0	0	0	0	0	0	0
736.5	0	0	0	0	0	0	0
737.5	0	0	0	0	0	0	0
738.5	0	0	0	0	0	0	0
739.5	0	0	0	0	0	0	0
740.5	0	0	0	0	0	0	0
741.5	0	0	0	0	0	0	0
742.5	0	0	0	0	0	0	0
743.5	0	0	0	0	0	0	0
744.5	0	0	0	0	0	0	0
745.5	0	0	0	0	0	0	0
746.5	0	0	0	0	0	0	0
747.5	0	0	0	0	0	0	0
748.5	0	0	0	0	0	0	0
749.5	0	0	0	0	0	0	0
750.5	0	0	0	0	0	0	0
751.5	0	0	0	0	0	0	0
752.5	0	0	0	0	0	0	0
753.5	0	0	0	0	0	0	0
754.5	0	0	0	0	0	0	0
755.5	0	0	0	0	0	0	0
756.5	0	0	0	0	0	0	0
757.5	0	0	0	0	0	0	0
758.5	0	0	0	0	0	0	0
759.5	0	0	0	0	0	0	0
760.5	0	0	0	0	0	0	0
761.5	0	0	0	0	0	0	0
762.5	0	0	0	0	0	0	0
763.5	0	0	0	0	0	0	0
764.5	0	0	0	0	0	0	0
765.5	0	0	0	0	0	0	0
766.5	0	0	0	0	0	0	0
767.5	0	0	0	0	0	0	0
768.5	0	0	0	0	0	0	0
769.5	0	0	0	0	0	0	0
770.5	0	0	0	0	0	0	0
771.5	0	0	0	0	0	0	0
772.5	0	0	0	0	0	0	0
773.5	0	0	0	0	0	0	0
774.5	0	0	0	0	0	0	0
775.5	0	0	0	0	0	0	0
776.5	0	0	0	0	0	0	0
777.5	0	0	0	0	0	0	0
778.5	0	0	0	0	0	0	0
779.5	0	0	0	0	0	0	0
780.5	0	0	0	0	0	0	0
781.5	0	0	0	0	0	0	0
782.5	0	0	0	0	0	0	0
783.5	0	0	0	0	0	0	0
784.5	0	0	0	0	0	0	0
785.5	0	0	0	0	0	0	0
786.5	0	0	0	0	0	0	0
787.5	0	0	0	0	0	0	0
788.5	0	0	0	0	0	0	0
789.5	0	0	0	0	0	0	0
790.5	0	0	0	0	0	0	0
791.5	0	0	0	0	0	0	0
792.5	0	0	0	0	0	0	0
793.5	0	0	0	0	0	0	0
794.5	0	0	0	0	0	0	0
795.5	0	0	0	0	0	0	0
796.5	0	0	0	0	0	0	0
797.5	0	0	0	0	0	0	0
798.5	0	0	0	0	0	0	0
799.5	0	0	0	0	0	0	0
800.5	0	0	0	0	0	0	0
801.5	0	0	0	0	0	0	0
802.5	0	0	0	0	0	0	0
803.5	0	0	0	0	0	0	0
804.5	0	0	0	0	0	0	0
805.5	0	0	0	0	0	0	0
806.5	0	0	0	0	0	0	0
807.5	0	0	0	0	0	0	0
808.5	0	0	0	0	0	0	0
809.5	0	0	0	0	0	0	0
810.5	0	0	0	0	0	0	0
811.5	0	0	0	0	0	0	0
812.5	0	0	0	0	0	0	0
813.5	0	0	0	0	0	0	0
814.5	0	0	0	0	0	0	0
815.5	0	0	0	0	0	0	0
816.5	0	0	0	0	0	0	0
817.5	0	0	0	0	0	0	0
818.5	0	0	0	0	0	0	0
819.5	0	0	0	0	0	0	0
820.5	0	0	0	0	0	0	0
821.5	0	0	0	0	0	0	0
822.5	0	0	0	0	0	0	0
823.5	0	0	0	0	0	0	0
824.5	0	0	0	0	0	0	0
825.5	0	0	0	0	0	0	0
826.5	0	0	0	0	0	0	0
827.5	0	0	0	0	0	0	0
828.5	0	0	0	0	0	0	0
829.5	0	0	0	0	0	0	0
830.5	0	0	0	0	0	0	0
831.5	0	0	0	0	0	0	0
832.5	0	0	0	0	0	0	0
833.5	0	0	0	0	0	0	0
834.5	0	0	0	0	0	0	0
835.5	0	0	0	0	0	0	0
836.5	0	0	0	0	0	0	0
837.5	0	0	0	0	0	0	0
838.5	0	0	0	0	0	0	0
839.5	0	0	0	0	0	0	0
840.5	0	0	0	0	0	0	0
841.5	0	0	0	0	0	0	0
842.5	0	0	0	0	0	0	0
843.5	0	0	0	0	0	0	0
844.5	0	0	0	0	0	0	0
845.5	0	0	0	0	0	0	0
846.5	0	0	0	0	0	0	0
847.5	0	0	0	0	0	0	0
848.5	0	0	0	0	0	0	0
849.5	0	0	0	0	0	0	0
850.5	0	0	0	0	0	0	0
851.5	0	0	0	0	0	0	0
852.5	0	0	0	0	0	0	0
853.5	0	0	0	0	0	0	0
854.5	0	0	0	0	0	0	0
855.5	0	0	0	0	0	0	0
856.5	0	0	0	0	0	0	0
857.5	0	0	0	0	0	0	0
858.5	0	0	0	0	0	0	0
859.5	0	0	0	0	0	0	0
860.5	0	0	0	0	0	0	0
861.5	0	0	0	0	0	0	0
862.5	0	0	0	0	0	0	0
863.5	0	0	0	0	0	0	0
864.5	0	0	0	0	0	0	0
865.5	0	0	0	0	0	0	0
866.5	0	0	0	0	0	0	0
867.5	0	0	0	0	0	0	0
868.5	0	0	0	0	0	0	0
869.5	0	0	0	0	0	0	0
870.5	0	0	0	0	0	0	0
871.5	0	0	0	0	0	0	0
872.5	0	0	0	0	0	0	0
873.5	0	0	0	0	0	0	0
874.5	0	0	0	0	0	0	0
875.5	0	0	0	0	0	0	0
876.5	0	0	0	0	0	0	0
877.5	0	0	0	0	0	0	0
878.5	0	0	0	0	0	0	0
879.5	0	0	0	0	0	0	0
880.5	0	0	0	0	0	0	0
881.5	0	0	0	0	0	0	0
882.5	0	0	0	0	0	0	0
883.5	0	0	0	0	0	0	0
884.5	0	0	0	0	0	0	0
885.5	0	0	0	0	0	0	0
886.5	0	0	0	0	0	0	0
887.5	0	0	0	0	0	0	0
888.5	0	0	0	0	0	0	0
889.5	0	0	0	0	0	0	0
890.5	0	0	0	0	0	0	0
891.5	0	0	0	0	0	0	0
892.5	0	0	0	0	0	0	0
893.5	0	0	0	0	0	0	0
894.5	0	0	0	0	0	0	0
895.5	0	0	0	0	0	0	0
896.5	0	0	0	0	0	0	0
897.5	0	0	0	0	0	0	0
898.5	0	0	0	0	0	0	0
899.5	0	0	0	0	0	0	0
900.5	0	0	0	0	0	0	0
901.5	0	0	0	0	0	0	0
902.5	0	0	0	0	0	0	0
903.5	0	0	0	0	0	0	0
904.5	0	0	0	0	0	0	0
905.5	0	0	0	0	0	0	0
906.5	0	0	0	0	0	0	0
907.5	0	0	0	0	0	0	0
908.5	0	0	0	0	0	0	0
909.5	0	0	0	0	0	0	0
910.5	0	0	0	0	0	0	0
911.5	0	0	0	0	0	0	0
912.5	0	0	0	0	0	0	0
913.5	0	0	0	0	0	0	0
914.5	0	0	0	0	0	0	0
915.5	0	0	0	0	0	0	0
916.5	0	0	0	0	0	0	0
917.5	0	0	0	0	0	0	0
918.5	0	0	0	0	0	0	0
919.5	0	0	0	0	0	0	0
920.5	0	0	0	0	0	0	0
921.5	0	0	0	0	0	0	0
922.5	0	0	0	0	0	0	0
923.5	0	0	0	0	0	0	0
924.5	0	0	0	0	0	0	0
925.5	0	0	0	0	0	0	0
926.5	0	0	0	0	0	0	0
927.5	0	0	0	0	0	0	0
928.5	0	0	0	0	0	0	0
929.5	0	0	0	0	0	0	0
930.5	0	0	0	0	0	0	0
931.5	0	0	0	0	0	0	0
932.5	0	0	0	0	0	0	0
933.5	0	0	0	0	0	0	0
934.5	0	0	0	0	0	0	0
935.5	0	0	0	0	0	0	0
936.5	0	0	0	0	0	0	0
937.5	0	0	0	0	0	0	0
938.5	0	0	0	0	0	0	0
939.5	0	0	0	0	0	0	0
940.5	0	0	0	0	0	0	0
941.5	0	0	0	0	0	0	0
942.5	0	0	0	0	0	0	0
943.5	0	0	0	0	0	0	0
944.5	0	0	0	0	0	0	0
945.5	0	0	0	0	0	0	0
946.5	0	0	0	0	0	0	0
947.5	0	0	0	0	0	0	0
948.5	0	0	0	0	0	0	0
949.5	0	0	0	0	0	0	0
950.5	0	0	0	0	0	0	0
951.5	0	0	0	0	0	0	0
952.5	0	0	0	0	0	0	0
953.5	0	0	0	0	0	0	0
954.5	0	0	0	0	0	0	0
955.5	0	0	0	0	0	0	0
956.5	0	0	0	0	0	0	0
957.5	0	0	0	0	0	0	0
958.5	0	0	0	0	0	0	0
959.5	0	0	0	0	0	0	0
960.5	0	0	0	0	0	0	0
961.5	0	0	0	0	0	0	0
962.5	0	0	0	0	0	0	0
963.5	0	0	0	0	0	0	0
964.5	0	0	0	0	0	0	0
965.5	0	0	0	0	0	0	0
966.5	0	0	0	0	0	0	0
967.5	0	0	0	0	0	0	0
968.5	0	0	0	0	0	0	0
969.5	0	0	0	0	0	0	0
970.5	0	0	0	0	0	0	0
971.5	0	0	0	0	0	0	0
972.5	0	0	0	0	0	0	0
973.5	0	0	0	0	0	0	0
974.5	0	0	0	0	0	0	0
975.5	0	0	0	0	0	0	0
976.5	0	0	0	0	0	0	0
977.5	0	0	0	0	0	0	0
978.5	0	0	0	0	0	0	0
979.5	0	0	0	0	0	0	0
980.5	0	0	0	0	0	0	0
981.5	0	0	0	0	0	0	0
982.5	0	0	0	0	0	0	0
983.5	0	0	0	0	0	0	0
984.5	0	0	0	0	0	0	0
985.5	0	0	0	0	0	0	0
986.5	0	0	0	0	0	0	0
987.5	0	0	0	0	0	0	0
988.5	0	0	0	0	0	0	0
989.5	0	0	0	0	0	0	0
990.5	0	0	0	0	0	0	0
991.5	0	0	0	0	0	0	0
992.5	0	0	0	0	0	0	0
993.5	0	0	0	0	0	0	0
994.5	0	0	0	0	0	0	0
995.5	0	0	0	0	0	0	0
996.5	0	0	0	0	0	0	0
997.5	0	0	0	0	0	0	0
998.5	0	0	0	0	0	0	0
999.5	0	0	0	0	0	0	0
Percentile	Size (nm)	Size (nm)	Size (nm)	Size (nm)	Size (nm)
0	48	30	44	25	58
1	69.1	64.4	71.9	68.4	73.8
2	71.6	68.8	74.5	71.6	75.6
3	73.4	71.6	76.3	73.7	76.8
4	74.9	73.7	77.8	75.4	77.9
5	76.2	75.4	79	76.8	78.8
6	77.4	76.9	80.1	78	79.6
7	78.5	78.2	81.1	79.1	80.4
8	79.5	79.4	82.1	80.2	81.2
9	80.4	80.5	83	81.2	82
10	81.4	81.5	83.8	82.1	82.8
11	82.3	82.5	84.6	83	83.5
12	83.1	83.4	85.4	83.9	84.3
13	84	84.2	86.2	84.7	85.1
14	84.8	85	87	85.5	85.9
15	85.6	85.8	87.7	86.4	86.7
16	86.4	86.6	88.4	87.2	87.6
17	87.2	87.3	89.2	88	88.4
18	88	88	89.9	88.8	89.3
19	88.7	88.7	90.6	89.6	90.2
20	89.5	89.4	91.3	90.4	91
21	90.2	90.1	92	91.2	91.9
22	91	90.7	92.7	92	92.7
23	91.7	91.4	93.4	92.8	93.6
24	92.5	92	94.1	93.6	94.4
25	93.2	92.6	94.8	94.5	95.2
26	94	93.3	95.5	95.3	96
27	94.7	93.9	96.2	96.2	96.8
28	95.5	94.5	96.9	97	97.5
29	96.3	95.1	97.7	97.9	98.2
30	97.1	95.8	98.4	98.8	98.9
31	97.9	96.4	99.1	99.7	99.6
32	98.7	97	99.9	100.7	100.2
33	99.5	97.6	100.6	101.6	100.8
34	100.3	98.2	101.4	102.6	101.5
35	101.2	98.9	102.2	103.5	102.1
36	102	99.5	103	104.5	102.7
37	102.9	100.1	103.8	105.5	103.2
38	103.8	100.8	104.6	106.5	103.8
39	104.8	101.4	105.5	107.5	104.4
40	105.7	102.1	106.4	108.5	105
41	106.7	102.8	107.3	109.5	105.5
42	107.7	103.4	108.2	110.6	106.1
43	108.7	104.1	109.2	111.6	106.7
44	109.8	104.8	110.1	112.6	107.2
45	110.9	105.5	111.2	113.6	107.8
46	112	106.3	112.2	114.7	108.4
47	113.1	107	113.3	115.7	109
48	114.2	107.8	114.5	116.7	109.6
49	115.3	108.5	115.6	117.7	110.2
50	116.5	109.3	116.8	118.7	110.9
51	117.6	110.1	118.1	119.7	111.5
52	118.8	111	119.4	120.7	112.2
53	119.9	111.8	120.7	121.6	112.9
54	121.1	112.7	122.1	122.6	113.7
55	122.2	113.6	123.5	123.6	114.5
56	123.4	114.5	124.9	124.6	115.4
57	124.6	115.5	126.3	125.5	116.4
58	125.7	116.5	127.8	126.5	117.4
59	126.9	117.5	129.3	127.5	118.6
60	128.1	118.6	130.7	128.5	119.9
61	129.2	119.7	132.2	129.5	121.4
62	130.4	120.8	133.6	130.5	123.2
63	131.6	121.9	135	131.5	125.4
64	132.8	123.1	136.4	132.5	127.9
65	134	124.4	137.8	133.5	131
66	135.2	125.7	139.2	134.6	134.4
67	136.4	127	140.5	135.6	137.8
68	137.7	128.4	141.9	136.7	141
69	138.9	129.8	143.2	137.8	143.7
70	140.2	131.3	144.5	139	146.1
71	141.4	132.9	145.7	140.1	148.1
72	142.7	134.5	147	141.3	149.8
73	144.1	136.1	148.2	142.6	151.4
74	145.4	137.8	149.5	143.9	152.8
75	146.8	139.6	150.7	145.2	154.1
76	148.2	141.5	151.9	146.6	155.3
77	149.6	143.4	153.2	148	156.5
78	151	145.5	154.4	149.6	157.5
79	152.5	147.6	155.7	151.2	158.5
80	154.1	149.8	157	152.9	159.5
81	155.7	152.2	158.3	154.7	160.5
82	157.4	154.7	159.6	156.6	161.4
83	159.2	157.3	161	158.6	162.4
84	161.1	160	162.4	160.8	163.3
85	163.1	163	163.9	163.2	164.2
86	165.3	166.1	165.4	165.8	165.2
87	167.7	169.4	167.1	168.6	166.1
88	170.4	173	168.8	171.7	167.1
89	173.4	176.7	170.7	175.1	168.2
90	176.9	180.7	172.8	178.8	169.3
91	181	185.1	175.1	183	170.5
92	185.7	189.8	177.7	187.6	171.8
93	190.8	195	180.8	192.8	173.4
94	196	200.9	184.5	198.5	175.3
95	200.9	207.8	189	205.1	178
96	205.5	216.3	195	212.6	183.5
97	209.9	227.6	203.4	221.7	268.7
98	214.6	243.7	217.4	233.1	276.5
99	220.6	269.5	290.1	248.4	283.2
100	479	434	375	344	328
Weighting	Surface Area
Filename	Capture 2019-07-24 13-50-41	Capture 2019-07-24 13-51-16	Capture 2019-07-24 13-51-51	Capture 2019-07-24 13-52-26	Capture 2019-07-24 13-53-01	Average	Standard Error
Mean	153.7	156	153.7	151.7	158.2	154.7	1.1
Mode	145.3	102.1	156.4	133.6	164	140.3	10.8
SD	61.3	59.2	54.1	47.5	60.1	56.4	2.6
D10	93.1	92.4	94.2	94.3	94.7	93.8	0.4
D50	145.1	142.9	148.5	143.4	154.2	146.8	2.1
D90	210.6	240.4	211.2	223.1	275.5	232.2	12.1
Valid Tracks	2251	2542	2400	2422	2252
Graph Data
Bin centre (nm)	Surface area conc. (nm² / ml)	Surface area conc. (nm² / ml)	Surface area conc. (nm² / ml)	Surface area conc. (nm² / ml)	Surface area conc. (nm² / ml)	Surface area average	Standard Error
0.5	0	0	0	0	0	0	0
1.5	0	0	0	0	0	0	0
2.5	0	0	0	0	0	0	0
3.5	0	0	0	0	0	0	0
4.5	0	0	0	0	0	0	0
5.5	0	0	0	0	0	0	0
6.5	0	0	0	0	0	0	0
7.5	0	0	0	0	0	0	0
8.5	0	0	0	0	0	0	0
9.5	0	0	0	0	0	0	0
10.5	0	0	0	0	0	0	0
11.5	0	0	0	0	0	0	0
12.5	0	0	0	0	0	0	0
13.5	0	0	0	0	0	0	0
14.5	0	0	0	0	0	0	0
15.5	0	0	0	0	0	0	0
16.5	0	0	0	0	0	0	0
17.5	0	0	0	0	0	0	0
18.5	0	0	0	0	0	0	0
19.5	0	0	0	0	0	0	0
20.5	0	0	0	0	0	0	0
21.5	0	0	0	2	0	0	0
22.5	0	0	0	23	0	5	5
23.5	0	0	0	200	0	40	40
24.5	0	3	0	1393	0	279	279
25.5	0	13	0	7785	0	1560	1556
26.5	0	51	0	35438	0	7098	7085
27.5	0	183	0	133468	0	26730	26685
28.5	0	618	0	422265	0	84577	84422
29.5	0	1956	0	1139056	0	228202	227714
30.5	0	5829	0	2657941	0	532754	531298
31.5	0	16404	0	5441306	0	1091542	1087446
32.5	0	43738	0	9907541	0	1990256	1979339
33.5	0	110747	0	16259724	0	3274094	3246478
34.5	0	266860	0	24364509	0	4926274	4859834
35.5	0	613088	0	33755354	0	6873689	6721465
36.5	0	1345220	1	43765799	0	9022204	8689804
37.5	0	2823544	5	53729224	0	11310555	10618754
38.5	0	5678231	20	63158927	0	13767436	12396735
39.5	0	10958148	69	71850881	0	16561820	13984207
40.5	0	20326800	223	79900752	0	20045555	15472859
41.5	0	36302072	669	87663752	0	24793299	17218065
42.5	0	62527328	1896	95697919	0	31645429	20075598
43.5	0	104052386	5100	104724116	0	41756320	25569599
44.5	2	167596411	13100	115622318	0	56646366	35646194
45.5	23	261763805	32296	129472985	0	78253822	52280609
46.5	184	397190105	76745	147648238	0	108983054	77515630
47.5	1260	586607871	176407	171959567	0	151749021	113696986
48.5	7423	844840355	393375	204875035	0	210023238	163581839
49.5	37909	1188749831	852967	249827610	0	287893663	230339631
50.5	169235	1637183639	1801746	311646215	0	390160167	317519458
51.5	666316	2210970312	3712869	397151484	0	522500196	429016374
52.5	2334388	2933018346	7472226	515967773	0	691758546	569044428
53.5	7342065	3828560767	14698125	681609770	2	906442146	742110253
54.5	20911402	4925571328	28274472	912902859	21	1177532017	952968337
55.5	54387001	6255355897	53212959	1235786813	175	1519748569	1206529267
56.5	130193254	7853299077	98002290	1685527118	1282	1953404604	1507695511
57.5	288975519	9759724582	176645915	2309311964	8312	2506933258	1861132511
58.5	598744539	12020810594	311621662	3169141746	47886	3220073285	2271063517
59.5	1165119449	14689489327	537995159	4344821349	246019	4147534261	2741307254
60.5	2140891291	17826253263	908852256	5936748866	1131413	5362775418	3275919114
61.5	3732295447	21499788458	1502045449	8068070689	4674750	6961374959	3880832085
62.5	6198872847	25787357363	2427940711	10885664330	17415908	9063450232	4566596441
63.5	9843967938	30774859329	3837392354	14559346773	58710587	11814855396	5351379433
64.5	14994070767	36556506352	5928601901	19278721864	179705060	15387521189	6261673116
65.5	21967452346	43234064443	8950943840	25247205955	501102326	19980153782	7326364968
66.5	31035536501	50915626790	13203459553	32673023728	1277102713	25820949857	8560044202
67.5	42383377793	59713902469	19025776331	41757338334	2984311059	33172941197	9935900324
68.5	56077357414	69744022089	26779922384	52680131906	6414460838	42339178926	11356438965
69.5	72047810449	81120877457	36822964527	65584912725	12722449737	53659802979	12636818611
70.5	90091484254	93956024745	49472430563	80563700957	23362423856	67489212875	13516795098
71.5	109894183796	108354189526	64968647023	97643943207	39858155434	84143823797	13712009152
72.5	131069135186	124409418880	83439779320	116778959934	63413780215	103822214707	13004595627
73.5	153203095153	142200933962	104875869591	137843220107	94461021599	126516828082	11362968356
74.5	175901103413	161788750002	129117163567	160633204333	132310307329	151950105729	9090957984
75.5	198822113868	183209153964	155859602727	184873953094	175071358363	179567236403	7051382579
76.5	221700775595	206470165255	184677114331	210230722624	219917040954	208599163752	6630255066
77.5	244354179129	231547151407	215057134189	236324607539	263624191697	238181452792	7961254466
78.5	266675373744	258378824169	246443498245	262750625940	303212928638	267492250147	9553066651
79.5	288617300910	286863893551	278279972575	289096638840	336480199489	295867601073	10339698635
80.5	310171405231	316858697200	310048320968	314961578696	362287693100	322865539039	9945056764
81.5	331344868681	348176137754	341296571249	339971737417	380572921442	348272447308	8507165963
82.5	352139591187	380586240950	371655433078	363794236916	392146841380	372064468702	6861075289
83.5	372535082190	413818585191	400843030595	386147199281	398386344924	394346048436	7002334741
84.5	392476562510	447566748181	428659801443	406806488340	400923930624	415286706220	10048250741
85.5	411868886326	481494774280	454976382103	425609173182	401400874464	435070018071	14684911729
86.5	430576360708	515245500758	479717571272	442454054147	401308838954	453860465168	19837643107
87.5	448428104651	548450411012	502845203031	457299698933	401913950300	471787473585	24979645234
88.5	465228197310	580740529809	524342184933	470160477836	404241624866	488942602951	29807202760
89.5	480769497565	611757760655	544199259096	481101083252	409097085528	505384937219	34123822298
90.5	494849696918	641166004863	562405367821	490229988320	417100270492	521150265683	37802080678
91.5	507287947321	668661405063	578941927967	497692256448	428720081834	536260723727	40769819544
92.5	517940343990	693981122716	593780868915	503662065819	444298882986	550732656885	43007206417
93.5	526712681041	716910180948	606885964711	508335264123	464062768814	564581371927	44550755657
94.5	533569237622	737286064668	618216775502	511922219211	488116402422	577822139885	45502037389
95.5	538536852281	755000949260	627734388640	514641180527	516423604326	590467395007	46037483803
96.5	541704124914	770001606005	635408102092	516712313466	548776903723	602520610040	46412048940
97.5	543216152350	782287188158	641222213065	518352514889	584761241763	613967862045	46944286605
98.5	543265665451	791905222467	645182156510	519771064367	623718977376	624768617234	47968571167
99.5	542081729232	798946209160	647319373517	521166114978	664724987517	634847682881	49752157624
100.5	539917268472	803537267750	647694466910	522721982277	706581413108	644090479703	52404080855
101.5	537036603599	805835260206	646398404038	524607153034	747840813617	652343646898	55824303049
102.5	533703968845	806019784996	643551734397	526972908251	786863640751	659422407448	59720990010
103.5	530173695041	804286374885	639301980884	529952438923	821910949255	665125087797	63678107085
104.5	526682431351	800840158316	633819518935	533660327755	851266718303	669253830932	67235201075
105.5	523443501074	795890167821	627292363824	538192275091	873377339228	671639129408	69954724162
106.5	520643266878	789644406532	619920336669	543624960912	886990452732	672164684745	71471066944
107.5	518439233595	782305720468	611909075838	550015955412	891273047211	670788606505	71523639138
108.5	516959540585	774068472930	603464310828	557403616197	885890561965	667557300501	69976951097
109.5	516303479828	765115978820	594786733355	565806938786	871034585988	662609543356	66829899648
110.5	516542704520	755618630712	586067700272	575225356740	847395351332	656169948715	62217085469
111.5	517722849674	745732633406	577485899288	585638516655	816084526218	648532885048	56407439516
112.5	519865356340	735599257699	569205013087	597006079573	778521599634	640039461267	49809729885
113.5	522969363053	725344524787	561372338378	609267622298	736301736992	631051117102	43000150075
114.5	527013593622	715079238250	554118257897	622342727966	691063694031	621923502353	36785849818
115.5	531958224284	704899289000	547556426193	636131363500	644373595926	612983779781	32261022353
116.5	537746752500	694886168517	541784512237	650514640912	597635304796	604513475792	30596861135
117.5	544307913299	685107635998	536885340092	665356049068	552032209755	596737829642	32285826453
118.5	551557697310	675618495043	532928278786	680503222393	508499923488	589821523404	36673188542
119.5	559401518753	666461444603	529970749978	695790283623	467725441026	583869887597	42626805484
120.5	567736563919	657667976921	528059743338	711040761009	430166140917	578934237221	49242605479
121.5	576454324086	649259302006	527233251826	726071038653	396081453053	575019873925	55960934772
122.5	585443285057	641247283750	527521560297	740694255631	365570665306	572095410008	62459993759
123.5	594591712663	633635377213	528948339686	754724528872	338611685218	570102328731	68557677837
124.5	603790444016	626419559950	531531515047	767981340670	315097156722	568964003281	74152373362
125.5	612935571797	619589252639	535283888660	780293907715	294865825372	568593689236	79189714866
126.5	621930896715	613128225786	540213509693	791505337563	277728261610	568901246273	83643721889
127.5	630690023273	607015490072	546323789972	801476381998	263486923667	569798521796	87505818884
128.5	639137986632	601226168046	553613371751	810088614928	251951085474	571203445366	90778320649
129.5	647212322455	595732344510	562075758776	817246893820	242947430204	573042949953	93470530672
130.5	654863524623	590503892192	571698726781	822881005364	236327190579	575254867908	95596388927
131.5	662054874039	585509268313	582463534428	826946444324	231970672451	577788958711	97173025854
132.5	668761661347	580716276550	594343960963	829424324905	229789883949	580607221543	98219822450
133.5	674969863409	576092787857	607305202692	830320472128	229729848390	583683634895	98757730685
134.5	680674364407	571607412704	621302666961	829663782795	231769030090	587003451391	98808715368
135.5	685876835368	567230116763	636280709499	827503978607	235919161850	590562160417	98395258751
136.5	690583399508	562932771882	652171368585	823908896074	242224636772	594364214564	97539934707
137.5	694802215285	558689634530	668893157133	818961468356	250761516054	598421598271	96265118280
138.5	698541105306	554477744722	686349980806	812756553669	261636106916	602752298284	94592955311
139.5	701805349024	550277239768	704430256103	805397754714	274982978507	607378715623	92545781926
140.5	704595742284	546071578981	723006306119	796994355913	290962206903	612326038040	90147260912
141.5	706907009150	541847677595	741934112502	787658482367	309755573000	617620570923	87424597314
142.5	708726632520	537595950564	761053499255	777502558917	331561381085	623288004468	84412312613
143.5	710034150935	533310269316	780188816655	766637121578	356587525748	629351576846	81158188678
144.5	710800950297	528987837010	799150181209	755169008957	385042417849	635830079064	77732098644
145.5	710990561046	524628990016	817735309951	743199939247	417123396496	642735639351	74238386076
146.5	710559453630	520236935229	835731964805	730825460059	453002315951	650071225935	70831871464
147.5	709458307575	515817434286	852920995593	718134244051	492808117791	657827819859	67735651971
148.5	707633711878	511378446723	869079939933	705207693121	536606392919	665981236914	65254348399
149.5	705030236964	506929744525	883987106068	692119807598	584376215716	674488622174	63768913651
150.5	701592801212	502482510476	897426032760	678937273928	635984897755	683284703226	63693524046
151.5	697269239020	498048932117	909190190882	665719724229	691161754548	692277968159	65386286730
152.5	692012963364	493641802209	919087766690	652520123227	749472484126	701347027923	69043370799
153.5	685785605345	489274135271	926946349063	639385241792	810296280283	710337522351	74638187595
154.5	678559507484	484958808269	932617334278	626356181119	872808284049	719060023040	81939894365
155.5	670319947974	480708231906	935979863364	613468916995	935970332323	727289458512	90582099305
156.5	661066980542	476534057281	936944119421	600754839232	998533095427	734766618380	100130750901
157.5	650816789490	472446921074	935453835257	588241266853	1059052504810	741202263497	110126854927
158.5	639602481516	468456230935	931487894205	575951924865	1115922770749	746284260454	120107355049
159.5	627474264148	464569991398	925060947118	563907373131	1167427225021	749687960163	129615710483
160.5	614498993186	460794669572	916223013765	552125382047	1211806700711	751089751856	138210743388
161.5	600759106257	457135098917	905058084151	540621253213	1247343264601	750183361428	145477716241
162.5	586350993699	453594418761	891681781486	529408086128	1272455019671	746698059949	151042464073
163.5	571382888859	450174046751	876238190600	518496994199	1285795653065	740417554695	154587719863
164.5	555972385045	446873681146	858895990791	507897274906	1286350734707	731198013319	155869959255
165.5	540243703826	443691329757	839844058396	497616540077	1273521803430	718983487097	154734777801
166.5	524324848083	440623362355	819286720456	487660812768	1247189294056	703817007544	151128840243
167.5	508344772679	437664583494	797438846208	478034597436	1207746529652	685845865894	145106754910
168.5	492430696490	434808322906	774520958143	468740929906	1156099328035	665320047096	136831807967
169.5	476705663023	432046540835	750754530160	459781413225	1093629050385	642583439525	126570322586
170.5	461286434841	429369945967	726357618492	451156244866	1022120760931	618058201019	114680474227
171.5	446281781617	426768123853	701540943734	442864240063	943662039716	592223425796	101597737645
172.5	431791195123	424229673968	676504511646	434902855219	860521314883	565589910168	87820983018
173.5	417904038886	421742353761	651434828687	427268214604	775016836513	538673254490	73906218708
174.5	404699117236	419293228227	626502737448	419955142749	689388244661	511967694064	60480468636
175.5	392244629400	416868823668	601861868988	412957204310	605681972494	485922899772	48297078878
176.5	380598459691	414455284384	577647684876	406266752516	525659616996	460925559693	38349750564
177.5	369808745052	412038531119	553977062160	399874986826	450735280744	437286921180	31927954572
178.5	359914655902	409604420063	530948360160	393772019992	381944265350	415236744293	30042102232
179.5	350947324858	407138901220	508641898613	387946954380	319941948244	394923405463	32160456684
180.5	342930859696	404628174899	487120772220	382387967153	265028699574	376419294708	36479804728
181.5	335883380900	402058845018	466431926280	377082403715	217194642271	359730239637	41450649906
182.5	329818029562	399418067881	446607421229	372016878691	176177075923	344807494657	46231370585
183.5	324743897261	396693694959	427665819665	367177383590	141523430038	331560845102	50451799761
184.5	320666835338	393874408224	409613637139	362549400244	112653486694	319871553528	53986767995
185.5	317590106101	390949846504	392446806677	358118019019	88916029142	309604161488	56833373019
186.5	315514842684	387910721317	376152116271	353868060752	69636722995	300616492804	59048817568
187.5	314440287385	384748920693	360708587674	349784201290	54155648261	292767529061	60717708651
188.5	314363780504	381457599531	346088773465	345851097420	41854274914	285923105167	61934068745
189.5	315280473150	378031255140	332259957143	342053512946	32172700735	279959579823	62791298144
190.5	317182738838	374465786780	319185247853	338376443525	24618617570	274765766913	63376769506
191.5	320059260401	370758538176	306824567030	334805238870	18769773469	270243475589	63769236553
192.5	323893771920	366908322239	295135528842	331325720815	14271723651	266307013493	64037942266
193.5	328663440812	362915427476	284074219817	327924295711	10832498437	262881976451	64242682937
194.5	334336884257	358781605871	273595885493	324588059613	8215543599	259903595767	64434311350
195.5	340871827996	354510042349	263655533478	321304894709	6231976098	257314854926	64655322149
196.5	348212435490	350105306248	254208463036	318063555527	4732894953	255064531051	64940287580
197.5	356286362586	345573285595	245210731309	314853743529	3602222876	253105269179	65316016422
198.5	365001628012	340921105272	236619565735	311666168858	2750343097	251391762195	65801398944
199.5	374243433276	336157030492	228393731148	308492598189	2108639618	249879086544	66406977406
200.5	383871116013	331290357293	220493858645	305325887860	1624942748	248521232512	67134342715
201.5	393715476223	326331291970	212882741607	302160001726	1259816190	247269865543	67975499910
202.5	403576771157	321290821588	205525602430	298990013475	983587365	246073359203	68912364842
203.5	413223725620	316180577852	198390331669	295812093442	774009787	244876147674	69916551740
204.5	422393942064	311012696681	191447699427	292623480282	614447408	243618453173	70949590039
205.5	430796108715	305799675872	184671537224	289422438170	492480092	242236448015	71963675638
206.5	438114382787	300554233185	178038887148	286208200488	398842488	240662909219	72903024135
207.5	444015258383	295289167109	171530114097	282980901227	326622754	238828412714	73705856441
208.5	448157105475	290017222384	165128976302	279741495556	270661272	236663092198	74307012062
209.5	450202382735	284750962201	158822649256	276491671207	227101656	234098953411	74641150076
210.5	449832284933	279502648735	152601698595	273233752444	193056763	231072688294	74646459394
211.5	446763297107	274284133427	146459998430	269970598474	166360958	227528877679	74268755698
212.5	440764815468	269106758138	140394593117	266705498190	145386739	223423410331	73465792751
213.5	431676693609	263981268009	134405502255	263442063113	128909198	218726887237	72211563456
214.5	419425325267	258917736578	128495470923	260184120312	116005966	213427731809	70500315684
215.5	404036729806	253925503422	122669669430	256935607003	105983458	207534698624	68349963362
216.5	385645108882	249013124311	116935349210	253700468353	98322619	201078474675	65804534190
217.5	364495526033	244188333649	111301463584	250482559848	92639206	194112104464	62935253419
218.5	340939737899	239458018743	105778263952	247285555412	88654945	186710046190	59839801043
219.5	315424760682	234828205269	100376883264	244112862242	86176962	178965777684	56639179621
220.5	288474440937	230304053159	95108919344	240967543143	85083592	170988008035	53471504628
221.5	260665038771	225889862012	89986030742	237852246943	85315283	162895698750	50481993435
222.5	232596526359	221589085081	85019557167	234769147390	86869746	154812237149	47808790018
223.5	204861851908	217404350811	80220175345	231719890788	89800861	146859213943	45565490726
224.5	178016727586	213337490912	75597599398	228705552457	94221149	139150318300	43823521396
225.5	152552509332	209389573964	71160332654	225726602031	100307919	131785865180	42599878140
226.5	128874431001	205560943563	66915475376	222782877477	108313455	124848408174	41855823035
227.5	107286870130	201851260102	62868590360	219873567690	118579902	118399773637	41508270986
228.5	87986539250	198259545331	59023625907	216997203451	131559857	112479694759	41449765842
229.5	71063629408	194784228911	55382893400	214151656537	147844050	107106050461	41569594517
230.5	56510107479	191423196279	51947094821	211334146772	168197987	102276548668	41769858048
231.5	44233700604	188173837220	48715394019	208541256793	193609997	97971559727	41974137031
232.5	34075672338	185033094622	45685524522	205768954383	225353895	94157719952	42129619593
233.5	25830343697	181997512979	42853926078	203012622198	265070305	90791895051	42204925284
234.5	19264427821	179063286290	40215902021	200267094772	314871843	87825116549	42185809439
235.5	14134578022	176226305053	37765789792	197526702723	377478640	85206170846	42070318988
236.5	10202016879	173482202150	35497137556	194785324058	456392265	82884614582	41864326387
237.5	7243631058	170826397425	33402880672	192036442518	556117894	80813093913	41577881420
238.5	5059402670	168254140844	31475512773	189273212868	682446653	78948943162	41222504826
239.5	3476443351	165760554148	29707247266	186488533011	842812170	77255117989	40809364433
240.5	2350168927	163340670909	28090166158	183675122731	1046737668	75700573279	40348183291
241.5	1563293646	160989474963	26616354100	180825608819	1306391875	74260224681	39846698645
242.5	1023348375	158701937173	25278016516	177932616185	1637273576	72914638365	39310497549
243.5	659365115	156473050474	24067581445	174988864469	2059045102	71649581321	38743082351
244.5	418253866	154297863188	22977785424	171987269462	2596533911	70455541170	38146055223
245.5	261258993	152171510542	22001744232	168921048524	3280917765	69327296011	37519347556
246.5	160745592	150089244359	21133009731	165783828931	4151101880	68263586098	36861453348
247.5	97448674	148046460850	20365614260	162569757939	5255284547	67266913254	36169654705
248.5	58227392	146038726448	19694104214	159273613106	6652690005	66343472233	35440253477
249.5	34304533	144061801600	19113564470	155890911216	8415422412	65503200846	34668848504
250.5	19935133	142111662431	18619635310	152418013988	10630361953	64759921763	33850726776
251.5	11431759	140184520206	18208523391	148852228551	13400983055	64131537392	32981473595
252.5	6471843	138276838480	17877008214	145191900560	16848926100	63640229039	32057956939
253.5	3618847	136385347865	17622445363	141436497744	21115100177	63312601999	31079910067
254.5	1999665	134507058326	17442767635	137586681624	26360039204	63179709291	30052426843
255.5	1092490	132639268944	17336484979	133644365195	32763183469	63276879015	28989786847
256.5	590460	130779575086	17302683994	129612754466	40520721650	63643265131	27921093419
257.5	315882	128925872959	17341027543	125496371903	49841615401	64321040737	26898082212
258.5	167371	127076361518	17451754842	121301060122	60941451352	65354159041	26004752031
259.5	87887	125229541773	17635682213	117033964466	74033836040	66786622476	25366462533
260.5	45766	123384213503	17894204500	112703493540	89319177929	68660227048	25152262132
261.5	23649	121539469482	18229296944	108319257232	106970893290	71011788119	25560333672
262.5	12135	119694687289	18643517164	103891982278	127119328471	73869905467	26780078306
263.5	6187	117849518857	19140006630	99433406006	149833999588	77251387454	28942351575
264.5	3137	116003877906	19722490889	94956149450	175105090529	81157522382	32087086334
265.5	1583	114157925450	20395277529	90473571659	202825488218	85570452888	36166374639
266.5	795	112312053584	21163250701	85999607552	232774926829	90449967892	41070668464
267.5	398	110466867783	22031860751	81548592227	264608010148	95731066261	46654966754
268.5	199	108623167949	23007107346	77135075070	297847933024	101322656717	52754206844
269.5	99	106781928466	24095514203	72773627402	331887585590	107107731152	59189532015
270.5	49	104944277531	25304093364	68478647673	365999370802	112945277884	65770542099
271.5	25	103111475999	26640296753	64264168354	399354494092	118674087045	72297262224
272.5	12	101284896036	28111952617	60143668724	431051721436	124118447765	78563609294
273.5	6	99465999805	29727184338	56129897629	460154708845	129095558125	84362846221
274.5	3	97656318431	31494309084	52234710062	485736071594	133424281835	89494818091
275.5	2	95857431487	33421713844	48468921055	506925494905	136934712259	93774403414
276.5	0	94070947180	35517706534	44842179897	522958505631	139477867849	97040427707
277.5	0	92298483441	37790340212	41362867117	533222132529	140934764660	99164209724
278.5	0	90541650073	40247208891	38038016050	537293658944	141224106791	100056922082
279.5	0	88802032090	42895214089	34873260095	534969051334	140307911522	99675042080
280.5	0	87081174362	45740302122	31872806065	526278413185	138194539147	98023338259
281.5	0	85380567645	48787173169	29039433322	511486896238	134938814075	95155069647
282.5	0	83701636054	52038964429	26374517719	491080783388	130639180318	91169345595
283.5	0	82045726018	55496911117	23878078715	465739792820	125432101734	86205877071
284.5	0	80414096713	59159990679	21548847541	436297884115	119484163810	80437615875
285.5	0	78807911983	63024557370	19384353769	403695829852	112982530595	74062000019
286.5	0	77228233691	67083976165	17381027349	368929440483	106124535537	67291681094
287.5	0	75676016475	71328266784	15534312910	332997534947	99107226223	60345688670
288.5	0	74152103827	75743770384	13838793014	296853529867	92117639419	53441971418
289.5	0	72657225438	80312852983	12288317044	261363926392	85324464372	46792098914
290.5	0	71191995700	85013660916	10876132498	227276099867	78871577796	40598466537
291.5	0	69756913296	89819944393	9595015670	195196765716	72873727815	35053238086
292.5	0	68352361767	94700965463	8437398954	165581435752	67414432387	30335780289
293.5	0	66978610956	99621506197	7395492346	138734212915	62545964483	26601189445
294.5	0	65635819234	104541991673	6461397102	114816493710	58291140344	23950344942
295.5	0	64324036406	109418740223	5627209915	93862615933	54646520495	22383797177
296.5	0	63043207197	114204350441	4885116371	75800225521	51586579906	21772393130
297.5	0	61793175226	118848230556	4227472898	60473126199	49068400976	21885644905
298.5	0	60573687393	123297271112	3646876751	47664576787	47036482409	22466026430
299.5	0	59384398573	127496656517	3136223980	37119353769	45427326568	23293106863
300.5	0	58224876570	131390805146	2688755627	28563334959	44173554460	24207704219
301.5	0	57094607243	134924421516	2298092652	21719820797	43207388442	25106805316
302.5	0	55992999756	138043637879	1958260346	16322240847	42463427766	25928554551
303.5	0	54919391898	140697216776	1663703108	12123257132	41880713783	26637958585
304.5	0	53873055427	142837780896	1409290613	8900551943	41404135776	27216384202
305.5	0	52853201405	144423032399	1190316468	6459769711	40985263996	27654709671
306.5	0	51858985486	145416921078	1002490461	4635176241	40582714653	27949187389
307.5	0	50889513154	145790719390	841925509	3288618280	40162155267	28099116249
308.5	0	49943844863	145523963025	705120385	2307330332	39696051721	28105648730
309.5	0	49021001108	144605218088	588939209	1601063203	39163244322	27971270414
310.5	0	48119967384	143032640434	490588636	1098917432	38548422777	27699649180
311.5	0	47239699059	140814298926	407593551	746169026	37841552112	27295662218
312.5	0	46379126152	137968242319	337771998	501285121	37037285118	26765483522
313.5	0	45537158024	134522298680	279209962	333249818	36134383297	26116663584
314.5	0	44712687992	130513606397	230236491	219258685	35135157913	25358164758
315.5	0	43904597880	125987886372	189399598	142794652	34044935700	24500335973
316.5	0	43111762512	120998475450	155443235	92067007	32871549641	23554823167
317.5	0	42333054168	115605150881	127285589	58776534	31624853434	22534419526
318.5	0	41567347008	109872784208	103998849	37160792	30316258171	21452864256
319.5	0	40813521485	103869869900	84790540	23271393	28958290664	20324601041
320.5	0	40070468748	97666978899	68986472	14437565	27564174337	19164508429
321.5	0	39337095050	91335189845	56015288	8875230	26147435083	17987614295
322.5	0	38612326173	84944550854	45394590	5407065	24721535736	16808805574
323.5	0	37895111855	78562622421	36718550	3265310	23299543627	15642542691
324.5	0	37184430250	72253147437	29646958	1955037	21893835936	14502585615
325.5	0	36479292381	66074887748	23895571	1160760	20515847292	13401735308
326.5	0	35778746613	60080658502	19227681	683562	19175863272	12351590878
327.5	0	35081883118	54316582271	15446794	399352	17882862307	11362319415
328.5	0	34387838309	48821575049	12390291	231511	16644407032	10442433481
329.5	0	33695799246	43627066350	9923987	133206	15466584558	9598572066
330.5	0	33005007964	38756946174	7937470	76087	14353993539	8835286747
331.5	0	32314765713	34227723145	6340141	43156	13309774431	8154847264
332.5	0	31624437061	30048870973	5057854	24312	12335678040	7557099074
333.5	0	30933453833	26223334816	4030080	13606	11432166467	7039423700
334.5	0	30241318839	22748165355	3207526	7567	10598539857	6596859734
335.5	0	29547609347	19615246416	2550145	4183	9833082018	6222425599
336.5	0	28851980252	16812081777	2025474	2299	9133217960	5907641283
337.5	0	28154166894	14322608149	1607252	1257	8495676710	5643188843
338.5	0	27453987465	12128004108	1274279	683	7916653307	5419607528
339.5	0	26751344974	10207468509	1009477	370	7391964666	5227911458
340.5	0	26046228694	8538946506	799111	199	6917194902	5060047977
341.5	0	25338715056	7099786258	632154	107	6487826715	4909164739
342.5	0	24628967954	5867314450	499771	57	6099356446	4769699657
343.5	0	23917238390	4819323708	394890	30	5747391404	4637335623
344.5	0	23203863455	3934469436	311864	16	5427728954	4508869709
345.5	0	22489264597	3192577576	246185	8	5136417673	4382040856
346.5	0	21773945157	2574867991	194263	4	4869801483	4255348402
347.5	0	21058487159	2064100701	153241	2	4624548221	4127881793
348.5	0	20343547358	1644653926	120847	1	4397664426	3999172062
349.5	0	19629852537	1302543919	95280	0	4186498347	3869068940
350.5	0	18918194086	1025396995	75108	0	3988733238	3737643257
351.5	0	18209421879	802384000	59199	0	3802373016	3605112082
352.5	0	17504437495	624126887	46656	0	3625722208	3471783106
353.5	0	16804186836	482586201	36769	0	3457361961	3338014575
354.5	0	16109652204	370937158	28977	0	3296123668	3204187357
355.5	0	15421843905	283440790	22838	0	3141061507	3070686171
356.5	0	14741791476	215315416	18001	0	2991424979	2937887503
357.5	0	14070534618	162612492	14190	0	2846632260	2806152269
358.5	0	13409113941	122099801	11187	0	2706244986	2675821700
359.5	0	12758561623	91153960	8822	0	2569944881	2547215345
360.5	0	12119892105	67663414	6958	0	2437512495	2420630364
361.5	0	11494092919	49942383	5490	0	2308808158	2296341555
362.5	0	10882115784	36655717	4332	0	2183755167	2174601739
363.5	0	10284868064	26754222	3420	0	2062325141	2055642259
364.5	2	9703204706	19419721	2701	0	1944525426	1939673465
365.5	3	9137920765	14018981	2133	0	1830388376	1826885114
366.5	5	8589744605	10065521	1686	0	1719962363	1717446666
367.5	8	8059331858	7188309	1333	0	1613304302	1611507490
368.5	14	7547260228	5106379	1054	0	1510473535	1509196997
369.5	25	7054025191	3608451	834	0	1411526900	1410624746
370.5	42	6580036635	2536744	660	0	1316514816	1315880546
371.5	72	6125616488	1774220	523	0	1225478261	1225034605
372.5	124	5690997331	1234643	414	0	1138446502	1138137732
373.5	212	5276322004	854882	328	0	1055435485	1055221643
374.5	363	4881644195	589021	261	0	976446768	976299364
375.5	618	4506929977	403872	207	0	901466935	901365764
376.5	1050	4152060234	275598	164	0	830467409	830398208
377.5	1778	3816833950	187179	130	0	763404607	763357336
378.5	3000	3500972249	126537	104	0	700220378	700187968
379.5	5043	3204123141	85151	82	0	640842684	640820115
380.5	8445	2925866865	57043	66	0	585186484	585170095
381.5	14082	2665721731	38044	52	0	533154782	533141737
382.5	23375	2423150376	25262	42	0	484639811	484627641
383.5	38614	2197566316	16703	33	0	439524333	439510496
384.5	63466	1988340699	10997	26	0	397683038	397664416
385.5	103761	1794809156	7210	21	0	358984030	358956282
386.5	168700	1616278645	4708	17	0	323290414	323247059
387.5	272695	1452034216	3062	13	0	290461997	290393059
388.5	438148	1301345580	1984	11	0	260357145	260247123
389.5	699593	1163473438	1280	9	0	232834864	232659683
390.5	1109823	1037675472	823	7	0	207757225	207479673
391.5	1748840	923211964	527	5	0	184992267	184555235
392.5	2736795	819350977	336	4	0	164417623	163734196
393.5	4252450	725373068	214	4	0	145925147	144864321
394.5	6559221	640575506	136	3	0	129426973	127793446
395.5	10041419	564275977	86	2	0	114863497	112369946
396.5	15253986	495815765	54	2	0	102213961	98444778
397.5	22989780	434562421	34	1	0	91510447	85878466
398.5	34369185	379911918	21	1	0	82856225	74561564
399.5	50957539	331290319	13	0	0	76449574	64469861
400.5	74916283	288154977	8	0	0	72614254	55803938
401.5	109193880	249995299	5	0	0	71837837	49303944
402.5	157761975	216333106	3	0	0	74819017	46743677
403.5	225900854	186722626	2	0	0	82524696	50914098
404.5	320535638	160750161	1	0	0	96257160	64131313
405.5	450620474	138033460	0	0	0	117730787	87409770
406.5	627562095	118220855	0	0	0	149156590	121772721
407.5	865666245	100990180	0	0	0	193331285	169217631
408.5	1182580763	86047521	0	0	0	253725657	232810856
409.5	1599697812	73125840	0	0	0	334564730	316600117
410.5	2142465600	61983497	0	0	0	440889819	425563253
411.5	2840548052	52402697	0	0	0	578590150	565580519
412.5	3727760813	44187916	0	0	0	754389746	743392017
413.5	4841705773	37164296	0	0	0	975774014	966509735
414.5	6223026116	31176063	0	0	0	1250840436	1243061081
415.5	7914212213	26084971	0	0	0	1588059437	1581546261
416.5	9957907388	21768782	0	0	0	1995935234	1990497502
417.5	12394693109	18119817	0	0	0	2482562585	2478035115
418.5	15260375687	15043570	0	0	0	3055083851	3051324350
419.5	18582849734	12457393	0	0	0	3719061425	3715947860
420.5	22378674222	10289268	0	0	0	4477792698	4475220824
421.5	26649559841	8476667	0	0	0	5331607302	5329488388
422.5	31379024464	6965487	0	0	0	6277197990	6275456763
423.5	36529518774	5709082	0	0	0	7307045571	7305618384
424.5	42040347877	4667372	0	0	0	8409003050	8407836255
425.5	47826709340	3806037	0	0	0	9566103075	9565151594
426.5	53780127893	3095790	0	0	0	10756644736	10755870806
427.5	59770489858	2511720	0	0	0	11954600316	11953972395
428.5	65649768503	2032713	0	0	0	13130360243	13129852071
429.5	71257392095	1640931	0	0	0	14251806605	14251396376
430.5	76427051519	1321350	0	0	0	15285674574	15285344238
431.5	80994589754	1061361	0	0	0	16199130223	16198864884
432.5	84806479188	850415	0	0	0	16961465921	16961253318
433.5	87728292684	679714	0	0	0	17545794479	17545624552
434.5	89652525516	541943	0	0	0	17930613492	17930478006
435.5	90505137936	431041	0	0	0	18101113795	18101006035
436.5	90250265272	342000	0	0	0	18050121454	18050035954
437.5	88892679255	270697	0	0	0	17778589990	17778522316
438.5	86477767957	213744	0	0	0	17295596340	17295542904
439.5	83089013406	168371	0	0	0	16617836355	16617794263
440.5	78843162257	132314	0	0	0	15768658914	15768625836
441.5	73883481957	103733	0	0	0	14776717138	14776691205
442.5	68371650752	81135	0	0	0	13674346377	13674326094
443.5	62478928185	63312	0	0	0	12495798299	12495782471
444.5	56377284389	49290	0	0	0	11275466736	11275454413
445.5	50231130816	38285	0	0	0	10046233820	10046224249
446.5	44190199677	29669	0	0	0	8838045869	8838038452
447.5	38383978595	22940	0	0	0	7676800307	7676794572
448.5	32917939576	17698	0	0	0	6583591455	6583587030
449.5	27871627721	13623	0	0	0	5574328269	5574324863
450.5	23298514295	10463	0	0	0	4659704952	4659702336
451.5	19227386432	8018	0	0	0	3845478890	3845476886
452.5	15664952239	6132	0	0	0	3132991674	3132990141
453.5	12599289891	4679	0	0	0	2519858914	2519857744
454.5	10003761229	3563	0	0	0	2000752958	2000752068
455.5	7841038568	2707	0	0	0	1568208255	1568207578
456.5	6066948728	2052	0	0	0	1213390156	1213389643
457.5	4633910205	1553	0	0	0	926782352	926781963
458.5	3493817282	1173	0	0	0	698763691	698763398
459.5	2600299689	884	0	0	0	520060114	520059894
460.5	1910351232	665	0	0	0	382070379	382070213
461.5	1385371349	499	0	0	0	277074370	277074245
462.5	991698091	374	0	0	0	198339693	198339600
463.5	700730064	279	0	0	0	140146069	140145999
464.5	488740438	208	0	0	0	97748129	97748077
465.5	336481225	155	0	0	0	67296276	67296237
466.5	228663977	115	0	0	0	45732819	45732790
467.5	153387104	86	0	0	0	30677438	30677416
468.5	101562747	63	0	0	0	20312562	20312546
469.5	66379708	47	0	0	0	13275951	13275939
470.5	42824551	35	0	0	0	8564917	8564909
471.5	27271475	26	0	0	0	5454300	5454294
472.5	17142926	19	0	0	0	3428589	3428584
473.5	10637129	14	0	0	0	2127428	2127425
474.5	6515234	10	0	0	0	1303049	1303046
475.5	3939176	7	0	0	0	787837	787835
476.5	2351008	5	0	0	0	470203	470201
477.5	1385099	4	0	0	0	277021	277020
478.5	805545	3	0	0	0	161110	161109
479.5	462473	2	0	0	0	92495	92494
480.5	262105	2	0	0	0	52421	52421
481.5	146643	1	0	0	0	29329	29329
482.5	80994	0	0	0	0	16199	16199
483.5	44163	0	0	0	0	8833	8833
484.5	23773	0	0	0	0	4755	4755
485.5	12634	0	0	0	0	2527	2527
486.5	6628	0	0	0	0	1326	1326
487.5	3433	0	0	0	0	687	687
488.5	1756	0	0	0	0	351	351
489.5	887	0	0	0	0	177	177
490.5	442	0	0	0	0	88	88
491.5	218	0	0	0	0	44	44
492.5	106	0	0	0	0	21	21
493.5	51	0	0	0	0	10	10
494.5	24	0	0	0	0	5	5
495.5	11	0	0	0	0	2	2
496.5	5	0	0	0	0	1	1
497.5	2	0	0	0	0	0	0
498.5	1	0	0	0	0	0	0
499.5	0	0	0	0	0	0	0
500.5	0	0	0	0	0	0	0
501.5	0	0	0	0	0	0	0
502.5	0	0	0	0	0	0	0
503.5	0	0	0	0	0	0	0
504.5	0	0	0	0	0	0	0
505.5	0	0	0	0	0	0	0
506.5	0	0	0	0	0	0	0
507.5	0	0	0	0	0	0	0
508.5	0	0	0	0	0	0	0
509.5	0	0	0	0	0	0	0
510.5	0	0	0	0	0	0	0
511.5	0	0	0	0	0	0	0
512.5	0	0	0	0	0	0	0
513.5	0	0	0	0	0	0	0
514.5	0	0	0	0	0	0	0
515.5	0	0	0	0	0	0	0
516.5	0	0	0	0	0	0	0
517.5	0	0	0	0	0	0	0
518.5	0	0	0	0	0	0	0
519.5	0	0	0	0	0	0	0
520.5	0	0	0	0	0	0	0
521.5	0	0	0	0	0	0	0
522.5	0	0	0	0	0	0	0
523.5	0	0	0	0	0	0	0
524.5	0	0	0	0	0	0	0
525.5	0	0	0	0	0	0	0
526.5	0	0	0	0	0	0	0
527.5	0	0	0	0	0	0	0
528.5	0	0	0	0	0	0	0
529.5	0	0	0	0	0	0	0
530.5	0	0	0	0	0	0	0
531.5	0	0	0	0	0	0	0
532.5	0	0	0	0	0	0	0
533.5	0	0	0	0	0	0	0
534.5	0	0	0	0	0	0	0
535.5	0	0	0	0	0	0	0
536.5	0	0	0	0	0	0	0
537.5	0	0	0	0	0	0	0
538.5	0	0	0	0	0	0	0
539.5	0	0	0	0	0	0	0
540.5	0	0	0	0	0	0	0
541.5	0	0	0	0	0	0	0
542.5	0	0	0	0	0	0	0
543.5	0	0	0	0	0	0	0
544.5	0	0	0	0	0	0	0
545.5	0	0	0	0	0	0	0
546.5	0	0	0	0	0	0	0
547.5	0	0	0	0	0	0	0
548.5	0	0	0	0	0	0	0
549.5	0	0	0	0	0	0	0
550.5	0	0	0	0	0	0	0
551.5	0	0	0	0	0	0	0
552.5	0	0	0	0	0	0	0
553.5	0	0	0	0	0	0	0
554.5	0	0	0	0	0	0	0
555.5	0	0	0	0	0	0	0
556.5	0	0	0	0	0	0	0
557.5	0	0	0	0	0	0	0
558.5	0	0	0	0	0	0	0
559.5	0	0	0	0	0	0	0
560.5	0	0	0	0	0	0	0
561.5	0	0	0	0	0	0	0
562.5	0	0	0	0	0	0	0
563.5	0	0	0	0	0	0	0
564.5	0	0	0	0	0	0	0
565.5	0	0	0	0	0	0	0
566.5	0	0	0	0	0	0	0
567.5	0	0	0	0	0	0	0
568.5	0	0	0	0	0	0	0
569.5	0	0	0	0	0	0	0
570.5	0	0	0	0	0	0	0
571.5	0	0	0	0	0	0	0
572.5	0	0	0	0	0	0	0
573.5	0	0	0	0	0	0	0
574.5	0	0	0	0	0	0	0
575.5	0	0	0	0	0	0	0
576.5	0	0	0	0	0	0	0
577.5	0	0	0	0	0	0	0
578.5	0	0	0	0	0	0	0
579.5	0	0	0	0	0	0	0
580.5	0	0	0	0	0	0	0
581.5	0	0	0	0	0	0	0
582.5	0	0	0	0	0	0	0
583.5	0	0	0	0	0	0	0
584.5	0	0	0	0	0	0	0
585.5	0	0	0	0	0	0	0
586.5	0	0	0	0	0	0	0
587.5	0	0	0	0	0	0	0
588.5	0	0	0	0	0	0	0
589.5	0	0	0	0	0	0	0
590.5	0	0	0	0	0	0	0
591.5	0	0	0	0	0	0	0
592.5	0	0	0	0	0	0	0
593.5	0	0	0	0	0	0	0
594.5	0	0	0	0	0	0	0
595.5	0	0	0	0	0	0	0
596.5	0	0	0	0	0	0	0
597.5	0	0	0	0	0	0	0
598.5	0	0	0	0	0	0	0
599.5	0	0	0	0	0	0	0
600.5	0	0	0	0	0	0	0
601.5	0	0	0	0	0	0	0
602.5	0	0	0	0	0	0	0
603.5	0	0	0	0	0	0	0
604.5	0	0	0	0	0	0	0
605.5	0	0	0	0	0	0	0
606.5	0	0	0	0	0	0	0
607.5	0	0	0	0	0	0	0
608.5	0	0	0	0	0	0	0
609.5	0	0	0	0	0	0	0
610.5	0	0	0	0	0	0	0
611.5	0	0	0	0	0	0	0
612.5	0	0	0	0	0	0	0
613.5	0	0	0	0	0	0	0
614.5	0	0	0	0	0	0	0
615.5	0	0	0	0	0	0	0
616.5	0	0	0	0	0	0	0
617.5	0	0	0	0	0	0	0
618.5	0	0	0	0	0	0	0
619.5	0	0	0	0	0	0	0
620.5	0	0	0	0	0	0	0
621.5	0	0	0	0	0	0	0
622.5	0	0	0	0	0	0	0
623.5	0	0	0	0	0	0	0
624.5	0	0	0	0	0	0	0
625.5	0	0	0	0	0	0	0
626.5	0	0	0	0	0	0	0
627.5	0	0	0	0	0	0	0
628.5	0	0	0	0	0	0	0
629.5	0	0	0	0	0	0	0
630.5	0	0	0	0	0	0	0
631.5	0	0	0	0	0	0	0
632.5	0	0	0	0	0	0	0
633.5	0	0	0	0	0	0	0
634.5	0	0	0	0	0	0	0
635.5	0	0	0	0	0	0	0
636.5	0	0	0	0	0	0	0
637.5	0	0	0	0	0	0	0
638.5	0	0	0	0	0	0	0
639.5	0	0	0	0	0	0	0
640.5	0	0	0	0	0	0	0
641.5	0	0	0	0	0	0	0
642.5	0	0	0	0	0	0	0
643.5	0	0	0	0	0	0	0
644.5	0	0	0	0	0	0	0
645.5	0	0	0	0	0	0	0
646.5	0	0	0	0	0	0	0
647.5	0	0	0	0	0	0	0
648.5	0	0	0	0	0	0	0
649.5	0	0	0	0	0	0	0
650.5	0	0	0	0	0	0	0
651.5	0	0	0	0	0	0	0
652.5	0	0	0	0	0	0	0
653.5	0	0	0	0	0	0	0
654.5	0	0	0	0	0	0	0
655.5	0	0	0	0	0	0	0
656.5	0	0	0	0	0	0	0
657.5	0	0	0	0	0	0	0
658.5	0	0	0	0	0	0	0
659.5	0	0	0	0	0	0	0
660.5	0	0	0	0	0	0	0
661.5	0	0	0	0	0	0	0
662.5	0	0	0	0	0	0	0
663.5	0	0	0	0	0	0	0
664.5	0	0	0	0	0	0	0
665.5	0	0	0	0	0	0	0
666.5	0	0	0	0	0	0	0
667.5	0	0	0	0	0	0	0
668.5	0	0	0	0	0	0	0
669.5	0	0	0	0	0	0	0
670.5	0	0	0	0	0	0	0
671.5	0	0	0	0	0	0	0
672.5	0	0	0	0	0	0	0
673.5	0	0	0	0	0	0	0
674.5	0	0	0	0	0	0	0
675.5	0	0	0	0	0	0	0
676.5	0	0	0	0	0	0	0
677.5	0	0	0	0	0	0	0
678.5	0	0	0	0	0	0	0
679.5	0	0	0	0	0	0	0
680.5	0	0	0	0	0	0	0
681.5	0	0	0	0	0	0	0
682.5	0	0	0	0	0	0	0
683.5	0	0	0	0	0	0	0
684.5	0	0	0	0	0	0	0
685.5	0	0	0	0	0	0	0
686.5	0	0	0	0	0	0	0
687.5	0	0	0	0	0	0	0
688.5	0	0	0	0	0	0	0
689.5	0	0	0	0	0	0	0
690.5	0	0	0	0	0	0	0
691.5	0	0	0	0	0	0	0
692.5	0	0	0	0	0	0	0
693.5	0	0	0	0	0	0	0
694.5	0	0	0	0	0	0	0
695.5	0	0	0	0	0	0	0
696.5	0	0	0	0	0	0	0
697.5	0	0	0	0	0	0	0
698.5	0	0	0	0	0	0	0
699.5	0	0	0	0	0	0	0
700.5	0	0	0	0	0	0	0
701.5	0	0	0	0	0	0	0
702.5	0	0	0	0	0	0	0
703.5	0	0	0	0	0	0	0
704.5	0	0	0	0	0	0	0
705.5	0	0	0	0	0	0	0
706.5	0	0	0	0	0	0	0
707.5	0	0	0	0	0	0	0
708.5	0	0	0	0	0	0	0
709.5	0	0	0	0	0	0	0
710.5	0	0	0	0	0	0	0
711.5	0	0	0	0	0	0	0
712.5	0	0	0	0	0	0	0
713.5	0	0	0	0	0	0	0
714.5	0	0	0	0	0	0	0
715.5	0	0	0	0	0	0	0
716.5	0	0	0	0	0	0	0
717.5	0	0	0	0	0	0	0
718.5	0	0	0	0	0	0	0
719.5	0	0	0	0	0	0	0
720.5	0	0	0	0	0	0	0
721.5	0	0	0	0	0	0	0
722.5	0	0	0	0	0	0	0
723.5	0	0	0	0	0	0	0
724.5	0	0	0	0	0	0	0
725.5	0	0	0	0	0	0	0
726.5	0	0	0	0	0	0	0
727.5	0	0	0	0	0	0	0
728.5	0	0	0	0	0	0	0
729.5	0	0	0	0	0	0	0
730.5	0	0	0	0	0	0	0
731.5	0	0	0	0	0	0	0
732.5	0	0	0	0	0	0	0
733.5	0	0	0	0	0	0	0
734.5	0	0	0	0	0	0	0
735.5	0	0	0	0	0	0	0
736.5	0	0	0	0	0	0	0
737.5	0	0	0	0	0	0	0
738.5	0	0	0	0	0	0	0
739.5	0	0	0	0	0	0	0
740.5	0	0	0	0	0	0	0
741.5	0	0	0	0	0	0	0
742.5	0	0	0	0	0	0	0
743.5	0	0	0	0	0	0	0
744.5	0	0	0	0	0	0	0
745.5	0	0	0	0	0	0	0
746.5	0	0	0	0	0	0	0
747.5	0	0	0	0	0	0	0
748.5	0	0	0	0	0	0	0
749.5	0	0	0	0	0	0	0
750.5	0	0	0	0	0	0	0
751.5	0	0	0	0	0	0	0
752.5	0	0	0	0	0	0	0
753.5	0	0	0	0	0	0	0
754.5	0	0	0	0	0	0	0
755.5	0	0	0	0	0	0	0
756.5	0	0	0	0	0	0	0
757.5	0	0	0	0	0	0	0
758.5	0	0	0	0	0	0	0
759.5	0	0	0	0	0	0	0
760.5	0	0	0	0	0	0	0
761.5	0	0	0	0	0	0	0
762.5	0	0	0	0	0	0	0
763.5	0	0	0	0	0	0	0
764.5	0	0	0	0	0	0	0
765.5	0	0	0	0	0	0	0
766.5	0	0	0	0	0	0	0
767.5	0	0	0	0	0	0	0
768.5	0	0	0	0	0	0	0
769.5	0	0	0	0	0	0	0
770.5	0	0	0	0	0	0	0
771.5	0	0	0	0	0	0	0
772.5	0	0	0	0	0	0	0
773.5	0	0	0	0	0	0	0
774.5	0	0	0	0	0	0	0
775.5	0	0	0	0	0	0	0
776.5	0	0	0	0	0	0	0
777.5	0	0	0	0	0	0	0
778.5	0	0	0	0	0	0	0
779.5	0	0	0	0	0	0	0
780.5	0	0	0	0	0	0	0
781.5	0	0	0	0	0	0	0
782.5	0	0	0	0	0	0	0
783.5	0	0	0	0	0	0	0
784.5	0	0	0	0	0	0	0
785.5	0	0	0	0	0	0	0
786.5	0	0	0	0	0	0	0
787.5	0	0	0	0	0	0	0
788.5	0	0	0	0	0	0	0
789.5	0	0	0	0	0	0	0
790.5	0	0	0	0	0	0	0
791.5	0	0	0	0	0	0	0
792.5	0	0	0	0	0	0	0
793.5	0	0	0	0	0	0	0
794.5	0	0	0	0	0	0	0
795.5	0	0	0	0	0	0	0
796.5	0	0	0	0	0	0	0
797.5	0	0	0	0	0	0	0
798.5	0	0	0	0	0	0	0
799.5	0	0	0	0	0	0	0
800.5	0	0	0	0	0	0	0
801.5	0	0	0	0	0	0	0
802.5	0	0	0	0	0	0	0
803.5	0	0	0	0	0	0	0
804.5	0	0	0	0	0	0	0
805.5	0	0	0	0	0	0	0
806.5	0	0	0	0	0	0	0
807.5	0	0	0	0	0	0	0
808.5	0	0	0	0	0	0	0
809.5	0	0	0	0	0	0	0
810.5	0	0	0	0	0	0	0
811.5	0	0	0	0	0	0	0
812.5	0	0	0	0	0	0	0
813.5	0	0	0	0	0	0	0
[truncated: 4,742 more rows]

## Sheet: NTA 3
NTA Experiment Summary File
Created with NTA 3.3 Dev Build 3.3.301
[Experiment Details]
Software Version	NTA 3.3 Dev Build 3.3.301
Experiment Name	Capture 2019-07-24 13-36-27.nano
Operator Name	Mel
Time Captured	13:36:27 24/07/2019
Sample Description	12 4-6 450 7/24/19
Pre-treatment
Diluent	PBS
Remarks
Filename:	Capture 2019-07-24 13-36-52	Capture 2019-07-24 13-37-27	Capture 2019-07-24 13-38-02	Capture 2019-07-24 13-38-37	Capture 2019-07-24 13-39-12
[Conditions]
Temperature/C	24.997	24.993	24.993	24.996	24.986
Viscosity/cP	0.888753	0.888834	0.888834	0.888773	0.888976
Camera Type	sCMOS	sCMOS	sCMOS	sCMOS	sCMOS
Laser Type	Blue488	Blue488	Blue488	Blue488	Blue488
Camera Level	13	13	13	13	13
Slider Shutter	1232	1232	1232	1232	1232
Slider Gain	219	219	219	219	219
Shutter/ms	30.8	30.8	30.8	30.8	30.8
Camera Histogram Upper Limit	8235	8235	8235	8235	8235
Camera Histogram Lower Limit	0	0	0	0	0
Frame rate/fps	24.9825	24.9825	24.9825	24.9825	24.9825
Syringe Pump Speed/AU	80	80	80	80	80
[Settings]
Detection Threshold	3	3	3	3	3
Max Jump Mode	Auto	Auto	Auto	Auto	Auto
Max Jump Distance	17.136	13.9297	14.6943	14.2468	14.2483
Blur	Auto	Auto	Auto	Auto	Auto
Min Track Length	Auto	Auto	Auto	Auto	Auto
First frame	0	0	0	0	0
Total frames analysed	749	749	749	749	749
[Exclusion Regions]
No Exclusion Regions Used
[Results]						Average	Standard Error
Dilution factor (concentrations adjusted for this factor)	Not recorded	Not recorded	Not recorded	Not recorded	Not recorded
Concentration (Particles / ml)	429000000	528000000	633000000	599000000	583000000	554000000	35700000
Particles per frame	21.8	26.8	32.1	30.4	29.6	28.1	1.8
Centres per frame	23.1	33	44.9	36.9	39.1	35.4	3.6
Completed tracks	1409	2007	3212	2196	2393
X-Drift (pix/frame)	-9.8	-9.5	-9.6	-9.6	-9.6
Y-Drift (pix/frame)	0.4	0.4	0.4	0.4	0.4
[Information]
Completed Tracks	OK	OK	OK	OK	OK
Concentration	OK	OK	OK	OK	OK
Video length	OK	OK	OK	OK	OK
Noise level	No	Noise detected	Noise detected	Noise detected	Noise detected
Vibration detected	Moderate vibration	Moderate vibration	Moderate vibration	Minor vibration	Moderate vibration
Vibration correction applied	Yes	Yes	Yes	Yes	Yes
Settings changed?	No	No	No	No	No
Errors (1)
Errors (2)
[Data Included]
Size distribution - Number weighting - With Percentiles
Size distribution - Surface area weighting - With Percentiles
Size distribution - Volume weighting - With Percentiles
Diffusion distribution - Number weighting - With Percentiles
Diffusion distribution - Surface area weighting - With Percentiles
Diffusion distribution - Volume weighting - With Percentiles
[Size Data]
Analysis Method	FTLA
Weighting	Number
Filename	Capture 2019-07-24 13-36-52	Capture 2019-07-24 13-37-27	Capture 2019-07-24 13-38-02	Capture 2019-07-24 13-38-37	Capture 2019-07-24 13-39-12	Average	Standard Error
Mean	127.3	141.5	133.6	145.4	147.3	139	3.8
Mode	85.3	106	98.5	101.5	105.7	99.4	3.8
SD	47.4	56.3	57.3	63.1	61.9	57.2	2.8
D10	77.9	85	79.4	86.5	90.2	83.8	2.3
D50	118.2	127.5	120.4	127.9	131.5	125.1	2.5
D90	189.3	202.2	203.6	216.3	233.4	209	7.5
Valid Tracks	616	732	901	854	809
Graph Data
Bin centre (nm)	Concentration (particles / ml)	Concentration (particles / ml)	Concentration (particles / ml)	Concentration (particles / ml)	Concentration (particles / ml)	Concentration average	Standard Error
0.5	0	0	0	0	0	0	0
1.5	0	0	0	0	0	0	0
2.5	0	0	0	0	0	0	0
3.5	0	0	0	0	0	0	0
4.5	0	0	0	0	0	0	0
5.5	0	0	0	0	0	0	0
6.5	0	0	0	0	0	0	0
7.5	0	0	0	0	0	0	0
8.5	0	0	0	0	0	0	0
9.5	0	0	0	0	0	0	0
10.5	0	0	0	0	0	0	0
11.5	0	0	0	0	0	0	0
12.5	0	0	0	0	0	0	0
13.5	0	0	0	0	1	0	0
14.5	0	0	0	0	10	2	2
15.5	0	0	0	0	50	10	10
16.5	0	0	0	0	212	42	42
17.5	0	0	0	0	723	145	145
18.5	0	0	0	0	2045	409	409
19.5	0	0	0	0	4880	976	976
20.5	0	0	0	0	9991	1998	1998
21.5	0	0	0	0	17819	3564	3564
22.5	0	0	0	0	28089	5618	5618
23.5	0	0	0	0	39658	7932	7932
24.5	0	0	0	0	50784	10157	10157
25.5	0	0	2	0	59680	11936	11936
26.5	0	0	5	2	65087	13019	13017
27.5	0	0	15	3	66577	13319	13315
28.5	0	0	39	7	64527	12915	12903
29.5	2	0	92	13	59837	11989	11962
30.5	7	0	198	24	53589	10764	10706
31.5	30	0	391	43	46769	9446	9331
32.5	109	0	712	73	40119	8203	7980
33.5	357	0	1208	121	34103	7158	6740
34.5	1041	0	1925	194	28948	6422	5642
35.5	2686	0	2904	304	24709	6121	4685
36.5	6136	0	4171	466	21344	6423	3902
37.5	12429	0	5745	699	18762	7527	3583
38.5	22416	0	7637	1028	16859	9588	4396
39.5	36212	0	9855	1486	15542	12619	6542
40.5	52797	0	12415	2113	14736	16412	9530
41.5	70091	0	15348	2962	14390	20558	12749
42.5	85586	1	18709	4095	14481	24574	15624
43.5	97196	4	22584	5592	15007	28076	17709
44.5	103903	11	27098	7548	15996	30911	18796
45.5	105896	27	32425	10080	17502	33186	18930
46.5	104273	67	38800	13326	19608	35215	18358
47.5	100544	156	46530	17450	22429	37422	17435
48.5	96208	349	56014	22647	26119	40268	16555
49.5	92516	746	67765	29142	30869	44208	16097
50.5	90428	1523	82435	37198	36916	49700	16388
51.5	90699	2978	100855	47114	44545	57238	17649
52.5	94018	5585	124062	59237	54089	67398	19980
53.5	101161	10079	153344	73958	65933	80895	23395
54.5	113141	17544	190276	91721	80506	98637	27893
55.5	131344	29525	236746	113027	98279	121784	33503
56.5	157653	48147	294973	138440	119749	151793	40300
57.5	194537	76213	367490	168590	145432	190452	48433
58.5	245078	117249	457091	204177	175838	239887	58147
59.5	312893	175439	566732	245976	211457	302499	69841
60.5	401908	255376	699360	294834	252736	380843	84098
61.5	515961	361574	857693	351667	300062	477391	101682
62.5	658255	497716	1043929	417450	353748	594220	123435
63.5	830757	665712	1259428	493201	414022	732624	150077
64.5	1033659	864731	1504386	579957	481024	892751	181947
65.5	1265065	1090500	1777566	678735	554814	1073336	218811
66.5	1520998	1335146	2076110	790499	635380	1271627	259780
67.5	1795755	1587795	2395520	916099	722661	1483566	303396
68.5	2082537	1835915	2729803	1056218	816567	1704208	347859
69.5	2374211	2067132	3071813	1211311	916999	1928294	391314
70.5	2664031	2271085	3413750	1381548	1023882	2150859	432123
71.5	2946189	2440856	3747758	1566757	1137174	2367747	469056
72.5	3216126	2573660	4066557	1766395	1256887	2575925	501351
73.5	3470582	2670724	4364008	1979524	1383091	2773586	528670
74.5	3707463	2736527	4635540	2204818	1515914	2960052	550988
75.5	3925565	2777696	4878406	2440599	1655529	3135559	568469
76.5	4124269	2801856	5091734	2684894	1802139	3300978	581370
77.5	4303245	2816666	5276392	2935515	1955952	3457554	589976
78.5	4462222	2829142	5434717	3190155	2117146	3606676	594577
79.5	4600844	2845281	5570145	3446497	2285837	3749721	595452
80.5	4718616	2869920	5686812	3702311	2462041	3887940	592873
81.5	4814930	2906756	5789161	3955542	2645633	4022404	587119
82.5	4889156	2958456	5881592	4204386	2836313	4153980	578498
83.5	4940781	3026787	5968170	4447322	3033577	4283328	567389
84.5	4969555	3112749	6052412	4683136	3236690	4410908	554289
85.5	4975636	3216670	6137128	4910899	3444672	4537001	539864
86.5	4959704	3338290	6224322	5129935	3656299	4661710	524980
87.5	4923029	3476809	6315141	5339756	3870109	4784969	510712
88.5	4867484	3630928	6409864	5539999	4084428	4906540	498289
89.5	4795498	3798889	6507920	5730344	4297407	5026012	488977
90.5	4709965	3978511	6607942	5910449	4507073	5142788	483890
91.5	4614108	4167245	6707844	6079882	4711384	5256092	483769
92.5	4511328	4362233	6804937	6238074	4908300	5364974	488802
93.5	4405044	4560387	6896067	6384292	5095846	5468327	498553
94.5	4298550	4758468	6977796	6517627	5272181	5564924	512036
95.5	4194886	4953178	7046592	6637009	5435660	5653465	527895
96.5	4096753	5141249	7099050	6741244	5584885	5732636	544613
97.5	4006449	5319531	7132108	6829066	5718745	5801180	560703
98.5	3925837	5485069	7143251	6899207	5836444	5857962	574838
99.5	3856347	5635178	7130688	6950476	5937509	5902040	585924
100.5	3798982	5767500	7093483	6981845	6021797	5932721	593132
101.5	3754350	5880061	7031621	6992529	6089472	5949607	595902
102.5	3722693	5971310	6946024	6982055	6140982	5952613	593927
103.5	3703918	6040148	6838489	6950325	6177028	5941982	587124
104.5	3697629	6085948	6711580	6897647	6198524	5918265	575605
105.5	3703153	6108563	6568467	6824753	6206550	5882297	559645
106.5	3719564	6108321	6412747	6732786	6202316	5835147	539653
107.5	3745705	6086000	6248248	6623270	6187114	5778067	516143
108.5	3780206	6042800	6078846	6498057	6162282	5712438	489718
109.5	3821512	5980294	5908301	6359257	6129171	5639707	461048
110.5	3867906	5900366	5740119	6209165	6089108	5561333	430862
111.5	3917548	5805150	5577458	6050172	6043377	5478741	399935
112.5	3968509	5696948	5423061	5884693	5993196	5393281	369084
113.5	4018823	5578157	5279226	5715087	5939701	5306199	339156
114.5	4066540	5451195	5147802	5543593	5883935	5218613	311018
115.5	4109780	5318430	5030208	5372281	5826840	5131508	285534
116.5	4146790	5182117	4927460	5203012	5769252	5045726	263525
117.5	4176003	5044347	4840209	5037413	5711898	4961974	245707
118.5	4196084	4907010	4768786	4876863	5655399	4880828	232604
119.5	4205967	4771766	4713233	4722494	5600268	4802746	224455
120.5	4204888	4640030	4673340	4575199	5546917	4728075	221173
121.5	4192396	4512965	4648669	4435644	5495654	4657066	222375
122.5	4168356	4391493	4638573	4304289	5446696	4589882	227498
123.5	4132935	4276298	4642208	4181409	5400168	4526604	235931
124.5	4086577	4167847	4658540	4067120	5356110	4467239	247116
125.5	4029972	4066413	4686344	3961399	5314482	4411722	260591
126.5	3964010	3972092	4724207	3864109	5275171	4359918	275987
127.5	3889741	3884829	4770528	3775019	5237996	4311623	292988
128.5	3808326	3804441	4823521	3693822	5202716	4266565	311300
129.5	3720988	3730639	4881225	3620153	5169032	4224407	330612
130.5	3628976	3663049	4941520	3553603	5136601	4184750	350580
131.5	3533523	3601230	5002157	3493731	5105036	4147135	370817
132.5	3435815	3544696	5060795	3440073	5073918	4111059	390899
133.5	3336968	3492926	5115049	3392154	5042805	4075980	410373
134.5	3238004	3445385	5162551	3349491	5011236	4041334	428776
135.5	3139844	3401538	5201017	3311604	4978743	4006549	445650
136.5	3043297	3360856	5228324	3278015	4944858	3971070	460565
137.5	2949056	3322836	5242576	3248260	4909124	3934370	473134
138.5	2857705	3287002	5242183	3221883	4871105	3895976	483032
139.5	2769718	3252923	5225919	3198449	4830389	3855480	490010
140.5	2685469	3220212	5192972	3177540	4786602	3812559	493901
141.5	2605237	3188540	5142977	3158760	4739415	3766986	494630
142.5	2529221	3157631	5076025	3141737	4688550	3718633	492214
143.5	2457542	3127273	4992661	3126124	4633783	3667477	486759
144.5	2390261	3097312	4893851	3111605	4574954	3613597	478453
145.5	2327381	3067657	4780932	3097890	4511967	3557166	467556
146.5	2268860	3038273	4655557	3084720	4444792	3498440	454383
147.5	2214616	3009177	4519613	3071868	4373466	3437748	439295
148.5	2164537	2980435	4375151	3059137	4298093	3375470	422674
149.5	2118483	2952155	4224296	3046363	4218835	3312026	404918
150.5	2076297	2924479	4069180	3033413	4135918	3247857	386415
151.5	2037805	2897574	3911867	3020184	4049618	3183409	367541
152.5	2002819	2871628	3754298	3006604	3960257	3119121	348641
153.5	1971144	2846838	3598247	2992626	3868198	3055411	330028
154.5	1942578	2823405	3445286	2978231	3773833	2992667	311980
155.5	1916915	2801528	3296765	2963424	3677579	2931242	294733
156.5	1893944	2781392	3153807	2948230	3579868	2871448	278487
157.5	1873452	2763170	3017306	2932692	3481136	2813551	263411
158.5	1855225	2747011	2887940	2916871	3381820	2757773	249640
159.5	1839049	2733041	2766187	2900838	3282348	2704292	237285
160.5	1824708	2721354	2652342	2884674	3183135	2653243	226435
161.5	1811988	2712014	2546542	2868469	3084574	2604718	217157
162.5	1800674	2705050	2448788	2852313	2987034	2558772	209497
163.5	1790552	2700452	2358967	2836301	2890856	2515425	203478
164.5	1781409	2698173	2276871	2820522	2796348	2474665	199095
165.5	1773035	2698127	2202220	2805065	2703787	2436447	196317
166.5	1765222	2700186	2134675	2790010	2613417	2400702	195078
167.5	1757762	2704183	2073851	2775429	2525445	2367334	195284
168.5	1750457	2709907	2019335	2761385	2440047	2336226	196815
169.5	1743107	2717110	1970685	2747929	2357365	2307239	199528
170.5	1735524	2725504	1927449	2735099	2277511	2280217	203266
171.5	1727523	2734762	1889161	2722919	2200569	2254987	207864
172.5	1718930	2744524	1855351	2711399	2126594	2231359	213157
173.5	1709580	2754397	1825547	2700534	2055619	2209135	218980
174.5	1699319	2763962	1799277	2690303	1987653	2188103	225177
175.5	1688007	2772776	1776073	2680670	1922689	2168043	231599
176.5	1675517	2780378	1755471	2671585	1860700	2148730	238107
177.5	1661737	2786300	1737016	2662979	1801646	2129936	244573
178.5	1646574	2790070	1720262	2654773	1745476	2111431	250878
179.5	1629949	2791220	1704776	2646870	1692127	2092989	256916
180.5	1611804	2789299	1690143	2639162	1641530	2074388	262589
181.5	1592098	2783878	1675965	2631529	1593609	2055416	267813
182.5	1570811	2774561	1661870	2623839	1548283	2035873	272513
183.5	1547941	2760991	1647512	2615950	1505469	2015572	276627
184.5	1523504	2742863	1632579	2607712	1465081	1994348	280106
185.5	1497538	2719926	1616792	2598971	1427033	1972052	282910
186.5	1470094	2691992	1599912	2589565	1391239	1948560	285015
187.5	1441242	2658943	1581742	2579331	1357614	1923774	286408
188.5	1411068	2620728	1562129	2568105	1326073	1897621	287088
189.5	1379669	2577371	1540966	2555725	1296535	1870053	287066
190.5	1347156	2528965	1518189	2542033	1268921	1841053	286366
191.5	1313648	2475675	1493780	2526877	1243152	1810627	285018
192.5	1279276	2417733	1467766	2510114	1219155	1778809	283066
193.5	1244171	2355430	1440210	2491609	1196858	1745656	280556
194.5	1208474	2289113	1411214	2471244	1176193	1711247	277544
195.5	1172324	2219175	1380908	2448914	1157093	1675683	274086
196.5	1135861	2146048	1349452	2424529	1139496	1639077	270245
197.5	1099226	2070193	1317025	2398022	1123341	1601561	266079
198.5	1062552	1992094	1283820	2369341	1108570	1563275	261649
199.5	1025970	1912241	1250041	2338459	1095128	1524368	257011
200.5	989606	1831132	1215896	2305368	1082961	1484993	252218
201.5	953576	1749256	1181590	2270084	1072018	1445305	247319
202.5	917989	1667090	1147326	2232645	1062248	1405460	242357
203.5	882946	1585091	1113294	2193111	1053603	1365609	237372
204.5	848537	1503690	1079674	2151563	1046037	1325900	232396
205.5	814843	1423289	1046631	2108103	1039502	1286474	227458
206.5	781936	1344256	1014313	2062851	1033954	1247462	222586
207.5	749877	1266922	982851	2015946	1029346	1208988	217799
208.5	718717	1191581	952355	1967542	1025634	1171166	213120
209.5	688500	1118488	922921	1917806	1022772	1134097	208565
210.5	659257	1047858	894625	1866917	1020716	1097875	204154
211.5	631016	979871	867526	1815060	1019418	1062578	199903
212.5	603791	914668	841667	1762429	1018833	1028277	195830
213.5	577593	852355	817078	1709219	1018912	995031	191952
214.5	552425	793006	793774	1655629	1019606	962888	188288
215.5	528283	736664	771759	1601854	1020865	931885	184854
216.5	505159	683345	751026	1548086	1022637	902051	181668
217.5	483039	633038	731561	1494511	1024869	873404	178745
218.5	461906	585711	713341	1441309	1027505	845954	176098
219.5	441739	541312	696336	1388647	1030488	819704	173739
220.5	422513	499773	680511	1336686	1033761	794649	171674
221.5	404203	461009	665829	1285570	1037261	770774	169908
222.5	386779	424927	652247	1235433	1040928	748063	168437
223.5	370211	391421	639722	1186396	1044697	726490	167258
224.5	354469	360379	628207	1138564	1048504	706025	166358
225.5	339520	331684	617656	1092030	1052282	686634	165723
226.5	325332	305216	608020	1046870	1055962	668280	165331
227.5	311873	280851	599252	1003150	1059478	650921	165160
228.5	299110	258467	591303	960920	1062761	634512	165183
229.5	287012	237941	584127	920219	1065742	619008	165371
230.5	275547	219154	577676	881072	1068353	604360	165691
231.5	264684	201988	571903	843495	1070526	590519	166114
232.5	254394	186329	566764	807492	1072196	577435	166605
233.5	244647	172070	562213	773058	1073298	565057	167135
234.5	235415	159106	558207	740181	1073771	553336	167672
235.5	226671	147337	554703	708839	1073556	542221	168187
236.5	218389	136670	551659	679006	1072597	531664	168653
237.5	210544	127018	549035	650648	1070842	521618	169045
238.5	203113	118299	546791	623728	1068246	512035	169339
239.5	196072	110436	544888	598203	1064765	502873	169515
240.5	189400	103358	543289	574030	1060363	494088	169556
241.5	183076	97002	541957	551161	1055010	485641	169445
242.5	177081	91306	540857	529547	1048681	477495	169170
243.5	171397	86218	539955	509137	1041357	469613	168720
244.5	166005	81687	539218	489880	1033028	461964	168087
245.5	160890	77669	538612	471726	1023688	454517	167266
246.5	156036	74124	538108	454622	1013342	447246	166253
247.5	151427	71016	537675	438519	1001999	440127	165047
248.5	147051	68315	537284	423367	989674	433138	163648
249.5	142895	65991	536908	409116	976393	426261	162061
250.5	138945	64022	536521	395719	962184	419478	160287
251.5	135191	62388	536096	383131	947084	412778	158335
252.5	131621	61070	535611	371307	931135	406149	156210
253.5	128227	60056	535042	360203	914385	399582	153921
254.5	124997	59335	534367	349778	896887	393073	151478
255.5	121923	58898	533566	339993	878697	386615	148891
256.5	118997	58742	532620	330811	859877	380209	146172
257.5	116211	58863	531511	322194	840489	373854	143330
258.5	113558	59264	530222	314108	820601	367551	140379
259.5	111030	59947	528737	306521	800281	361303	137330
260.5	108622	60919	527043	299402	779598	355117	134194
261.5	106327	62189	525127	292722	758623	348997	130983
262.5	104139	63769	522975	286452	737425	342952	127708
263.5	102054	65674	520578	280565	716074	336989	124379
264.5	100067	67922	517926	275038	694637	331118	121005
265.5	98172	70533	515010	269847	673181	325349	117597
266.5	96365	73531	511824	264969	651770	319692	114161
267.5	94643	76944	508360	260384	630465	314159	110705
268.5	93002	80801	504615	256072	609323	308762	107236
269.5	91438	85135	500583	252014	588399	303514	103758
270.5	89947	89981	496263	248193	567745	298426	100277
271.5	88527	95380	491651	244594	547408	293512	96796
272.5	87175	101372	486747	241200	527429	288784	93321
273.5	85887	108001	481552	237997	507849	284257	89854
274.5	84662	115313	476066	234972	488701	279943	86402
275.5	83496	123355	470292	232113	470016	275855	82969
276.5	82389	132176	464233	229408	451821	272005	79563
277.5	81336	141825	457893	226847	434137	268407	76196
278.5	80337	152348	451276	224418	416984	265073	72882
279.5	79389	163791	444391	222113	400375	262012	69641
280.5	78491	176198	437242	219924	384321	259235	66499
281.5	77640	189606	429839	217842	368831	256752	63492
282.5	76836	204045	422191	215861	353909	254568	60665
283.5	76076	219540	414308	213972	339556	252690	58076
284.5	75359	236103	406200	212172	325771	251121	55793
285.5	74683	253735	397879	210452	312550	249860	53896
286.5	74047	272423	389358	208810	299889	248905	52470
287.5	73450	292138	380651	207239	287778	248251	51602
288.5	72890	312831	371772	205736	276209	247888	51365
289.5	72367	334434	362736	204297	265171	247801	51811
290.5	71877	356858	353559	202919	254651	247973	52957
291.5	71421	379989	344258	201599	244636	248381	54786
292.5	70997	403692	334849	200333	235113	248997	57248
293.5	70604	427806	325350	199120	226065	249789	60265
294.5	70241	452148	315780	197957	217478	250721	63745
295.5	69906	476510	306156	196842	209337	251750	67586
296.5	69598	500666	296498	195774	201624	252832	71687
297.5	69315	524371	286824	194751	194324	253917	75947
298.5	69057	547367	277154	193772	187421	254954	80268
299.5	68823	569382	267505	192835	180899	255889	84559
300.5	68610	590141	257899	191939	174741	256666	88734
301.5	68417	609370	248351	191084	168933	257231	92710
302.5	68244	626798	238882	190267	163459	257530	96413
303.5	68088	642167	229509	189490	158304	257511	99773
304.5	67948	655237	220248	188749	153453	257127	102729
305.5	67823	665794	211118	188045	148893	256334	105225
306.5	67711	673650	202133	187376	144610	255096	107214
307.5	67611	678654	193308	186741	140590	253381	108660
308.5	67521	680697	184658	186140	136822	251167	109533
309.5	67439	679708	176195	185571	133292	248441	109814
310.5	67363	675665	167932	185033	129990	245197	109496
311.5	67292	668590	159880	184525	126905	241438	108580
312.5	67224	658553	152047	184045	124024	237179	107078
313.5	67157	645669	144444	183592	121340	232440	105012
314.5	67089	630094	137077	183164	118841	227253	102411
315.5	67019	612024	129952	182759	116519	221655	99317
316.5	66943	591688	123074	182377	114365	215689	95774
317.5	66861	569343	116447	182013	112371	209407	91837
318.5	66770	545270	110073	181667	110529	202862	87564
319.5	66668	519765	103954	181336	108831	196111	83017
320.5	66553	493132	98090	181018	107270	189213	78261
321.5	66423	465678	92481	180710	105840	182226	73364
322.5	66276	437706	87123	180409	104534	175210	68393
323.5	66109	409509	82015	180113	103346	168218	63415
324.5	65921	381365	77154	179818	102270	161306	58495
325.5	65709	353532	72534	179522	101300	154520	53699
326.5	65472	326244	68150	179221	100432	147904	49089
327.5	65208	299709	63998	178912	99660	141498	44726
328.5	64914	274108	60070	178592	98980	135333	40666
329.5	64589	249589	56360	178257	98386	129436	36966
330.5	64230	226275	52861	177904	97875	123829	33676
331.5	63837	204258	49565	177529	97442	118526	30840
332.5	63408	183603	46465	177129	97083	113537	28492
333.5	62941	164348	43552	176700	96794	108867	26646
334.5	62434	146508	40819	176238	96571	104514	25297
335.5	61887	130078	38258	175741	96410	100475	24411
336.5	61299	115033	35860	175204	96308	96741	23931
337.5	60669	101333	33618	174624	96262	93301	23784
338.5	59996	88925	31524	173998	96267	90142	23891
339.5	59279	77745	29569	173323	96320	87247	24177
340.5	58519	67724	27747	172596	96419	84601	24577
341.5	57715	58784	26049	171813	96559	82184	25037
342.5	56868	50849	24469	170973	96737	79979	25519
343.5	55977	43836	23000	170073	96951	77968	25994
344.5	55043	37667	21635	169110	97197	76131	26441
345.5	54068	32264	20368	168083	97473	74451	26849
346.5	53052	27551	19192	166990	97774	72912	27209
347.5	51997	23457	18102	165829	98097	71496	27518
348.5	50904	19914	17092	164600	98441	70190	27776
349.5	49775	16860	16157	163301	98801	68979	27983
350.5	48611	14237	15292	161932	99176	67849	28142
351.5	47415	11992	14492	160493	99561	66790	28255
352.5	46190	10076	13753	158984	99954	65791	28327
353.5	44938	8448	13071	157405	100352	64843	28360
354.5	43661	7067	12442	155758	100752	63936	28358
355.5	42362	5900	11863	154043	101151	63064	28325
356.5	41045	4916	11329	152262	101547	62220	28263
357.5	39713	4089	10839	150416	101937	61399	28177
358.5	38368	3396	10389	148509	102318	60596	28068
359.5	37014	2816	9976	146542	102687	59807	27939
360.5	35655	2332	9598	144518	103042	59029	27794
361.5	34293	1929	9253	142440	103381	58259	27633
362.5	32933	1593	8938	140311	103701	57495	27459
363.5	31576	1315	8653	138134	103999	56736	27273
364.5	30228	1085	8394	135914	104274	55979	27077
365.5	28890	894	8161	133654	104523	55225	26872
366.5	27566	737	7952	131358	104744	54471	26659
367.5	26260	607	7766	129030	104935	53720	26440
368.5	24973	500	7602	126674	105095	52969	26215
369.5	23709	411	7458	124295	105221	52219	25985
370.5	22471	339	7334	121897	105312	51470	25751
371.5	21260	279	7228	119484	105367	50724	25513
372.5	20079	230	7141	117060	105383	49979	25272
373.5	18930	190	7071	114631	105361	49236	25028
374.5	17815	157	7019	112199	105298	48497	24782
375.5	16735	129	6983	109770	105194	47762	24533
376.5	15692	107	6964	107347	105047	47031	24283
377.5	14688	89	6960	104934	104858	46306	24031
378.5	13722	73	6973	102536	104626	45586	23777
379.5	12795	61	7001	100155	104349	44872	23521
380.5	11909	51	7046	97796	104029	44166	23264
381.5	11063	42	7106	95461	103664	43467	23005
382.5	10258	35	7182	93154	103255	42777	22745
383.5	9493	30	7275	90877	102802	42095	22483
384.5	8768	25	7384	88634	102305	41423	22220
385.5	8083	21	7511	86427	101764	40761	21954
386.5	7437	18	7654	84258	101181	40109	21687
387.5	6829	15	7816	82129	100555	39469	21419
388.5	6259	13	7995	80042	99887	38839	21148
389.5	5724	11	8194	77999	99179	38221	20876
390.5	5225	9	8413	76001	98430	37616	20601
391.5	4760	8	8651	74050	97643	37023	20325
392.5	4328	7	8911	72147	96819	36442	20046
393.5	3927	6	9193	70292	95958	35875	19766
394.5	3556	5	9498	68485	95061	35321	19483
395.5	3214	4	9827	66729	94131	34781	19199
396.5	2898	4	10181	65023	93169	34255	18912
397.5	2609	3	10560	63366	92175	33743	18624
398.5	2343	3	10966	61760	91153	33245	18334
399.5	2100	3	11401	60204	90102	32762	18042
400.5	1879	2	11864	58698	89026	32294	17749
401.5	1677	2	12358	57241	87925	31841	17455
402.5	1494	2	12883	55833	86801	31403	17160
403.5	1329	2	13441	54474	85655	30980	16864
404.5	1179	2	14032	53162	84491	30573	16567
405.5	1044	1	14658	51898	83308	30182	16271
406.5	922	1	15320	50680	82110	29807	15975
407.5	813	1	16019	49507	80897	29448	15679
408.5	716	1	16756	48379	79671	29105	15385
409.5	629	1	17531	47294	78434	28778	15092
410.5	551	0	18346	46252	77188	28468	14802
411.5	482	0	19201	45252	75934	28174	14515
412.5	420	0	20097	44291	74673	27897	14232
413.5	366	0	21034	43371	73408	27636	13953
414.5	318	0	22012	42488	72139	27392	13679
415.5	276	0	23031	41643	70868	27164	13412
416.5	239	0	24092	40834	69597	26952	13152
417.5	206	0	25193	40060	68326	26757	12900
418.5	178	0	26333	39319	67058	26578	12658
419.5	153	0	27513	38611	65793	26414	12426
420.5	131	0	28731	37935	64533	26266	12205
421.5	113	0	29984	37289	63278	26133	11998
422.5	96	0	31272	36673	62030	26014	11804
423.5	82	0	32592	36085	60790	25910	11626
424.5	70	0	33941	35524	59559	25819	11463
425.5	60	0	35317	34989	58338	25741	11318
426.5	50	0	36717	34480	57127	25675	11190
427.5	43	0	38136	33995	55928	25620	11081
428.5	36	0	39571	33532	54741	25576	10991
429.5	30	0	41017	33092	53567	25541	10920
430.5	26	0	42470	32674	52406	25515	10869
431.5	22	0	43925	32275	51260	25496	10836
432.5	18	0	45377	31896	50128	25484	10821
433.5	15	0	46820	31535	49012	25477	10825
434.5	13	0	48249	31192	47911	25473	10844
435.5	10	0	49657	30865	46826	25472	10879
436.5	9	0	51039	30555	45758	25472	10927
437.5	7	0	52388	30259	44707	25472	10988
438.5	6	0	53698	29978	43673	25471	11058
439.5	5	1	54963	29710	42656	25467	11136
440.5	4	1	56176	29454	41656	25458	11220
441.5	3	1	57333	29210	40675	25444	11308
442.5	3	1	58425	28978	39711	25424	11398
443.5	2	1	59448	28755	38765	25394	11488
444.5	2	2	60396	28543	37837	25356	11575
445.5	2	2	61264	28339	36927	25307	11657
446.5	1	2	62047	28143	36035	25246	11734
447.5	1	2	62739	27955	35161	25172	11802
448.5	0	2	63338	27774	34305	25084	11862
449.5	0	2	63840	27599	33467	24982	11910
450.5	0	2	64241	27430	32647	24864	11946
451.5	0	3	64539	27266	31844	24730	11968
452.5	0	3	64732	27106	31059	24580	11976
453.5	0	3	64819	26950	30292	24413	11970
454.5	0	4	64798	26797	29542	24228	11947
455.5	0	4	64670	26647	28808	24026	11908
456.5	0	4	64436	26499	28092	23806	11853
457.5	0	5	64096	26352	27393	23569	11780
458.5	0	5	63652	26207	26710	23315	11692
459.5	0	6	63107	26062	26043	23043	11586
460.5	0	7	62462	25917	25392	22756	11465
461.5	0	7	61723	25772	24757	22452	11328
462.5	0	8	60892	25627	24137	22133	11176
463.5	0	9	59974	25480	23533	21799	11009
464.5	0	10	58973	25331	22944	21452	10828
465.5	0	11	57895	25181	22370	21091	10635
466.5	0	12	56746	25028	21810	20719	10430
467.5	0	14	55530	24873	21264	20336	10214
468.5	0	15	54253	24715	20732	19943	9989
469.5	0	17	52923	24554	20214	19542	9754
470.5	0	19	51544	24389	19709	19132	9513
471.5	0	21	50124	24221	19218	18717	9265
472.5	0	24	48668	24048	18739	18296	9012
473.5	0	27	47182	23872	18273	17871	8755
474.5	0	30	45673	23691	17819	17443	8496
475.5	0	33	44147	23506	17377	17013	8235
476.5	0	37	42609	23316	16947	16582	7974
477.5	0	41	41065	23122	16528	16151	7713
478.5	0	45	39520	22923	16120	15722	7454
479.5	0	51	37980	22719	15724	15295	7198
480.5	0	56	36449	22511	15338	14871	6946
481.5	0	63	34931	22297	14962	14451	6698
482.5	0	69	33432	22079	14597	14036	6455
483.5	0	77	31955	21857	14241	13626	6218
484.5	0	86	30503	21629	13896	13223	5988
485.5	0	95	29079	21397	13559	12826	5765
486.5	0	105	27687	21160	13232	12437	5550
487.5	0	117	26329	20920	12914	12056	5343
488.5	0	129	25007	20674	12604	11683	5144
489.5	0	143	23724	20425	12303	11319	4954
490.5	0	158	22480	20172	12010	10964	4772
491.5	0	174	21276	19916	11725	10618	4599
492.5	0	192	20115	19655	11448	10282	4435
493.5	0	212	18996	19392	11178	9956	4280
494.5	0	233	17920	19125	10916	9639	4133
495.5	0	256	16888	18856	10661	9332	3994
496.5	0	282	15898	18584	10413	9035	3863
497.5	0	309	14952	18310	10172	8749	3740
498.5	0	339	14049	18033	9937	8472	3623
499.5	0	372	13187	17755	9709	8205	3514
500.5	0	407	12367	17476	9487	7947	3411
501.5	0	444	11587	17195	9271	7699	3314
502.5	0	485	10847	16913	9061	7461	3223
503.5	0	529	10146	16630	8856	7232	3136
504.5	0	576	9482	16347	8657	7013	3054
505.5	0	627	8855	16064	8464	6802	2976
506.5	0	681	8263	15781	8276	6600	2902
507.5	0	739	7704	15498	8092	6407	2832
508.5	0	801	7178	15216	7914	6222	2764
509.5	0	867	6683	14935	7741	6045	2699
510.5	0	937	6218	14655	7572	5876	2636
511.5	0	1012	5782	14376	7407	5715	2576
512.5	0	1091	5373	14099	7247	5562	2517
513.5	0	1175	4989	13824	7091	5416	2460
514.5	0	1263	4631	13551	6940	5277	2404
515.5	0	1357	4295	13281	6792	5145	2350
516.5	0	1455	3982	13012	6648	5019	2297
517.5	0	1558	3690	12747	6508	4900	2245
518.5	0	1667	3417	12484	6371	4788	2194
519.5	0	1780	3163	12224	6238	4681	2144
520.5	0	1898	2926	11968	6109	4580	2095
521.5	0	2022	2706	11714	5983	4485	2048
522.5	0	2150	2502	11465	5859	4395	2001
523.5	0	2283	2312	11218	5740	4311	1955
524.5	0	2421	2135	10976	5623	4231	1911
525.5	0	2563	1971	10737	5509	4156	1867
526.5	0	2710	1819	10503	5398	4086	1825
527.5	0	2861	1679	10272	5289	4020	1784
528.5	0	3017	1548	10045	5183	3959	1745
529.5	0	3175	1428	9823	5080	3901	1708
530.5	0	3338	1316	9605	4980	3848	1672
531.5	0	3503	1213	9391	4881	3798	1638
532.5	0	3671	1117	9181	4786	3751	1606
533.5	0	3841	1029	8975	4692	3707	1576
534.5	0	4013	947	8774	4601	3667	1548
535.5	0	4187	872	8577	4512	3630	1522
536.5	0	4361	803	8385	4424	3595	1499
537.5	0	4536	739	8197	4339	3562	1478
538.5	0	4711	679	8013	4256	3532	1460
539.5	0	4885	625	7833	4175	3504	1443
540.5	0	5057	575	7658	4095	3477	1430
541.5	0	5228	528	7487	4018	3452	1418
542.5	0	5396	486	7320	3942	3429	1409
543.5	0	5561	446	7158	3868	3407	1402
544.5	0	5723	410	6999	3795	3385	1396
545.5	0	5880	377	6845	3724	3365	1393
546.5	0	6032	346	6695	3654	3345	1391
547.5	0	6178	318	6548	3586	3326	1391
548.5	0	6318	292	6406	3520	3307	1392
549.5	0	6451	268	6267	3455	3288	1394
550.5	0	6577	246	6133	3391	3269	1396
551.5	0	6696	226	6002	3328	3250	1399
552.5	0	6805	208	5875	3267	3231	1403
553.5	0	6906	191	5751	3207	3211	1406
554.5	0	6998	175	5631	3148	3190	1409
555.5	0	7080	161	5514	3090	3169	1412
556.5	0	7151	147	5401	3034	3147	1415
557.5	0	7213	135	5291	2978	3123	1416
558.5	0	7263	124	5184	2924	3099	1417
559.5	0	7303	114	5081	2870	3074	1417
560.5	0	7332	104	4980	2818	3047	1416
561.5	0	7349	96	4883	2766	3019	1413
562.5	0	7356	88	4788	2716	2989	1409
563.5	0	7350	80	4697	2666	2959	1404
564.5	0	7334	74	4608	2618	2927	1397
565.5	0	7307	68	4522	2570	2893	1389
566.5	0	7268	62	4438	2523	2858	1379
567.5	0	7219	57	4358	2477	2822	1368
568.5	0	7159	52	4279	2431	2784	1355
569.5	0	7089	48	4203	2387	2745	1340
570.5	0	7008	44	4130	2343	2705	1324
571.5	0	6918	40	4059	2300	2663	1307
572.5	0	6819	37	3990	2257	2621	1288
573.5	0	6711	33	3923	2216	2577	1268
574.5	0	6595	31	3859	2175	2532	1246
575.5	0	6472	28	3796	2134	2486	1224
576.5	0	6340	26	3736	2095	2439	1200
577.5	0	6203	23	3677	2056	2392	1175
578.5	0	6059	21	3620	2017	2344	1149
579.5	0	5909	20	3565	1979	2295	1123
580.5	0	5755	18	3512	1942	2245	1096
581.5	0	5596	16	3461	1905	2196	1068
582.5	0	5434	15	3411	1869	2146	1040
583.5	0	5268	14	3363	1834	2096	1012
584.5	0	5100	12	3316	1799	2046	983
585.5	0	4930	11	3271	1764	1995	954
586.5	0	4759	10	3227	1730	1945	926
587.5	0	4587	9	3185	1697	1896	897
588.5	0	4414	9	3144	1664	1846	869
589.5	0	4242	8	3105	1631	1797	841
590.5	0	4071	7	3066	1599	1749	814
591.5	0	3901	7	3029	1568	1701	787
592.5	0	3732	6	2993	1537	1654	761
593.5	0	3566	5	2958	1506	1607	736
594.5	0	3402	5	2925	1476	1562	711
595.5	0	3241	4	2892	1446	1517	688
596.5	0	3083	4	2860	1417	1473	665
597.5	0	2929	4	2830	1388	1430	644
598.5	0	2778	3	2800	1360	1388	623
599.5	0	2631	3	2771	1332	1347	604
600.5	0	2489	3	2744	1304	1308	586
601.5	0	2351	3	2717	1277	1269	569
602.5	0	2217	2	2690	1250	1232	554
603.5	0	2088	2	2665	1223	1196	539
604.5	0	1964	2	2640	1197	1161	526
605.5	0	1845	2	2616	1172	1127	513
606.5	0	1730	2	2593	1146	1094	502
607.5	0	1620	1	2571	1122	1063	492
608.5	0	1515	1	2549	1097	1032	483
609.5	0	1415	1	2527	1073	1003	475
610.5	0	1320	1	2507	1049	975	467
611.5	0	1229	0	2486	1026	948	461
612.5	0	1143	0	2467	1002	923	455
613.5	0	1062	0	2448	980	898	450
614.5	0	985	0	2429	957	874	445
615.5	0	912	0	2411	935	852	441
616.5	0	844	0	2393	914	830	437
617.5	0	780	0	2376	892	810	434
618.5	0	719	0	2359	871	790	431
619.5	0	663	0	2342	851	771	429
620.5	0	610	0	2326	830	753	426
621.5	0	560	0	2310	810	736	424
622.5	0	514	0	2294	791	720	422
623.5	0	471	0	2279	771	704	420
624.5	0	431	0	2264	752	689	418
625.5	0	394	0	2249	733	675	417
626.5	0	359	0	2235	715	662	415
627.5	0	328	0	2220	697	649	413
628.5	0	298	0	2206	679	637	412
629.5	0	271	0	2192	662	625	410
630.5	0	246	0	2178	645	614	409
631.5	0	223	0	2165	628	603	407
632.5	0	202	0	2151	611	593	405
633.5	0	183	0	2138	595	583	404
634.5	0	165	0	2124	579	574	402
635.5	0	149	0	2111	564	565	400
636.5	0	134	0	2098	548	556	398
637.5	0	121	0	2085	533	548	397
638.5	0	108	0	2072	518	540	395
639.5	0	97	0	2059	504	532	393
640.5	0	87	0	2045	490	525	391
641.5	0	78	0	2032	476	517	389
642.5	0	70	0	2019	462	510	387
643.5	0	62	0	2006	449	503	385
644.5	0	56	0	1993	436	497	383
645.5	0	50	0	1979	423	490	381
646.5	0	44	0	1966	411	484	378
647.5	0	39	0	1953	399	478	376
648.5	0	35	0	1939	387	472	374
649.5	0	31	0	1926	375	466	372
650.5	0	27	0	1912	363	461	369
651.5	0	24	0	1898	352	455	367
652.5	0	21	0	1884	341	449	365
653.5	0	19	0	1870	331	444	362
654.5	0	17	0	1856	320	439	360
655.5	0	15	0	1842	310	433	357
656.5	0	13	0	1827	300	428	354
657.5	0	11	0	1812	291	423	352
658.5	0	10	0	1798	281	418	349
659.5	0	9	0	1783	272	413	346
660.5	0	8	0	1768	263	408	344
661.5	0	7	0	1752	254	403	341
662.5	0	6	0	1737	246	398	338
663.5	0	5	0	1721	237	393	335
664.5	0	4	0	1705	229	388	332
665.5	0	4	0	1689	221	383	329
666.5	0	3	0	1673	214	378	326
667.5	0	3	0	1657	206	373	323
668.5	0	2	0	1640	199	368	320
669.5	0	2	0	1623	192	363	317
670.5	0	2	0	1606	185	359	314
671.5	0	2	0	1589	178	354	311
672.5	0	1	0	1572	172	349	308
673.5	0	1	0	1554	166	344	304
674.5	0	1	0	1537	160	339	301
675.5	0	0	0	1519	154	335	298
676.5	0	0	0	1501	148	330	294
677.5	0	0	0	1483	142	325	291
678.5	0	0	0	1465	137	320	287
679.5	0	0	0	1446	132	316	284
680.5	0	0	0	1428	127	311	280
681.5	0	0	0	1409	122	306	277
682.5	0	0	0	1390	117	301	273
683.5	0	0	0	1371	112	297	269
684.5	0	0	0	1352	108	292	266
685.5	0	0	0	1333	104	287	262
686.5	0	0	0	1313	99	283	258
687.5	0	0	0	1294	95	278	255
688.5	0	0	0	1274	91	273	251
689.5	0	0	0	1255	88	269	247
690.5	0	0	0	1235	84	264	243
691.5	0	0	0	1215	81	259	240
692.5	0	0	0	1196	77	255	236
693.5	0	0	0	1176	74	250	232
694.5	0	0	0	1156	71	245	228
695.5	0	0	0	1136	68	241	224
696.5	0	0	0	1116	65	236	220
697.5	0	0	0	1096	62	232	216
698.5	0	0	0	1076	59	227	213
699.5	0	0	0	1057	57	223	209
700.5	0	0	0	1037	54	218	205
701.5	0	0	0	1017	52	214	201
702.5	0	0	0	997	49	209	197
703.5	0	0	0	978	47	205	193
704.5	0	0	0	958	45	201	190
705.5	0	0	0	938	43	196	186
706.5	0	0	0	919	41	192	182
707.5	0	0	0	900	39	188	178
708.5	0	0	0	880	37	184	174
709.5	0	0	0	861	36	179	171
710.5	0	0	0	842	34	175	167
711.5	0	0	0	823	32	171	163
712.5	0	0	0	805	31	167	160
713.5	0	0	0	786	29	163	156
714.5	0	0	0	768	28	159	152
715.5	0	0	0	749	26	155	149
716.5	0	0	0	731	25	151	145
717.5	0	0	0	713	24	147	142
718.5	0	0	0	696	23	144	138
719.5	0	0	0	678	22	140	135
720.5	0	0	0	661	20	136	131
721.5	0	0	0	644	19	133	128
722.5	0	0	0	627	18	129	125
723.5	0	0	0	610	18	126	121
724.5	0	0	0	594	17	122	118
725.5	0	0	0	578	16	119	115
726.5	0	0	0	562	15	115	112
727.5	0	0	0	546	14	112	109
728.5	0	0	0	531	13	109	106
729.5	0	0	0	516	13	106	102
730.5	0	0	0	501	12	103	100
731.5	0	0	0	486	11	99	97
732.5	0	0	0	471	11	96	94
733.5	0	0	0	457	10	93	91
734.5	0	0	0	443	10	91	88
735.5	0	0	0	430	9	88	86
736.5	0	0	0	416	9	85	83
737.5	0	0	0	403	8	82	80
738.5	0	0	0	390	8	80	78
739.5	0	0	0	378	7	77	75
740.5	0	0	0	366	7	74	73
741.5	0	0	0	354	6	72	70
742.5	0	0	0	342	6	70	68
743.5	0	0	0	330	6	67	66
744.5	0	0	0	319	5	65	64
745.5	0	0	0	308	5	63	61
746.5	0	0	0	298	5	60	59
747.5	0	0	0	287	5	58	57
748.5	0	0	0	277	4	56	55
749.5	0	0	0	267	4	54	53
750.5	0	0	0	257	4	52	51
751.5	0	0	0	248	4	50	49
752.5	0	0	0	239	3	48	48
753.5	0	0	0	230	3	47	46
754.5	0	0	0	222	3	45	44
755.5	0	0	0	213	3	43	42
756.5	0	0	0	205	3	42	41
757.5	0	0	0	197	2	40	39
758.5	0	0	0	189	2	38	38
759.5	0	0	0	182	2	37	36
760.5	0	0	0	175	2	35	35
761.5	0	0	0	168	2	34	33
762.5	0	0	0	161	2	33	32
763.5	0	0	0	155	2	31	31
764.5	0	0	0	148	2	30	30
765.5	0	0	0	142	1	29	28
766.5	0	0	0	136	1	28	27
767.5	0	0	0	131	1	26	26
768.5	0	0	0	125	1	25	25
769.5	0	0	0	120	1	24	24
770.5	0	0	0	115	1	23	23
771.5	0	0	0	110	0	22	22
772.5	0	0	0	105	0	21	21
773.5	0	0	0	100	0	20	20
774.5	0	0	0	96	0	19	19
775.5	0	0	0	92	0	18	18
776.5	0	0	0	87	0	18	17
777.5	0	0	0	83	0	17	17
778.5	0	0	0	80	0	16	16
779.5	0	0	0	76	0	15	15
780.5	0	0	0	72	0	15	14
781.5	0	0	0	69	0	14	14
782.5	0	0	0	66	0	13	13
783.5	0	0	0	63	0	13	13
784.5	0	0	0	60	0	12	12
785.5	0	0	0	57	0	11	11
786.5	0	0	0	54	0	11	11
787.5	0	0	0	51	0	10	10
788.5	0	0	0	49	0	10	10
789.5	0	0	0	47	0	9	9
790.5	0	0	0	44	0	9	9
791.5	0	0	0	42	0	8	8
792.5	0	0	0	40	0	8	8
793.5	0	0	0	38	0	8	8
794.5	0	0	0	36	0	7	7
795.5	0	0	0	34	0	7	7
796.5	0	0	0	32	0	7	6
797.5	0	0	0	31	0	6	6
798.5	0	0	0	29	0	6	6
799.5	0	0	0	28	0	6	6
800.5	0	0	0	26	0	5	5
801.5	0	0	0	25	0	5	5
802.5	0	0	0	23	0	5	5
803.5	0	0	0	22	0	4	4
804.5	0	0	0	21	0	4	4
805.5	0	0	0	20	0	4	4
806.5	0	0	0	19	0	4	4
807.5	0	0	0	18	0	4	4
808.5	0	0	0	17	0	3	3
809.5	0	0	0	16	0	3	3
810.5	0	0	0	15	0	3	3
811.5	0	0	0	14	0	3	3
812.5	0	0	0	13	0	3	3
813.5	0	0	0	13	0	3	3
814.5	0	0	0	12	0	2	2
815.5	0	0	0	11	0	2	2
816.5	0	0	0	10	0	2	2
817.5	0	0	0	10	0	2	2
818.5	0	0	0	9	0	2	2
819.5	0	0	0	9	0	2	2
820.5	0	0	0	8	0	2	2
821.5	0	0	0	8	0	2	2
822.5	0	0	0	7	0	1	1
823.5	0	0	0	7	0	1	1
824.5	0	0	0	6	0	1	1
825.5	0	0	0	6	0	1	1
826.5	0	0	0	6	0	1	1
827.5	0	0	0	5	0	1	1
828.5	0	0	0	5	0	1	1
829.5	0	0	0	5	0	0	0
830.5	0	0	0	4	0	0	0
831.5	0	0	0	4	0	0	0
832.5	0	0	0	4	0	0	0
833.5	0	0	0	4	0	0	0
834.5	0	0	0	3	0	0	0
835.5	0	0	0	3	0	0	0
836.5	0	0	0	3	0	0	0
837.5	0	0	0	3	0	0	0
838.5	0	0	0	3	0	0	0
839.5	0	0	0	2	0	0	0
840.5	0	0	0	2	0	0	0
841.5	0	0	0	2	0	0	0
842.5	0	0	0	2	0	0	0
843.5	0	0	0	2	0	0	0
844.5	0	0	0	2	0	0	0
845.5	0	0	0	2	0	0	0
846.5	0	0	0	2	0	0	0
847.5	0	0	0	1	0	0	0
848.5	0	0	0	1	0	0	0
849.5	0	0	0	1	0	0	0
850.5	0	0	0	1	0	0	0
851.5	0	0	0	1	0	0	0
852.5	0	0	0	1	0	0	0
853.5	0	0	0	0	0	0	0
854.5	0	0	0	0	0	0	0
855.5	0	0	0	0	0	0	0
856.5	0	0	0	0	0	0	0
857.5	0	0	0	0	0	0	0
858.5	0	0	0	0	0	0	0
859.5	0	0	0	0	0	0	0
860.5	0	0	0	0	0	0	0
861.5	0	0	0	0	0	0	0
862.5	0	0	0	0	0	0	0
863.5	0	0	0	0	0	0	0
864.5	0	0	0	0	0	0	0
865.5	0	0	0	0	0	0	0
866.5	0	0	0	0	0	0	0
867.5	0	0	0	0	0	0	0
868.5	0	0	0	0	0	0	0
869.5	0	0	0	0	0	0	0
870.5	0	0	0	0	0	0	0
871.5	0	0	0	0	0	0	0
872.5	0	0	0	0	0	0	0
873.5	0	0	0	0	0	0	0
874.5	0	0	0	0	0	0	0
875.5	0	0	0	0	0	0	0
876.5	0	0	0	0	0	0	0
877.5	0	0	0	0	0	0	0
878.5	0	0	0	0	0	0	0
879.5	0	0	0	0	0	0	0
880.5	0	0	0	0	0	0	0
881.5	0	0	0	0	0	0	0
882.5	0	0	0	0	0	0	0
883.5	0	0	0	0	0	0	0
884.5	0	0	0	0	0	0	0
885.5	0	0	0	0	0	0	0
886.5	0	0	0	0	0	0	0
887.5	0	0	0	0	0	0	0
888.5	0	0	0	0	0	0	0
889.5	0	0	0	0	0	0	0
890.5	0	0	0	0	0	0	0
891.5	0	0	0	0	0	0	0
892.5	0	0	0	0	0	0	0
893.5	0	0	0	0	0	0	0
894.5	0	0	0	0	0	0	0
895.5	0	0	0	0	0	0	0
896.5	0	0	0	0	0	0	0
897.5	0	0	0	0	0	0	0
898.5	0	0	0	0	0	0	0
899.5	0	0	0	0	0	0	0
900.5	0	0	0	0	0	0	0
901.5	0	0	0	0	0	0	0
902.5	0	0	0	0	0	0	0
903.5	0	0	0	0	0	0	0
904.5	0	0	0	0	0	0	0
905.5	0	0	0	0	0	0	0
906.5	0	0	0	0	0	0	0
907.5	0	0	0	0	0	0	0
908.5	0	0	0	0	0	0	0
909.5	0	0	0	0	0	0	0
910.5	0	0	0	0	0	0	0
911.5	0	0	0	0	0	0	0
912.5	0	0	0	0	0	0	0
913.5	0	0	0	0	0	0	0
914.5	0	0	0	0	0	0	0
915.5	0	0	0	0	0	0	0
916.5	0	0	0	0	0	0	0
917.5	0	0	0	0	0	0	0
918.5	0	0	0	0	0	0	0
919.5	0	0	0	0	0	0	0
920.5	0	0	0	0	0	0	0
921.5	0	0	0	0	0	0	0
922.5	0	0	0	0	0	0	0
923.5	0	0	0	0	0	0	0
924.5	0	0	0	0	0	0	0
925.5	0	0	0	0	0	0	0
926.5	0	0	0	0	0	0	0
927.5	0	0	0	0	0	0	0
928.5	0	0	0	0	0	0	0
929.5	0	0	0	0	0	0	0
930.5	0	0	0	0	0	0	0
931.5	0	0	0	0	0	0	0
932.5	0	0	0	0	0	0	0
933.5	0	0	0	0	0	0	0
934.5	0	0	0	0	0	0	0
935.5	0	0	0	0	0	0	0
936.5	0	0	0	0	0	0	0
937.5	0	0	0	0	0	0	0
938.5	0	0	0	0	0	0	0
939.5	0	0	0	0	0	0	0
940.5	0	0	0	0	0	0	0
941.5	0	0	0	0	0	0	0
942.5	0	0	0	0	0	0	0
943.5	0	0	0	0	0	0	0
944.5	0	0	0	0	0	0	0
945.5	0	0	0	0	0	0	0
946.5	0	0	0	0	0	0	0
947.5	0	0	0	0	0	0	0
948.5	0	0	0	0	0	0	0
949.5	0	0	0	0	0	0	0
950.5	0	0	0	0	0	0	0
951.5	0	0	0	0	0	0	0
952.5	0	0	0	0	0	0	0
953.5	0	0	0	0	0	0	0
954.5	0	0	0	0	0	0	0
955.5	0	0	0	0	0	0	0
956.5	0	0	0	0	0	0	0
957.5	0	0	0	0	0	0	0
958.5	0	0	0	0	0	0	0
959.5	0	0	0	0	0	0	0
960.5	0	0	0	0	0	0	0
961.5	0	0	0	0	0	0	0
962.5	0	0	0	0	0	0	0
963.5	0	0	0	0	0	0	0
964.5	0	0	0	0	0	0	0
965.5	0	0	0	0	0	0	0
966.5	0	0	0	0	0	0	0
967.5	0	0	0	0	0	0	0
968.5	0	0	0	0	0	0	0
969.5	0	0	0	0	0	0	0
970.5	0	0	0	0	0	0	0
971.5	0	0	0	0	0	0	0
972.5	0	0	0	0	0	0	0
973.5	0	0	0	0	0	0	0
974.5	0	0	0	0	0	0	0
975.5	0	0	0	0	0	0	0
976.5	0	0	0	0	0	0	0
977.5	0	0	0	0	0	0	0
978.5	0	0	0	0	0	0	0
979.5	0	0	0	0	0	0	0
980.5	0	0	0	0	0	0	0
981.5	0	0	0	0	0	0	0
982.5	0	0	0	0	0	0	0
983.5	0	0	0	0	0	0	0
984.5	0	0	0	0	0	0	0
985.5	0	0	0	0	0	0	0
986.5	0	0	0	0	0	0	0
987.5	0	0	0	0	0	0	0
988.5	0	0	0	0	0	0	0
989.5	0	0	0	0	0	0	0
990.5	0	0	0	0	0	0	0
991.5	0	0	0	0	0	0	0
992.5	0	0	0	0	0	0	0
993.5	0	0	0	0	0	0	0
994.5	0	0	0	0	0	0	0
995.5	0	0	0	0	0	0	0
996.5	0	0	0	0	0	0	0
997.5	0	0	0	0	0	0	0
998.5	0	0	0	0	0	0	0
999.5	0	0	0	0	0	0	0
Percentile	Size (nm)	Size (nm)	Size (nm)	Size (nm)	Size (nm)
0	29	42	25	26	13
1	63.2	66.8	63.6	68.2	68.1
2	66.9	69.8	67.2	72.5	73.6
3	69.1	72	69.6	75.4	77.1
4	70.8	74	71.4	77.6	79.9
5	72.3	76	73	79.5	82.2
6	73.6	77.8	74.4	81.1	84.1
7	74.7	79.7	75.8	82.6	85.9
8	75.8	81.5	77	84	87.4
9	76.9	83.3	78.2	85.3	88.9
10	77.9	85	79.4	86.5	90.2
11	78.9	86.7	80.5	87.6	91.5
12	79.8	88.2	81.6	88.7	92.7
13	80.7	89.6	82.7	89.8	93.9
14	81.6	91	83.7	90.8	95
15	82.5	92.2	84.8	91.8	96.1
16	83.4	93.4	85.8	92.7	97.1
17	84.2	94.5	86.9	93.7	98.1
18	85.1	95.6	87.9	94.6	99.1
19	86	96.7	88.8	95.5	100.1
20	86.8	97.7	89.8	96.4	101.1
21	87.7	98.6	90.8	97.3	102
22	88.6	99.6	91.7	98.2	103
23	89.5	100.5	92.7	99	103.9
24	90.4	101.4	93.6	99.9	104.8
25	91.3	102.3	94.5	100.8	105.8
26	92.2	103.2	95.4	101.6	106.7
27	93.2	104.1	96.3	102.5	107.7
28	94.1	104.9	97.2	103.3	108.6
29	95.1	105.8	98.1	104.2	109.6
30	96.2	106.7	99	105.1	110.5
31	97.2	107.5	99.9	105.9	111.5
32	98.3	108.4	100.7	106.8	112.4
33	99.4	109.3	101.6	107.7	113.4
34	100.5	110.2	102.6	108.7	114.4
35	101.6	111.1	103.5	109.6	115.4
36	102.8	112	104.4	110.5	116.4
37	104	112.9	105.4	111.5	117.4
38	105.1	113.8	106.3	112.5	118.4
39	106.3	114.8	107.3	113.6	119.5
40	107.4	115.8	108.3	114.6	120.5
41	108.6	116.8	109.4	115.7	121.6
42	109.7	117.8	110.5	116.9	122.6
43	110.8	118.9	111.6	118.1	123.7
44	111.9	120	112.8	119.3	124.8
45	113	121.2	114	120.6	125.9
46	114	122.3	115.2	121.9	127
47	115.1	123.6	116.5	123.3	128.1
48	116.1	124.8	117.8	124.8	129.2
49	117.2	126.1	119.1	126.3	130.4
50	118.2	127.5	120.4	127.9	131.5
51	119.2	128.8	121.8	129.5	132.6
52	120.2	130.2	123.2	131.2	133.8
53	121.3	131.7	124.5	132.9	135
54	122.3	133.2	125.9	134.7	136.1
55	123.3	134.7	127.2	136.5	137.3
56	124.4	136.3	128.5	138.3	138.5
57	125.4	137.8	129.8	140.2	139.7
58	126.5	139.5	131.1	142.1	140.9
59	127.6	141.1	132.4	144	142.2
60	128.7	142.8	133.6	146	143.4
61	129.9	144.4	134.9	147.9	144.7
62	131	146.2	136.1	149.9	146
63	132.3	147.9	137.3	151.8	147.3
64	133.5	149.7	138.5	153.8	148.6
65	134.8	151.5	139.7	155.9	150
66	136.2	153.3	140.9	157.9	151.4
67	137.6	155.2	142.2	159.9	152.9
68	139.1	157.1	143.4	162	154.4
69	140.7	159	144.7	164.1	155.9
70	142.3	160.9	146	166.3	157.6
71	144.1	162.9	147.4	168.4	159.3
72	145.9	164.8	148.8	170.6	161.1
73	147.8	166.8	150.3	172.8	163
74	149.8	168.8	151.9	175	165.1
75	151.8	170.7	153.6	177.3	167.3
76	154	172.6	155.5	179.5	169.7
77	156.2	174.5	157.5	181.8	172.3
78	158.5	176.4	159.7	184.1	175.1
79	160.9	178.3	162.1	186.4	178.3
80	163.2	180.2	164.7	188.7	181.8
81	165.6	182.1	167.7	191.1	185.7
82	168.1	184	170.9	193.5	190
83	170.5	186	174.3	195.9	194.8
84	173	187.9	177.9	198.4	199.9
85	175.5	190	181.6	200.9	205.4
86	178.1	192.1	185.4	203.6	211.1
87	180.7	194.3	189.5	206.4	216.8
88	183.4	196.7	193.7	209.4	222.4
89	186.3	199.3	198.3	212.7	228
90	189.3	202.2	203.6	216.3	233.4
91	192.5	205.6	209.9	220.5	238.9
92	196	209.8	217.7	225.4	244.4
93	200	215.7	227.4	231.6	250.2
94	204.6	226.5	238.5	240.2	256.6
95	210.3	276	250.2	253.2	264
96	217.9	295.4	262.1	274.2	273.7
97	229.5	304.6	274.7	303	289.2
98	251.2	312.4	289.7	336	327.4
99	298.8	321.6	316.7	376.2	385.1
100	448	675	611	853	771
Weighting	Surface Area
Filename	Capture 2019-07-24 13-36-52	Capture 2019-07-24 13-37-27	Capture 2019-07-24 13-38-02	Capture 2019-07-24 13-38-37	Capture 2019-07-24 13-39-12	Average	Standard Error
Mean	166.6	192.9	193.4	211.2	209.1	194.6	8
Mode	125.8	186.2	142.3	196.2	145	159.1	13.6
SD	64.7	83	94.7	103.9	96.1	88.5	6.8
D10	94.3	105.6	98.9	105.5	109.6	102.8	2.7
D50	156.3	176.7	166.2	188.7	184.1	174.4	5.9
D90	252.3	312.2	303.1	359.2	358.3	317	19.9
Valid Tracks	616	732	901	854	809
Graph Data
Bin centre (nm)	Surface area conc. (nm² / ml)	Surface area conc. (nm² / ml)	Surface area conc. (nm² / ml)	Surface area conc. (nm² / ml)	Surface area conc. (nm² / ml)	Surface area average	Standard Error
0.5	0	0	0	0	0	0	0
1.5	0	0	0	0	0	0	0
2.5	0	0	0	0	0	0	0
3.5	0	0	0	0	0	0	0
4.5	0	0	0	0	0	0	0
5.5	0	0	0	0	0	0	0
6.5	0	0	0	0	0	0	0
7.5	0	0	0	0	0	0	0
8.5	0	0	0	0	0	0	0
9.5	0	0	0	0	0	0	0
10.5	0	0	0	0	0	0	0
11.5	0	0	0	0	5	0	0
12.5	0	0	0	0	71	14	14
13.5	0	0	0	0	744	149	149
14.5	0	0	0	0	5870	1174	1174
15.5	0	0	0	0	35608	7122	7122
16.5	0	0	0	0	170266	34053	34053
17.5	0	0	0	0	656287	131258	131257
18.5	0	0	0	0	2081379	416276	416276
19.5	0	0	0	2	5534512	1106903	1106902
20.5	0	0	0	7	12554724	2510946	2510944
21.5	0	0	4	25	24687706	4937547	4937540
22.5	0	0	25	76	42710194	8542059	8542034
23.5	0	0	146	220	65908397	13181753	13181661
24.5	0	0	707	593	91896470	18379554	18379229
25.5	5	0	2946	1495	117181660	23437221	23436110
26.5	30	0	10663	3555	138225577	27647965	27644403
27.5	165	0	33933	8003	152476470	30503714	30493190
28.5	874	0	95955	17132	158930233	31808839	31780353
29.5	4419	0	243579	35013	158093415	31675285	31604565
30.5	20823	0	560402	68579	151518141	30433589	30271314
31.5	89919	0	1179199	129180	141198173	28519294	28170542
32.5	350721	0	2288943	234785	129062442	26387378	25672030
33.5	1222413	0	4132315	412990	116673859	24488315	23057691
34.5	3780721	0	6992683	705061	105128450	23321383	20489320
35.5	10338789	2	11174051	1171283	95092015	23555228	18029655
36.5	24983216	6	16981223	1897930	86903405	26153156	15887714
37.5	53453513	21	24708549	3006272	80691884	32372048	15408213
38.5	101687359	73	34643786	4664067	76480199	43495097	19940371
39.5	173035486	245	47089991	7100091	74264035	60297970	31261061
40.5	265386036	801	62404809	10622324	74069595	82496713	47903397
41.5	370153719	2535	81054698	15640421	75995792	108569433	67330162
42.5	474295774	7745	103681915	22693180	80248413	136185405	86582009
43.5	564591085	22742	131184253	32481667	87172782	163090506	102867388
44.5	631948171	64007	164810701	45908645	97290154	188004336	114316641
45.5	673680834	172239	206279549	64124898	111341833	211119871	120425943
46.5	693164291	442351	257928621	88583002	130343933	234092440	122033651
47.5	697753660	1083154	322909955	121099049	155654728	259700109	120996864
48.5	696377331	2528151	405443390	163922876	189055411	291465432	119829940
49.5	697844521	5627878	511144830	219817469	232843696	333455679	121420786
50.5	710220838	11963551	647444987	292148417	289937898	390343138	128708514
51.5	741129345	24330481	824112058	384984589	363986896	467708673	144216493
52.5	798670869	47446853	1053885615	503211471	459478902	572538742	169726374
53.5	892718895	88947329	1353216881	652658831	581839420	713876271	206453214
54.5	1036469339	160715669	1743090346	840244227	737506720	903605260	255526551
55.5	1248203455	280582953	2249871588	1074133329	933972082	1157352681	318386631
56.5	1553204372	474345182	2906085496	1363916709	1179772586	1495464869	397041330
57.5	1985644831	777907758	3750980331	1720800509	1484426870	1943952060	494353557
58.5	2590055792	1239124267	4830682440	2157805108	1858309146	2535195351	614518886
59.5	3421754175	1918576936	6197706098	2689961433	2312463813	3308092491	763770310
60.5	4545468843	2888229057	7909570293	3334489121	2858371328	4307225728	951120215
61.5	6031507494	4226743105	10026309967	4110934540	3507684546	5580635930	1188643727
62.5	7949267284	6010554552	12606772032	5041240440	4271961942	7175959250	1490639555
63.5	10358680673	8300740652	15703764793	6149713524	5162428429	9135065614	1871300539
64.5	13301070708	11127320588	19358372321	7462852887	6189794716	11487882244	2341290925
65.5	16791481400	14474447073	23594015985	9009002414	7364161727	14246621720	2904332163
66.5	20814500300	18271159557	28411081513	10817795620	8695027704	17401912939	3555021703
67.5	25324807381	22392038831	33783055852	12919373268	10191403516	20922135770	4278669303
68.5	30252419533	26669815930	39655066130	15343373256	11862027921	24756540554	5053254137
69.5	35511340006	30918321905	45945450991	18117718288	13715661226	28841698483	5852929126
70.5	41009535866	34960606162	52550546682	21267257731	15761424744	33109874237	6652014256
71.5	46658080777	38655244556	59352321032	24812352144	18009146009	37497428904	7428319906
72.5	52377832234	41914638844	66227964574	28767516938	20469666525	41951523823	8164995633
73.5	58102868893	44712013669	73060180559	33140259444	23155069751	46434078463	8850743926
74.5	63780764676	47077425293	79746797391	37930245544	26078791504	50922804882	9478840165
75.5	69370392430	49085899676	86208482215	43128914182	29255581999	55409854100	10045675583
76.5	74838250466	50841984158	92393712162	48719619799	32701297415	59898972800	10549432749
77.5	80154329418	52464584864	98280654704	54678327405	36432508594	64402080997	10989183921
78.5	85288380282	54074617268	103876097588	60974819838	40465924736	68935967943	11364411626
79.5	90207204106	55786472750	109211949168	67574311735	44817640831	73519515718	11674828981
80.5	94873327729	57703117064	114340044326	74439310547	49502229009	78171605735	11920414601
81.5	99245193252	59913975792	119326033913	81531530713	54531706182	82909687971	12101675361
82.5	103278782984	62494570542	124243041896	88813658438	59914422853	87748895343	12220214080
83.5	106930428902	65506984095	129165600908	96250782310	65653930314	92701545306	12279664488
84.5	110160419109	69000488064	134164181845	103811345633	71747894286	97776865787	12286967449
85.5	112936921769	73011945784	139300462524	111467532637	78187130993	102980798741	12253826185
86.5	115239710977	77565843015	144623361503	119195063979	84954844777	108315764850	12198016301
87.5	117063208301	82673975520	150165804948	126972438639	92026143201	113780314122	12144055624
88.5	118418449143	88334933419	155942191353	134779712738	99367894941	119368636319	12122601683
89.5	119333733223	94533574667	161946556081	142596946770	106938977431	125069957635	12167962565
90.5	119853899904	101240684374	168151495257	150402479600	114690936127	130867899052	12313489634
91.5	120038350476	108412984984	174507965293	158171200548	122569047278	136739909716	12585500262
92.5	119958089761	115993607181	180946110283	165872991319	130513744401	142656908589	12997449593
93.5	119692154352	123913066497	187377268322	173471498786	138462338587	148583265309	13546488465
94.5	119323823554	132090728635	193697259487	180923378934	146350938040	154477225730	14213661660
95.5	118936974926	140436697865	199790961158	188178122208	154116455823	160291842396	14967318083
96.5	118612864513	148854033418	205538039530	195178531585	161698588511	165976411511	15768112464
97.5	118427504326	157241189547	210819548731	201861877815	169041653028	171478354690	16573948137
98.5	118449699112	165494581976	215524958513	208161703267	176096183414	176745425256	17343917377
99.5	118739709471	173511199941	219559058427	214010190005	182820211561	181728073881	18041011954
100.5	119348440445	181191201096	222848138227	219340953882	189180183147	186381783359	18633765329
101.5	120317018139	188440439486	225344877514	224092080363	195151488823	190669180865	19097093132
102.5	121676609890	195172880878	227031494084	228209185693	200718618044	194561757718	19412571138
103.5	123448360274	201312854472	227920884320	231648274030	205874966263	198041067872	19568334517
104.5	125643348367	206797078197	228055711072	234378170493	210622343873	201099330400	19558738452
105.5	128262513673	211576381487	227505617547	236382342050	214970246408	203739420233	19383891923
106.5	131296542217	215617040254	226362933955	237659969798	218934950339	205974287313	19049155453
107.5	134725744995	218901638953	224737369356	238226201570	222538497889	207825890552	18564672530
108.5	138519993872	221429387200	222750230990	238111584973	225807629015	209323765210	17944980406
109.5	142638801809	223215843924	220528688744	237360749291	228772710354	210503358824	17208720528
110.5	147031642676	224292038282	218200517484	236030462157	231466700874	211404272295	16378444939
111.5	151638599755	224703018881	215889626959	234187227651	233924183545	212068531358	15480494079
112.5	156391411567	224505905495	213712551806	231904613315	236180482338	212538992904	14544900144
113.5	161214950776	223767554273	211775944325	229260494280	238270875071	212857963745	13605237576
114.5	166029130087	222561973471	210175005313	226334385833	240229905378	213066080016	12698280025
115.5	170751183270	220967638781	208992711581	223205005665	242090791501	213201466160	11863215186
116.5	175298225408	219064854668	208299654407	219948169087	243884925714	213299165857	11140035250
117.5	179589960116	216933292024	208154287786	216635080046	245641455789	213390815152	10566686421
118.5	183551377721	214649806233	208603393061	213331042431	247386938746	213504511638	10174900129
119.5	187115280529	212286607512	209682590331	210094583334	249145057041	213664823750	9985563277
120.5	190224480410	209909821603	211416760701	206976954611	250936387961	213892881057	10005599848
121.5	192833538620	207578447434	213820281912	204021962019	252778218176	214206489632	10228357591
122.5	194909954704	205343692109	216897019765	201266061944	254684396948	214620225094	10637678687
123.5	196434755578	203248644311	220640056914	198738663226	256665223220	215145468650	11213583274
124.5	197402482105	201328235322	225031178035	196462574317	258727363594	215790366675	11936937209
125.5	197820613426	199609432005	230040165444	194454542341	260873800002	216559710644	12791726532
126.5	197708504795	198111607019	235623991308	192725839112	263103807515	217454749950	13765079360
127.5	197095940000	196847036823	241726020639	191282858479	265412964186	218472964026	14845921966
128.5	196021413400	195821485923	248275361672	190127698600	267793196059	219607831131	16023177329
129.5	194530259482	195034844979	255186514658	189258711203	270232861340	220848638332	17284131047
130.5	192672741241	194481799421	262359473951	188671007216	272716878252	222180380016	18613284801
131.5	190502194663	194152513287	269680428698	188356914052	275226901178	223583790376	19991793090
132.5	188073307932	194033319420	277023182400	188306384474	277741549319	225035548709	21397445556
133.5	185440592980	194107411606	284251370148	188507360243	280236691224	226508685240	22805095619
134.5	182657086068	194355536715	291221495339	188946095896	282685787219	227973200247	24187420682
135.5	179773294721	194756685439	297786738493	189607449214	285060289938	229396891561	25515906850
136.5	176836391848	195288779260	303801414896	190475145308	287330100985	230746366459	26761965754
137.5	173889644783	195929349138	309125883101	191532021008	289464079260	231988195458	27898103980
138.5	170972057505	196656198650	313631641500	192760255552	291430593822	233090149406	28899074251
139.5	168118198203	197448041406	317206304447	194141592499	293198111481	234022449607	29742942958
140.5	165358181312	198285100071	319758130174	195657556547	294735806791	234758954979	30412013559
141.5	162717772520	199149652579	321219784732	197289667577	296014179917	235278211465	30893552251
142.5	160218586517	200026510526	321551070372	199019652840	297005666163	235564297284	31180272940
143.5	157878349870	200903415389	320740419606	200829656911	297685219908	235607412337	31270553200
144.5	155711204763	201771340181	318805050211	202702447834	298030855435	235404179685	31168371092
145.5	153728033163	202624687296	315789781211	204621616911	298024127736	234957649263	30882972722
146.5	151936784806	203461377293	311764613296	206571768781	297650537808	234277016397	30428300139
147.5	150342796097	204282827933	306821267819	208538697990	296899849219	233377087812	29822226578
148.5	148949090373	205093827423	301068946810	210509547980	295766305710	232277543659	29085659048
149.5	147756652950	205902310136	294629616378	212472948493	294248743156	231002054223	28241575799
150.5	146764676889	206719046754	287633125380	214419127704	292350593078	229577313961	27314067493
151.5	145970777469	207557263430	280212452143	216339995903	290079779009	228032053591	26327446236
152.5	145371175069	208432206157	272499329722	218229198309	287448510947	226396084040	25305476580
153.5	144960847405	209360666895	264620441750	220082135426	284472986802	224699415656	24270768312
154.5	144733653106	210360487337	256694314753	221895950324	281173012919	222971483688	23244353588
155.5	144682429297	211450054564	248828966453	223669483165	277571558210	221240498338	22245451862
156.5	144799066393	212647800589	241120309616	225403194275	273694258218	219532925818	21291406497
157.5	145074563645	213971715105	233651261796	227099057857	269568886265	217873096934	20397758094
158.5	145499069193	215438878001	226491475393	228760429241	265224809000	216282932165	19578403000
159.5	146061908474	217065015596	219697580225	230391889087	260692442914	214781767259	18845773364
160.5	146751604874	218864082333	213313821282	231999068411	256002727100	213386260800	18210970531
161.5	147555896452	220847867961	207372975387	233588458510	251186625635	212110364789	17683790422
162.5	148461752455	223025629234	201897439573	235167209942	246274670681	210965340377	17272601414
163.5	149455393166	225403744816	196900398372	236742924623	241296554927	209959803181	16984072866
164.5	150522316403	227985392391	192386994423	238323444873	236280779406	209099785499	16822800177
165.5	151647333683	230770248007	188355444899	239916642927	231254360185	208388805940	16790916076
166.5	152814618679	233754209124	184798063599	241530214038	226242595089	207827940106	16887798788
167.5	154007770212	236929144753	181702164249	243171475862	221268889521	207415888919	17109971761
168.5	155209891456	240282678186	179050833993	244847176394	216354638683	207149043742	17451238991
169.5	156403686498	243798009954	176823577064	246563312305	211519162065	207021549577	17903034885
170.5	157571574758	247453790695	174996837203	248324959173	206779685056	207025369377	18454915881
171.5	158695823074	251224055240	173544413740	250136114797	202151361801	207150353730	19095100790
172.5	159758694560	255078230368	172437790680	251999556562	197647333102	207384321054	19810978577
173.5	160742612610	258981229012	171646400738	253916713672	193278813032	207713153813	20589532644
174.5	161630337716	262893643208	171137847499	255887554982	189055198120	208120916305	21417663585
175.5	162405154073	266772046524	170878108712	257910493189	184984193290	208589999158	22282417322
176.5	163051062366	270569414104	170831742444	259982306155	181071949217	209101294857	23171139124
177.5	163552974614	274235664827	170962115454	262098076266	177323206338	209634407500	24071577990
178.5	163896906559	277718325447	171231669830	264251148821	173741441379	210167898407	24971963802
179.5	164070162872	280963311219	171602239758	266433110581	170329012887	210679567464	25861074608
180.5	164061510366	283915811654	172035425433	268633789711	167087302907	211146768014	26728305640
181.5	163861334526	286521263985	172493025699	270841278388	164016852498	211546751019	27563746327
182.5	163461774954	288726391175	172937525414	273041979385	161117489371	211857032060	28358267093
183.5	162856835797	290480276169	173332627941	275220677835	158388446398	212055772828	29103614234
184.5	162042467843	291735440021	173643818016	277360639229	155828470160	212122167054	29792508632
185.5	161016619721	292448888943	173838935920	279443734442	153435919077	212036819621	30418742348
186.5	159779256545	292583094407	173888740624	281450592196	151208850971	211782106949	30977266190
187.5	158332345223	292106871390	173767437848	283360778902	149145100126	211342506698	31464261106
188.5	156679806650	290996122736	173453148806	285153005242	147242344118	210704885511	31877186592
189.5	154827435971	289234422251	172928296980	286805358204	145498160829	209858734847	32214800311
190.5	152782792954	286813415322	172179893471	288295556526	143910076141	208796346883	32477144515
191.5	150555065376	283733023206	171199706085	289601226771	142475602890	207512924866	32665496756
192.5	148154909010	280001445132	169984303022	290700196429	141192271678	206006625054	32782284521
193.5	145594268326	275634960640	168534968358	291570799713	140057654155	204278530239	32830965723
194.5	142886182451	270657542468	166857493023	292192190979	139069379391	202332557662	32815879320
195.5	140044581122	265100297463	164961851110	292544660102	138225143902	200175306740	32742072443
196.5	137084075444	259000758973	162861776747	292609943625	137522715913	197815854140	32615112270
197.5	134019748122	252402058726	160574260944	292371525212	136959934346	195265505470	32440892136
198.5	130866947613	245352009105	158118990699	291814918732	136534703027	192537513835	32225442065
199.5	127641090238	237902128017	155517753978	290927927429	136244980544	189646776041	31974753793
200.5	124357473811	230106638203	152793834031	289700872868	136088766135	186609517010	31694629491
201.5	121031105777	222021471146	149971415097	288126787886	136064081992	183442972379	31390561711
202.5	117676548252	213703302772	147075018939	286201568459	136168952267	180165078138	31067649789
203.5	114307781712	205208644396	144128988350	283924080364	136401379124	176794174789	30730555167
204.5	110938088469	196593007993	141157029881	281296217517	136759316074	173348731987	30383495079
205.5	107579956456	187910160234	138181824071	278322910157	137240638893	169847097962	30030271148
206.5	104245003307	179211475128	135224707510	275012082264	137843114373	166307276516	29674326878
207.5	100943920224	170545390712	132305427531	271374558995	138564367183	162746732929	29318826038
208.5	97686434693	161956971298	129441967217	267423926172	139401845123	159182228901	28966742720
209.5	94481290786	153487573330	126650435966	263176345171	140352783074	155629685665	28620953407
210.5	91336245496	145174610145	123945018993	258650327637	141414165987	152104073652	28284321741
211.5	88258079392	137051408756	121337977982	253866475485	142582691277	148619326578	27959767689
212.5	85252619744	129147150223	118839694445	248847192397	143854731034	145188277569	27650314327
213.5	82324774233	121486884237	116458747270	243616373647	145226294519	141822614781	27359107370
214.5	79478573364	114091608037	114202016175	238199081380	146692991450	138532854081	27089404717
215.5	76717219763	106978399745	112074803444	232621212641	148249996639	135328326446	26844535540
216.5	74043142640	100160596481	110080967072	226909167278	149892016592	132217178013	26627830738
217.5	71458055820	93648008106	108223059432	221089522547	151613258737	129206380928	26442528811
218.5	68963017906	87447158157	106502466524	215188720697	153407403969	126301753451	26291663287
219.5	66558493302	81561544298	104919543856	209232775140	155267583260	123507987971	26177939532
220.5	64244412983	75991911430	103473745949	203246999980	157186359082	120828685885	26103610020
221.5	62020234083	70736531448	102163747268	197255766793	159155712421	118266398403	26070357637
222.5	59884997534	65791484416	100987553133	191282291578	161167036139	115822672560	26079196166
223.5	57837383142	61150936697	99942599819	185348453839	163211135428	113498101785	26130395836
224.5	55875761636	56807412264	99025843519	179474648831	165278236058	111292380462	26223439567
225.5	53998243351	52752054053	98233838326	173679673086	167358001045	109204361972	26357012798
226.5	52202723340	48974872817	97562803640	167980642554	169439556291	107232119729	26529026695
227.5	50486922773	45464981441	97008681696	162392941969	171511525636	105373010703	26736671761
228.5	48848426628	42210813162	96567186025	156930203447	173562075618	103623740976	26976496553
229.5	47284717674	39200322594	96233841789	151604311864	175578970099	101980432804	27244504826
230.5	45793206883	36421168804	96004018953	146425434188	177549634737	100438692713	27536263900
231.5	44371260385	33860880097	95872959280	141402069713	179461231077	98993680110	27847017381
232.5	43016223159	31507000457	95835798098	136541118019	181300739864	97640175920	28171796310
233.5	41725439663	29347217915	95887581751	131847961458	183055052935	96372650744	28505524146
234.5	40496271606	27369475342	96023281583	127326559032	184711072849	95185332082	28843112393
235.5	39326113106	25562064440	96237805210	122979548686	186255819210	94072270130	29179545070
236.5	38212403450	23913703864	96526005768	118808355208	187676540403	93027401739	29509951299
237.5	37152637682	22413602593	96882689752	114813301224	188960829311	92044612112	29829666189
238.5	36144375249	21051509770	97302623928	110993719001	190096741380	91117793865	30134280724
239.5	35185246895	19817752354	97780541780	107348061109	191072913295	90240903087	30419681727
240.5	34272960028	18703261963	98311149811	103874008269	191878680377	89408012089	30682083063
241.5	33405302721	17699592303	98889133982	100568573027	192504190785	88613358564	30918049266
242.5	32580146530	16798928614	99509166483	97428198160	192940514573	87851390872	31124512634
243.5	31795448299	15994090486	100165912962	94448849005	193179745637	87116809278	31298784714
244.5	31049251064	15278529382	100854040308	91626099148	193215094704	86404602921	31438562893
245.5	30339684227	14646322127	101568224980	88955209101	193040971597	85710082407	31541932667
246.5	29664963083	14092161539	102303161903	86431197824	192653055168	85028907903	31607366003
247.5	29023387823	13611345282	103053573844	84048907073	192048349502	84357112705	31633716072
248.5	28413342095	13199763950	103814221206	81803058737	191225225236	83691122245	31620208549
249.5	27833291217	12853889264	104579912144	79688305373	190183445090	83027768618	31566429624
250.5	27281780096	12570763189	105345512869	77699274305	188924173017	82364300695	31472310788
251.5	26757430933	12347988677	106105958049	75830605660	187449966683	81698390000	31338110496
252.5	26258940747	12183722651	106856261163	74076984786	185764753325	81028132535	31164392790
253.5	25785078787	12076671769	107591524711	72433169515	183873789325	80352046821	30952002991
254.5	25334683844	12026091397	108306950169	70894012753	181783604185	79669068470	30702040629
255.5	24906661524	12031788185	108997847600	69454480867	179501929866	78978541609	30415829811
256.5	24499981485	12094126502	109659644853	68109668347	177037616712	78280207580	30094887321
257.5	24113674673	12214038954	110287896283	66854809186	174400537458	77574191311	29740888781
258.5	23746830578	12393041092	110878290979	65685285418	171601480970	76860985808	29355633306
259.5	23398594514	12633250312	111426660468	64596633193	168652037564	76141435210	28941007167
260.5	23068164942	12937408857	111928985907	63584546793	165564477843	75416716868	28498947056
261.5	22754790851	13308910683	112381404799	62644880897	162351627063	74688322859	28031403649
262.5	22457769188	13751831787	112780217266	61773651417	159026737050	73958041342	27540306273
263.5	22176442358	14270963428	113121891934	60967035176	155603357677	73227938115	27027529598
264.5	21910195786	14871847421	113403071521	60221368670	152095209809	72500338641	26494863400
265.5	21658455552	15560812456	113620578180	59533146116	148516061557	71777810772	25943986584
266.5	21420686094	16345010059	113771418707	58899016981	144879609488	71063148266	25376446856
267.5	21196387982	17232448480	113852789687	58315783120	141199366304	70359355115	24793647582
268.5	20985095756	18232022407	113862082660	57780395681	137488556274	69669630556	24196843674
269.5	20786375840	19353535945	113796889406	57289951847	133760019519	68997354511	23587148587
270.5	20599824515	20607715871	113655007394	56841691516	130026125992	68346073058	22965554916
271.5	20425065958	22006211649	113434445476	56432993969	126298699802	67719483371	22332971512
272.5	20261750344	23561578229	113133429846	56061374572	122588954278	67121417454	21690280622
273.5	20109551998	25287237153	112750410315	55724481536	118907437976	66555823796	21038419277
274.5	19968167612	27197411098	112284066873	55420092747	115263991599	66026745986	20378489976
275.5	19837314504	29307026631	111733316548	55146112679	111667715640	65538297200	19711906736
276.5	19716728931	31631579765	111097320503	54900569363	108126948375	65094629387	19040583587
277.5	19606164442	34186958894	110375491308	54681611415	104649253690	64699895950	18367173393
278.5	19505390275	36989219921	109567500287	54487505092	101241418095	64358206734	17695364984
279.5	19414189787	40054308932	108673284843	54316631353	97909456202	64073574223	17030244793
280.5	19332358919	43397728650	107693055596	54167482901	94658623843	63849849982	16378723600
281.5	19259704692	47034146244	106627303198	54038661172	91493437978	63690650657	15750016054
282.5	19196043724	50976941802	105476804617	53928873249	88417702486	63599273176	15156135297
283.5	19141200776	55237699009	104242628731	53836928664	85434538969	63578599230	14612321069
284.5	19095007308	59825642306	102926140985	53761736075	82546421648	63630989665	14137254054
285.5	19057300060	64747027899	101529006925	53702299790	79755215525	63758170040	13752831938
286.5	19027919635	70004499514	100053194380	53657716113	77062216963	63961109321	13483233361
287.5	19006709099	75596423556	98500974070	53627169508	74468195933	64239894433	13353054836
288.5	18993512583	81516222114	96874918435	53609928570	71973439214	64593604183	13384561436
289.5	18988173890	87751726064	95177898501	53605341789	69577793903	65020186830	13594534074
290.5	18990535105	94284573834	93413078575	53612833110	67280710659	65516346257	13991598019
291.5	19000435201	101089684212	91583908651	53631897298	65081286190	66077442310	14574919252
292.5	19017708652	108134833449	89694114374	53662095104	62978304538	66697411223	15334623528
293.5	19042184033	115380367606	87747684495	53703048253	60970276823	67368712242	16253561514
294.5	19073682627	122779080404	85748855753	53754434262	59055479130	68082306435	17309622739
295.5	19112017028	130276284496	83702095181	53815981113	57231988333	68827673230	18477875331
296.5	19156989742	137810100017	81612079880	53887461786	55497715676	69592869420	19732160446
297.5	19208391793	145311978359	79483674343	53968688695	53850437992	70364634236	21046101934
298.5	19266001330	152707471598	77321905472	54059508030	52287826501	71128542586	22393667756
299.5	19329582249	159917248881	75131935457	54159794051	50807473159	71869206759	23749458083
300.5	19398882822	166858350819	72919032776	54269443333	49406914566	72570524863	25088863591
301.5	19473634350	173445661974	70688541564	54388369019	48083653484	73215972078	26388188249
302.5	19553549842	179593570326	68445849685	54516495076	46835178024	73788928591	27624788122
303.5	19638322728	185217771885	66196355857	54653750606	45658978602	74273035936	28777247712
304.5	19727625616	190237168986	63945436205	54800064218	44552562762	74652571558	29825596535
305.5	19821109108	194575802916	61698410646	54955358496	43513467989	74912829831	30751557912
306.5	19918400675	198164755936	59460509531	55119544580	42539272635	75040496671	31538816229
307.5	20019103617	200943955051	57236840955	55292516897	41627605096	75024004323	32173286552
308.5	20122796120	202863810231	55032359153	55474148039	40776151365	74853852982	32643369977
309.5	20229030412	203886623526	52851834407	55664283844	39982661100	74522886658	32940178984
310.5	20337332053	203987712418	50699824819	55862738664	39244952336	74026512058	33057718877
311.5	20447199362	203156200708	48580650331	56069290882	38560914973	73362851251	32993013851
312.5	20558103011	201395442699	46498369301	56283678659	37928513155	72532821365	32746169245
313.5	20669485786	198723060786	44456757906	56505595964	37345786668	71540137422	32320364865
314.5	20780762563	195170592121	42459292616	56734688896	36810851447	70391237528	31721777815
315.5	20891320481	190782755786	40509135882	56970552312	36321899323	69095132757	30959436860
316.5	21000519371	185616367249	38609125192	57212726802	35877197081	67663187139	30045013781
317.5	21107692424	179738940714	36761765523	57460696023	35475084928	66108835922	28992560421
318.5	21212147141	173227031793	34969225205	57713884407	35113974455	64447252600	27818202906
319.5	21313166576	166164382020	33233335147	57971655293	34792346158	62694977039	26539806825
320.5	21410010871	158639932701	31555591304	58233309481	34508746596	60869518190	25176628901
321.5	21501919130	150745778258	29937160233	58498084241	34261785239	58988945420	23748971694
322.5	21588111609	142575128594	28378887542	58765152817	34050131069	57071482326	22277858124
323.5	21667792260	134220346199	26881308982	59033624421	33872508975	55135116168	20784741796
324.5	21740151606	125771117179	25444663918	59302544768	33727695995	53197234693	19291266714
325.5	21804369986	117312806604	24068910871	59570897152	33614517445	51274300412	17819084953
326.5	21859621131	108925038097	22753744833	59837604105	33531842967	49381570226	16389731285
327.5	21905076089	100680526158	21498616015	60101529633	33478582536	47532866086	15024536195
328.5	21939907491	92644177902	20302749713	60361482057	33453682451	45740399923	13744528631
329.5	21963294115	84872469411	19165166956	60616217474	33456121337	44014653859	12570232856
330.5	21974425768	77413091191	18084705639	60864443829	33484906193	42364314524	11521203048
331.5	21972508423	70304847854	17060041826	61104825607	33539068494	40796258441	10615090907
332.5	21956769604	63577789318	16089710957	61335989149	33617660382	39315583882	9866075206
333.5	21926463971	57253544875	15172128701	61556528558	33719750960	37925683413	9282704922
334.5	21880879060	51345827331	14305611231	61765012200	33844422707	36628350506	8865660556
335.5	21819341143	45861072257	13488394713	61959989757	33990768032	35423913180	8606401412
336.5	21741221135	40799176826	12718653857	62139999809	34157885995	34311387524	8487643562
337.5	21645940512	36154303798	11994519379	62303577891	34344879184	33288644153	8485830294
338.5	21532977156	31915718476	11314094279	62449264992	34550850798	32352581140	8574716838
339.5	21401871081	28068629761	10675468839	62575616414	34774901920	31499297603	8728764297
340.5	21252229952	24595010425	10076734312	62681210947	35016129015	30724262931	8925452997
341.5	21083734345	21474376050	9515995265	62764660272	35273621648	30022477516	9146343610
342.5	20896142658	18684506658	8991380571	62824618510	35546460453	29388621770	9377186640
343.5	20689295618	16202099436	8501053075	62859791834	35833715344	28817191061	9607494377
344.5	20463120301	14003345151	8043217980	62868948057	36134443994	28302615096	9829900532
345.5	20217633596	12064424591	7616129973	62850926077	36447690583	27839360964	10039500605
346.5	19952945063	10361924606	7218099197	62804645101	36772484823	27422019758	10233263660
347.5	19669259103	8873176036	6847496107	62729113536	37107841264	27045377209	10409545225
348.5	19366876404	7576517907	6502755309	62623437439	37452758893	26704469190	10567700894
349.5	19046194604	6451493887	6182378462	62486828436	37806221020	26394623282	10707788031
350.5	18707708141	5478987987	5884936334	62318611004	38167195461	26111487785	10830339893
351.5	18352007251	4641307143	5609070090	62118229030	38534635001	25851049703	10936197210
352.5	17979776105	3922218483	5353491917	61885251548	38907478163	25609643243	11026384501
353.5	17591790065	3306948955	5116985052	61619377592	39284650241	25383950381	11102020716
354.5	17188912077	2782154651	4898403313	61320440083	39665064624	25170994950	11164255971
355.5	16772088198	2335866576	4696670196	60988408696	40047624381	24968131609	11214227926
356.5	16342342304	1957418946	4510777624	60623391662	40431224101	24773030927	11253032809
357.5	15900770002	1637365362	4339784400	60225636474	40814751982	24583661644	11281707206
358.5	15448531805	1367387421	4182814449	59795529470	41197092141	24398271057	11301217661
359.5	14986845638	1140199579	4039054878	59333594297	41577127138	24215364306	11312455818
360.5	14516978734	949453373	3907753930	58840489264	41953740688	24033683198	11316237379
361.5	14040239022	789643419	3788218862	58317003599	42325820545	23852185090	11313303621
362.5	13557966078	656017038	3679813789	57764052668	42692261533	23670022221	11304324499
363.5	13071521756	544488836	3581957538	57182672186	43051968697	23486521803	11289902666
364.5	12582280597	451561131	3494121527	56574011504	43403860560	23301167064	11270577923
365.5	12091620119	374250730	3415827714	55939326033	43746872437	23113579407	11246831776
366.5	11600911112	310022309	3346646612	55279968909	44079959811	22923501750	11219091882
367.5	11111508034	256728372	3286195417	54597381979	44402101711	22730783103	11187736263
368.5	10624739638	212555631	3234136241	53893086225	44712304092	22535364365	11153097225
369.5	10141899910	175977474	3190174465	53168671719	45009603165	22337265347	11115464967
370.5	9664239453	145712161	3154057237	52425787248	45293068671	22136572954	11075090882
371.5	9192957385	120686277	3125572096	51666129688	45561807059	21933430501	11032190588
372.5	8729193852	100002993	3104545747	50891433279	45814964544	21728028083	10986946723
373.5	8274023231	82914640	3090842975	50103458879	46051730029	21520593951	10939511543
374.5	7828448093	68799144	3084365705	49303983340	46271337853	21311386827	10890009371
375.5	7393393977	57139865	3085052209	48494789078	46473070357	21100689097	10838538926
376.5	6969705014	47508439	3092876441	47677653960	46656260241	20888800819	10785175562
377.5	6558140449	39550211	3107847521	46854341586	46820292694	20676034492	10729973458
378.5	6159372054	32971941	3130009339	46026592048	46964607288	20462710534	10672967748
379.5	5773982455	27531444	3159440280	45196113238	47088699611	20249153405	10614176626
380.5	5402464350	23028899	3196253062	44364572776	47192122637	20035688345	10553603423
381.5	5045220607	19299574	3240594680	43533590588	47274487827	19822638655	10491238654
382.5	4702565201	16207758	3292646433	42704732196	47335465940	19610323506	10427062027
383.5	4374724949	13641704	3352624029	41879502736	47374787567	19399056197	10361044426
384.5	4061841994	11509433	3420777753	41059341723	47392243379	19189142856	10293149836
385.5	3763976962	9735253	3497392671	40245618579	47387684091	18980881511	10223337216
386.5	3481112746	8256884	3582788867	39439628917	47361020142	18774561511	10151562315
387.5	3213158812	7023074	3677321670	38642591562	47312221111	18570463246	10077779410
388.5	2959955984	5991642	3781381869	37855646308	47241314853	18368858131	10001942975
389.5	2721281598	5127860	3895395873	37079852375	47148386393	18170008820	9924009265
390.5	2496854952	4403124	4019825793	36316187526	47033576565	17974169592	9843937834
391.5	2286342984	3793861	4155169422	35565547818	46897080432	17781586903	9761692968
392.5	2089366076	3280629	4301960056	34828747940	46739145473	17592500035	9677245055
393.5	1905503921	2847383	4460766155	34106522088	46560069596	17407141828	9590571893
394.5	1734301379	2480866	4632190760	33399525333	46360198942	17225739456	9501659955
395.5	1575274248	2170119	4816870669	32708335423	46139925548	17048515201	9410505618
396.5	1427914896	1906065	5015475291	32033454984	45899684853	16875687218	9317116371
397.5	1291697690	1681185	5228705154	31375314042	45639953084	16707470231	9221512036
398.5	1166084182	1489235	5457290006	30734272845	45361244530	16544076160	9123725997
399.5	1050527999	1325030	5701986474	30110624914	45064108742	16385714632	9023806486
400.5	944479416	1184253	5963575212	29504600279	44749127652	16232593363	8921817917
401.5	847389574	1063306	6242857511	28916368859	44416912657	16084918381	8817842314
402.5	758714325	959187	6540651300	28346043946	44068101667	15942894085	8711980833
403.5	677917705	869386	6857786522	27793685741	43703356143	15806723100	8604355405
404.5	604474999	791802	7195099805	27259304916	43323358147	15676605934	8495110504
405.5	537875431	724674	7553428431	26742866161	42928807411	15552740422	8384415050
406.5	477624462	666521	7933603538	26244291697	42520418444	15435320933	8272464447
407.5	423245712	616100	8336442561	25763464716	42098917694	15324537357	8159482738
408.5	374282522	572365	8762740869	25300232729	41665040780	15220573853	8045724866
409.5	330299176	534433	9213262628	24854410807	41219529796	15123607368	7931478992
410.5	290881794	501561	9688730869	24425784697	40763130712	15033805926	7817068820
411.5	255638936	473120	10189816807	24014113785	40296590867	14951326703	7702855846
412.5	224201921	448582	10717128449	23619133926	39820656580	14876313891	7589241437
413.5	196224908	427499	11271198529	23240560098	39336070869	14808896381	7476668595
414.5	171384749	409498	11852471882	22878088898	38843571292	14749185264	7365623243
415.5	149380653	394262	12461292321	22531400875	38343887920	14697271206	7256634835
416.5	129933675	381529	13097889144	22200162678	37837741434	14653221692	7150276054
417.5	112786073	371081	13762363422	21884029055	37325841363	14617078199	7047161321
418.5	97700536	362739	14454674199	21582644666	36808884448	14588853318	6947943837
419.5	84459325	356359	15174624802	21295645746	36287553146	14568527875	6853310843
420.5	72863337	351827	15921849452	21022661605	35762514271	14556048099	6763976811
421.5	62731121	349058	16695800382	20763315973	35234417767	14551322860	6680674316
422.5	53897851	347989	17495735690	20517228203	34703895612	14554221069	6604142418
423.5	46214287	348584	18320708178	20284014331	34171560851	14564569246	6535112492
424.5	39545732	350826	19169555404	20063288010	33638006764	14582149347	6474291642
425.5	33770990	354723	20040891212	19854661317	33103806143	14606696877	6422344004
426.5	28781349	360299	20933098986	19657745448	32569510697	14637899356	6379870520
427.5	24479593	367603	21844326866	19472151307	32035650569	14675395188	6347387967
428.5	20779044	376701	22772485162	19297490001	31502733960	14718772974	6325308255
429.5	17602648	387685	23715246189	19133373242	30971246855	14767571324	6313919152
430.5	14882106	400666	24670046696	18979413675	30441652849	14821279198	6313367611
431.5	12557052	415781	25634093077	18835225138	29914393064	14879336822	6323646823
432.5	10574285	433194	26604369475	18700422850	29389886154	14941137192	6344587880
433.5	8887049	453094	27577648877	18574623562	28868528386	15006028193	6375856639
434.5	7454365	475704	28550507249	18457445646	28350693795	15073315352	6416955976
435.5	6240419	501281	29519340702	18348509161	27836734415	15142265195	6467233217
436.5	5213992	530117	30480385648	18247435882	27326980560	15212109240	6525892207
437.5	4347946	562549	31429741826	18153849306	26821741177	15282048560	6592009154
438.5	3618753	598958	32363398046	18067374646	26321304230	15351258927	6664551284
439.5	3006066	639782	33277260440	17987638816	25825937153	15418896451	6742397248
440.5	2492337	685511	34167182941	17914270412	25335887323	15484103705	6824358321
441.5	2062472	736707	35028999685	17846899689	24851382580	15546016227	6909199540
442.5	1703516	794003	35858558959	17785158564	24372631772	15603769363	6995660109
443.5	1404384	858115	36651758301	17728680612	23899825334	15656505349	7082472583
444.5	1155610	929853	37404580313	17677101090	23433135873	15703380548	7168380526
445.5	949132	1010133	38113128706	17630056985	22972718790	15743572749	7252154456
446.5	778103	1099989	38773664106	17587187081	22518712899	15776288436	7332606038
447.5	636717	1200586	39382639126	17548132057	22071241063	15800769910	7408600537
448.5	520069	1313241	39936732190	17512534618	21630410839	15816302191	7479067612
449.5	424018	1439439	40432879646	17480039654	21196315124	15822219576	7543010534
450.5	345081	1580852	40868305679	17450294444	20769032796	15817911770	7599513956
451.5	280335	1739365	41240549601	17422948885	20348629364	15802829510	7647750312
452.5	227331	1917103	41547490097	17397655770	19935157607	15776489582	7686984957
453.5	184022	2116454	41787366090	17374071092	19528658204	15738479172	7716580115
454.5	148701	2340106	41958793900	17351854394	19129160363	15688459493	7735997712
455.5	119950	2591081	42060780460	17330669156	18736682435	15626168616	7744801139
456.5	96590	2872776	42092732408	17310183209	18351232514	15551423500	7742656014
457.5	77645	3189004	42054460935	17290069196	17972809035	15464121163	7729329969
458.5	62310	3544043	41946182330	17270005054	17601401340	15364239015	7704691511
459.5	49918	3942690	41768514265	17249674532	17236990249	15251834331	7668708012
460.5	39924	4390318	41522467889	17228767734	16879548597	15127042892	7621442856
461.5	31877	4892943	41209435891	17206981683	16529041767	14990076832	7563051810
462.5	25410	5457292	40831176746	17184020913	16185428201	14841221712	7493778671
463.5	20222	6090880	40389795420	17159598065	15848659890	14680832895	7413950245
464.5	16067	6802096	39887720843	17133434501	15518682856	14509331273	7323970733
465.5	12745	7600293	39327680523	17105260930	15195437601	14327198419	7224315593
466.5	10094	8495888	38712672689	17074818023	14878859556	14134971250	7115524963
467.5	7982	9500468	38045936399	17041857033	14568879493	13933236275	6998196704
468.5	6301	10626913	37330920041	17006140413	14265423935	13722623521	6872979174
469.5	4967	11889511	36571248687	16967442402	13968415537	13503800221	6740563790
470.5	3910	13304102	35770690741	16925549616	13677773453	13277464364	6601677475
471.5	3072	14888219	34933124344	16880261591	13393413689	13044338183	6457075060
472.5	2411	16661240	34062503939	16831391319	13115249430	12805161668	6307531716
473.5	1889	18644555	33162827418	16778765734	12843191362	12560686191	6153835494
474.5	1478	20861739	32238104233	16722226166	12577147963	12311668316	5996780032
475.5	1155	23338734	31292324805	16661628752	12317025792	12058863848	5837157472
476.5	901	26104045	30329431544	16596844798	12062729753	11803022208	5675751665
477.5	702	29188937	29353291753	16527761086	11814163348	11544881165	5513331685
478.5	546	32627651	28367672631	16454280134	11571228913	11285161975	5350645682
479.5	424	36457617	27376218561	16376320388	11333827842	11024564966	5188415131
480.5	329	40719679	26382430829	16293816363	11101860794	10763765599	5027329460
481.5	255	45458329	25389649843	16206718712	10875227894	10503411007	4868041110
482.5	197	50721936	24401039933	16114994235	10653828908	10244117042	4711161016
483.5	152	56562983	23419576724	16018625823	10437563422	9986465821	4557254540
484.5	118	63038305	22448037055	15917612330	10226330995	9731003760	4406837860
485.5	91	70209318	21488991402	15811968387	10020031313	9478240102	4260374839
486.5	70	78142252	20544798697	15701724144	9818564321	9228645897	4118274400
487.5	54	86908368	19617603440	15586924948	9621830352	8982653432	3980888425
488.5	41	96584170	18709334951	15467630961	9429730246	8740656074	3848510230
489.5	32	107251595	17821708624	15343916712	9242165456	8503008484	3721373652
490.5	24	118998190	16956229001	15215870598	9059038149	8270027192	3599652788
491.5	19	131917262	16114194481	15083594323	8880251295	8041991476	3483462446
492.5	14	146108001	15296703493	14947202289	8705708754	7819144510	3372859337
493.5	11	161675570	14504661928	14806820940	8535315346	7601694759	3267844052
494.5	8	178731155	13738791651	14662588058	8368976924	7389817559	3168363824
495.5	6	197391970	12999639898	14514652030	8206600436	7183656868	3074316065
496.5	5	217781218	12287589386	14363171069	8048093978	6983327131	2985552648
497.5	4	240027989	11602868966	14208312416	7893366842	6788915243	2901884841
498.5	3	264267103	10945564639	14050251512	7742329569	6600482565	2823088792
499.5	2	290638883	10315630810	13889171156	7594893976	6418066965	2748911439
500.5	2	319288853	9712901620	13725260648	7450973200	6241684864	2679076660
501.5	1	350367363	9137102244	13558714921	7310481720	6071333250	2613291515
502.5	0	384029125	8587860032	13389733680	7173335387	5906991645	2551252393
503.5	0	420432669	8064715405	13218520529	7039451442	5748624009	2492650896
504.5	0	459739691	7567132413	13045282122	6908748537	5596180553	2437179329
505.5	0	502114327	7094508890	12870227313	6781146744	5449599455	2384535661
506.5	0	547722303	6646186140	12693566326	6656567568	5308808467	2334427886
507.5	0	596730008	6221458115	12515509953	6534933956	5173726406	2286577730
508.5	0	649303446	5819580040	12336268770	6416170299	5044264511	2240723689
509.5	0	705607098	5439776471	12156052380	6300202436	4920327677	2196623402
510.5	0	765802680	5081248762	11975068695	6186957653	4801815558	2154055416
511.5	0	830047804	4743181939	11793523249	6076364682	4688623535	2112820382
512.5	0	898494544	4424750977	11611618546	5968353695	4580643552	2072741759
513.5	0	971287920	4125126496	11429553454	5862856298	4477764833	2033666092
514.5	0	1048564297	3843479876	11247522634	5759805524	4379874466	1995462954
515.5	0	1130449720	3578987828	11065716015	5659135825	4286857878	1958024608
516.5	0	1217058182	3330836418	10884318313	5560783058	4198599194	1921265459
517.5	0	1308489851	3098224598	10703508596	5464684472	4114981504	1885121351
518.5	0	1404829263	2880367246	10523459888	5370778703	4035887020	1849548762
519.5	0	1506143498	2676497759	10344338827	5279005749	3961197167	1814523918
520.5	0	1612480353	2485870230	10166305360	5189306963	3890792581	1780041861
521.5	0	1723866543	2307761228	9989512485	5101625033	3824553058	1746115474
522.5	0	1840305930	2141471231	9814106038	5015903967	3762357433	1712774469
523.5	0	1961777825	1986325721	9640224522	4932089076	3704083429	1680064334
524.5	0	2088235361	1841675995	9467998970	4850126956	3649607456	1648045212
525.5	0	2219603975	1706899700	9297552856	4769965468	3598804400	1616790687
526.5	0	2355780024	1581401134	9129002042	4691553724	3551547385	1586386453
527.5	0	2496629540	1464611338	8962454754	4614842062	3507707539	1556928820
528.5	0	2641987167	1355987999	8798011601	4539782033	3467153760	1528523024
529.5	0	2791655291	1255015197	8635765617	4466326378	3429752497	1501281296
530.5	0	2945403386	1161203004	8475802339	4394429009	3395367548	1475320664
531.5	0	3102967594	1074086975	8318199907	4324044991	3363859893	1450760466
532.5	0	3264050565	993227534	8163029196	4255130521	3335087563	1427719566
533.5	0	3428321563	918209281	8010353960	4187642909	3308905542	1406313288
534.5	0	3595416854	848640230	7860231005	4121540559	3285165730	1386650123
535.5	0	3764940398	784151004	7712710379	4056782948	3263716946	1368828272
536.5	0	3936464837	724393978	7567835574	3993330609	3244405000	1352932143
537.5	0	4109532793	669042407	7425643746	3931145110	3227072811	1339028935
538.5	0	4283658480	617789533	7286165941	3870189035	3211560598	1327165472
539.5	0	4458329621	570347680	7149427342	3810425967	3197706122	1317365451
540.5	0	4633009664	526447354	7015447506	3751820465	3185344998	1309627277
541.5	0	4807140303	485836349	6884240628	3694338051	3174311066	1303922616
542.5	0	4980144263	448278857	6755815792	3637945189	3164436820	1300195775
543.5	0	5151428362	413554603	6630177231	3582609265	3155553892	1298363951
544.5	0	5320386801	381458002	6507324594	3528298575	3147493594	1298318345
545.5	0	5486404684	351797326	6387253201	3474982300	3140087502	1299926066
546.5	0	5648861717	324393915	6269954306	3422630496	3133168087	1303032719
547.5	0	5807136071	299081403	6155415354	3371214070	3126569380	1307465508
548.5	0	5960608369	275704980	6043620234	3320704772	3120127671	1313036703
549.5	0	6108665757	254120683	5934549528	3271075168	3113682227	1319547279
550.5	0	6250706038	234194716	5828180754	3222298635	3107076028	1326790588
551.5	0	6386141800	215802808	5724488602	3174349335	3100156509	1334555909
552.5	0	6514404531	198829594	5623445167	3127202206	3092776300	1342631792
553.5	0	6634948655	183168035	5525020170	3080832946	3084793961	1350809105
554.5	0	6747255462	168718865	5429181171	3035217996	3076074699	1358883752
555.5	0	6850836880	155390067	5335893781	2990334524	3066491050	1366659033
556.5	0	6945239067	143096379	5245121855	2946160416	3055923544	1373947656
557.5	0	7030045767	131758836	5156827685	2902674256	3044261309	1380573412
558.5	0	7104881407	121304326	5070972178	2859855316	3031402645	1386372530
559.5	0	7169413898	111665182	4987515030	2817683539	3017255530	1391194753
560.5	0	7223357111	102778801	4906414886	2776139529	3001738065	1394904156
561.5	0	7266473002	94587276	4827629496	2735204535	2984778862	1397379740
562.5	0	7298573362	87037064	4751115860	2694860439	2966317345	1398515826
563.5	0	7319521177	80078670	4676830361	2655089744	2946303991	1398222275
564.5	0	7329231588	73666350	4604728894	2615875562	2924700479	1396424561
565.5	0	7327672427	67757838	4534766987	2577201596	2901479770	1393063705
566.5	0	7314864345	62314090	4466899908	2539052138	2876626096	1388096097
567.5	0	7290880515	57299043	4401082766	2501412046	2850134874	1381493207
568.5	0	7255845925	52679397	4337270614	2464266740	2822012535	1373241210
569.5	0	7209936271	48424405	4275418526	2427602188	2792276278	1363340527
570.5	0	7153376452	44505685	4215481684	2391404894	2760953743	1351805289
571.5	0	7086438705	40897038	4157415447	2355661886	2728082615	1338662736
572.5	0	7009440380	37574284	4101175419	2320360706	2693710158	1323952564
573.5	0	6922741400	34515111	4046717509	2285489400	2657892684	1307726206
574.5	0	6826741422	31698931	3993997983	2251036503	2620694968	1290046083
575.5	0	6721876735	29106750	3942973515	2216991035	2582189607	1270984807
576.5	0	6608616931	26721041	3893601226	2183342482	2542456336	1250624355
577.5	0	6487461379	24525641	3845838727	2150080793	2501581308	1229055214
578.5	0	6358935548	22505636	3799644145	2117196363	2459656338	1206375509
579.5	0	6223587201	20647272	3754976154	2084680027	2416778131	1182690112
580.5	0	6081982523	18937863	3711794002	2052523049	2373047487	1158109747
581.5	0	5934702189	17365709	3670057523	2020717110	2328568506	1132750084
582.5	0	5782337445	15920018	3629727163	1989254299	2283447785	1106730834
583.5	0	5625486206	14590840	3590763983	1958127102	2237793626	1080174849
584.5	0	5464749226	13368997	3553129675	1927328393	2191715258	1053207225
585.5	0	5300726371	12246027	3516786565	1896851423	2145322077	1025954410
586.5	0	5134013012	11214125	3481697617	1866689811	2098722913	998543319
587.5	0	4965196589	10266096	3447826436	1836837532	2052025331	971100459
588.5	0	4794853348	9395304	3415137265	1807288910	2005334965	943751054
589.5	0	4623545292	8595631	3383594981	1778038606	1958754902	916618170
590.5	0	4451817357	7861436	3353165091	1749081608	1912385098	889821846
591.5	0	4280194827	7187518	3323813725	1720413223	1866321859	863478209
592.5	0	4109181011	6569080	3295507627	1692029064	1820657356	837698590
593.5	0	3939255179	6001703	3268214145	1663925044	1775479214	812588624
594.5	0	3770870775	5481309	3241901219	1636097364	1730870133	788247342
595.5	0	3604453904	5004142	3216537371	1608542504	1686907584	764766260
596.5	0	3440402093	4566738	3192091690	1581257213	1643663547	742228464
597.5	0	3279083327	4165905	3168533817	1554238498	1601204309	720707724
598.5	0	3120835353	3798698	3145833933	1527483618	1559590320	700267636
599.5	0	2965965240	3462407	3123962741	1500990071	1518876092	680960839
600.5	0	2814749195	3154531	3102891454	1474755584	1479110153	662828340
601.5	0	2667432611	2872767	3082591773	1448778109	1440335052	645898975
602.5	0	2524230343	2614994	3063035876	1423055805	1402587404	630189065
603.5	0	2385327188	2379255	3044196401	1397587037	1365897976	615702294
604.5	0	2250878559	2163749	3026046426	1372370359	1330291819	602429860
605.5	0	2121011334	1966818	3008559456	1347404513	1295788424	590350899
606.5	0	1995824858	1786933	2991709405	1322688410	1262401921	579433206
607.5	0	1875392083	1622688	2975470581	1298221129	1230141296	569634239
608.5	0	1759760830	1472786	2959817670	1274001904	1199010638	560902366
609.5	0	1648955143	1336037	2944725719	1250030116	1169009403	553178307
610.5	0	1542976728	1211342	2930170123	1226305282	1140132695	546396716
611.5	0	1441806458	1097691	2916126610	1202827048	1112371562	540487832
612.5	0	1345405918	994156	2902571225	1179595182	1085713296	535379107
613.5	0	1253718979	899883	2889480319	1156609560	1060141748	530996782
614.5	0	1166673388	814086	2876830536	1133870162	1035637635	527267313
615.5	0	1084182357	736042	2864598800	1111377062	1012178852	524118643
616.5	0	1006146131	665089	2852762303	1089130418	989740788	521481263
617.5	0	932453536	600617	2841298496	1067130467	968296623	519289071
618.5	0	862983483	542065	2830185081	1045377512	947817628	517480011
619.5	0	797606428	488920	2819399996	1023871921	928273453	515996525
620.5	0	736185770	440710	2808921414	1002614111	909632401	514785816
621.5	0	678579190	397002	2798727733	981604547	891861695	513799955
622.5	0	624639919	357399	2788797569	960843730	874927724	512995863
623.5	0	574217927	321538	2779109754	940332192	858796282	512335179
624.5	0	527161038	289083	2769643329	920070487	843432788	511784055
625.5	0	483315966	259731	2760377542	900059188	828802485	511312884
626.5	0	442529259	233202	2751291849	880298872	814870636	510895996
627.5	0	404648170	209239	2742365908	860790123	801602688	510511324
628.5	0	369521440	187608	2733579585	841533517	788964430	510140068
629.5	0	337000001	168096	2724912952	822529623	776922134	509766348
630.5	0	306937596	150506	2716346288	803778990	765442676	509376878
631.5	0	279191326	134661	2707860088	785282147	754493644	508960648
632.5	0	253622120	120396	2699435061	767039594	744043434	508508624
633.5	0	230095130	107564	2691052143	749051797	734061327	508013477
634.5	0	208480065	96029	2682692498	731319183	724517555	507469324
635.5	0	188651458	85667	2674337526	713842136	715383357	506871504
636.5	0	170488871	76366	2665968877	696620991	706631021	506216373
637.5	0	153877049	68023	2657568456	679656029	698233911	505501117
638.5	0	138706022	60545	2649118434	662947476	690166495	504723600
639.5	0	124871159	53848	2640601262	646495493	682404352	503882216
640.5	0	112273181	47854	2631999682	630300179	674924179	502975778
641.5	0	100818136	42494	2623296742	614361562	667703787	502003411
642.5	0	90417345	37704	2614475805	598679600	660722091	500964464
643.5	0	80987310	33428	2605520571	583254174	653959097	499858446
644.5	0	72449605	29613	2596415087	568085088	647395879	498684961
645.5	0	64730742	26212	2587143765	553172065	641014557	497443663
646.5	0	57762014	23183	2577691400	538514746	634798269	496134222
647.5	0	51479336	20487	2568043182	524112686	628731138	494756293
648.5	0	45823059	18090	2558184720	509965354	622798245	493309498
649.5	0	40737786	15960	2548102055	496072132	616985587	491793409
650.5	0	36172176	14069	2537781678	482432311	611280047	490207544
651.5	0	32078744	12392	2527210550	469045091	605669356	488551362
652.5	0	28413666	10905	2516376120	455909582	600142055	486824262
653.5	0	25136570	9589	2505266342	443024802	594687460	485025586
654.5	0	22210341	8424	2493869690	430389674	589295626	483154630
655.5	0	19600924	7395	2482175183	418003032	583957307	481210645
656.5	0	17277131	6486	2470172395	405863615	578663925	479192850
657.5	0	15210451	5683	2457851475	393970070	573407536	477100442
658.5	0	13374870	4976	2445203166	382320954	568180793	474932609
659.5	0	11746695	4353	2432218815	370914732	562976919	472688535
660.5	0	10304385	3804	2418890393	359749778	557789672	470367422
661.5	0	9028390	3322	2405210509	348824377	552613320	467968490
662.5	0	7900999	2898	2391172422	338136727	547442609	465490997
663.5	0	6906195	2526	2376770055	327684941	542272743	462934249
664.5	0	6029514	2200	2361998005	317467043	537099352	460297604
665.5	0	5257921	1914	2346851558	307480978	531918474	457580491
666.5	0	4579686	1664	2331326693	297724609	526726530	454782414
667.5	0	3984270	1446	2315420095	288195718	521520306	451902961
668.5	0	3462222	1254	2299129162	278892013	516296930	448941814
669.5	0	3005077	1088	2282452007	269811127	511053860	445898755
670.5	0	2605269	942	2265387465	260950618	505788859	442773674
671.5	0	2256042	815	2247935100	252307979	500499987	439566572
672.5	0	1951377	705	2230095198	243880634	495185583	436277570
673.5	0	1685916	609	2211868776	235665942	489844249	432906908
674.5	0	1454900	526	2193257574	227661204	484474841	429454955
675.5	0	1254106	453	2174264058	219863660	479076456	425922208
676.5	0	1079794	390	2154891410	212270497	473648418	422309294
677.5	0	928655	336	2135143525	204878848	468190273	418616974
678.5	0	797768	289	2115025005	197685798	462701772	414846142
679.5	0	684556	248	2094541145	190688388	457182867	410997826
680.5	0	586750	213	2073697928	183883613	451633701	407073189
681.5	0	502354	183	2052502009	177268432	446054596	403073525
682.5	0	429617	157	2030960701	170839766	440446048	399000261
683.5	0	367003	134	2009081963	164594504	434808721	394854954
684.5	0	313166	115	1986874380	158529506	429143433	390639288
685.5	0	266931	98	1964347147	152641604	423451156	386355072
686.5	0	227271	84	1941510048	146927611	417733003	382004236
687.5	0	193291	71	1918373436	141384315	411990223	377588830
688.5	0	164211	61	1894948211	136008492	406224195	373111014
689.5	0	139354	52	1871245795	130796903	400436421	368573062
690.5	0	118130	44	1847278112	125746299	394628517	363977351
691.5	0	100030	37	1823057555	120853425	388802210	359326357
692.5	0	84612	32	1798596968	116115021	382959326	354622654
693.5	0	71493	27	1773909610	111527826	377101791	349868901
694.5	0	60343	23	1749009136	107088583	371231617	345067845
695.5	0	50877	19	1723909558	102794038	365350898	340222309
696.5	0	42850	16	1698625223	98640947	359461807	335335185
697.5	0	36051	14	1673170780	94626074	353566584	330409436
698.5	0	30299	12	1647561150	90746198	347667532	325448080
699.5	0	25437	10	1621811490	86998114	341767010	320454188
700.5	0	21333	8	1595937171	83378635	335867430	315430880
701.5	0	17873	7	1569953737	79884596	329971242	310381312
702.5	0	14958	6	1543876878	76512853	324080939	305308676
703.5	0	12505	5	1517722400	73260289	318199040	300216189
704.5	0	10443	4	1491506186	70123814	312328090	295107089
705.5	0	8713	3	1465244173	67100370	306470652	289984624
706.5	0	7261	3	1438952315	64186926	300629301	284852053
707.5	0	6046	2	1412646555	61380490	294806619	279712633
708.5	0	5028	2	1386342791	58678102	289005185	274569615
709.5	0	4177	2	1360056851	56076839	283227574	269426238
710.5	0	3467	1	1333804459	53573818	277476349	264285723
711.5	0	2875	1	1307601210	51166196	271754056	259151265
712.5	0	2381	0	1281462537	48851170	266063218	254026031
713.5	0	1970	0	1255403691	46625981	260406328	248913150
714.5	0	1629	0	1229439706	44487913	254785850	243815711
715.5	0	1345	0	1203585381	42434297	249204205	238736755
716.5	0	1110	0	1177855252	40462508	243663774	233679271
717.5	0	914	0	1152263569	38569968	238166890	228646194
718.5	0	753	0	1126824275	36754148	232715835	223640394
719.5	0	619	0	1101550982	35012566	227312834	218664678
720.5	0	509	0	1076456955	33342790	221960051	213721781
721.5	0	418	0	1051555088	31742436	216659588	208814367
722.5	0	342	0	1026857893	30209173	211413482	203945020
723.5	0	281	0	1002377478	28740718	206223695	199116244
724.5	0	230	0	978125535	27334839	201092121	194330460
725.5	0	188	0	954113324	25989354	196020573	189589999
726.5	0	153	0	930351664	24702134	191010790	184897107
727.5	0	125	0	906850919	23471100	186064429	180253935
728.5	0	102	0	883620989	22294224	181183063	175662542
729.5	0	83	0	860671300	21169528	176368182	171124890
730.5	0	68	0	838010801	20095087	171621191	166642844
731.5	0	55	0	815647954	19069024	166943407	162218172
732.5	0	45	0	793590730	18089513	162336057	157852542
733.5	0	36	0	771846605	17154780	157800284	153547520
734.5	0	29	0	750422562	16263097	153337138	149304575
735.5	0	24	0	729325085	15412787	148947579	145125071
736.5	0	19	0	708560160	14602223	144632480	141010275
737.5	0	16	0	688133277	13829823	140392623	136961350
738.5	0	13	0	668049435	13094055	136228701	132979361
739.5	0	10	0	648313140	12393433	132141317	129065272
740.5	0	8	0	628928413	11726516	128130987	125219948
741.5	0	7	0	609898794	11091910	124198142	121444159
742.5	0	5	0	591227350	10488266	120343124	117738576
743.5	0	4	0	572916679	9914278	116566192	114103775
744.5	0	3	0	554968921	9368684	112867522	110540239
745.5	0	3	0	537385766	8850265	109247207	107048360
746.5	0	2	0	520168461	8357842	105705261	103628440
747.5	0	2	0	503317825	7890278	102241621	100280692
748.5	0	1	0	486834254	7446476	98856146	97005245
749.5	0	1	0	470717737	7025377	95548623	93802145
750.5	0	0	0	454967867	6625964	92318766	90671354
751.5	0	0	0	439583851	6247252	89166221	87612760
752.5	0	0	0	424564526	5888296	86090564	84626173
753.5	0	0	0	409908370	5548185	83091311	81711328
754.5	0	0	0	395613515	5226045	80167912	78867894
755.5	0	0	0	381677765	4921033	77319760	76095469
756.5	0	0	0	368098605	4632339	74546189	73393586
757.5	0	0	0	354873217	4359188	71846481	70761719
758.5	0	0	0	341998495	4100834	69219866	68199281
759.5	0	0	0	329471062	3856560	66665524	65705629
760.5	0	0	0	317287278	3625679	64182591	63280067
761.5	0	0	0	305443259	3407535	61770159	60921849
762.5	0	0	0	293934894	3201496	59427278	58630182
763.5	0	0	0	282757852	3006959	57152962	56404228
764.5	0	0	0	271907603	2823345	54946190	54243109
765.5	0	0	0	261379432	2650101	52805907	52145907
766.5	0	0	0	251168446	2486699	50731029	50111668
767.5	0	0	0	241269599	2332633	48720446	48139407
768.5	0	0	0	231677694	2187420	46773023	46228109
769.5	0	0	0	222387408	2050598	44887601	44376728
770.5	0	0	0	213393294	1921727	43063004	42584199
771.5	0	0	0	204689803	1800387	41298038	40849429
772.5	0	0	0	196271292	1686177	39591494	39171311
773.5	0	0	0	188132037	1578715	37942150	37548716
774.5	0	0	0	180266244	1477637	36348776	35980505
775.5	0	0	0	172668064	1382596	34810132	34465523
776.5	0	0	0	165331599	1293262	33324972	33002607
777.5	0	0	0	158250919	1209322	31892048	31590586
778.5	0	0	0	151420066	1130476	30510108	30228282
779.5	0	0	0	144833068	1056441	29177902	28914515
780.5	0	0	0	138483949	986946	27894179	27648103
781.5	0	0	0	132366735	921735	26657694	26427863
782.5	0	0	0	126475466	860565	25467206	25252615
783.5	0	0	0	120804201	803205	24321481	24121182
784.5	0	0	0	115347031	749436	23219293	23032392
785.5	0	0	0	110098079	699049	22159426	21985080
786.5	0	0	0	105051515	651848	21140673	20978090
787.5	0	0	0	100201558	607647	20161841	20010275
788.5	0	0	0	95542483	566268	19221750	19080498
789.5	0	0	0	91068626	527544	18319234	18187635
790.5	0	0	0	86774394	491317	17453142	17330574
791.5	0	0	0	82654264	457437	16622340	16508219
792.5	0	0	0	78702789	425763	15825710	15719486
793.5	0	0	0	74914609	396160	15062154	14963310
794.5	0	0	0	71284443	368503	14330589	14238642
795.5	0	0	0	67807103	342673	13629955	13544450
796.5	0	0	0	64477494	318556	12959210	12879719
797.5	0	0	0	61290613	296046	12317332	12243454
798.5	0	0	0	58241557	275043	11703320	11634681
799.5	0	0	0	55325522	255452	11116195	11052442
800.5	0	0	0	52537807	237185	10554998	10495803
801.5	0	0	0	49873813	220158	10018794	9963846
802.5	0	0	0	47329047	204291	9506668	9455678
803.5	0	0	0	44899123	189511	9017727	8970424
804.5	0	0	0	42579758	175747	8551101	8507232
805.5	0	0	0	40366780	162934	8105943	8065271
806.5	0	0	0	38256123	151010	7681427	7643730
807.5	0	0	0	36243830	139917	7276749	7241821
808.5	0	0	0	34326050	129600	6891130	6858776
809.5	0	0	0	32499042	120007	6523810	6493850
810.5	0	0	0	30759168	111092	6174052	6146317
811.5	0	0	0	29102902	102808	5841142	5815474
812.5	0	0	0	27526818	95114	5524386	5500639
813.5	0	0	0	26027597	87970	5223113	5201149
[truncated: 4,742 more rows]
